# Supplementary material
Source: PubMed Central journal article supplement (PMC7357821)
Supplement: NIHMS1558603-supplement-1.pdf [file NIHMS1558603-supplement-1.pdf]

## **Phage-assisted evolution of an adenine base editor with enhanced Cas domain compatibility and activity**

Michelle F. Richter<sup>1,2,3,\*</sup>, Kevin T. Zhao<sup>1,2,3,\*</sup>, Elliot Eton<sup>1,2,3</sup>, Audrone Lapinaite<sup>4</sup>, Gregory A. Newby<sup>1,2,3</sup>, Benjamin W. Thuronyi<sup>1,2,3</sup>, Christopher Wilson<sup>1,2,3</sup>, Luke W. Koblan<sup>1,2,3</sup>, Jing Zeng<sup>5,6,7</sup>, Daniel E. Bauer<sup>5,6,7</sup>, Jennifer A. Doudna<sup>4,8,9,10,11</sup>, David R. Liu<sup>1,2,3</sup>

### **SUPPLEMENTARY INFORMATION**

**Supplementary Figure 1.** Base editing efficiencies and indel frequencies for SpABE7.10 and SpABE8a-e-dimer variants at four genomic sites in HEK293T cells.

**Supplementary Figure 2.** Base editing efficiencies and indel frequencies for SaABE7.10 and SaABE8a-e-dimer variants at four genomic sites in HEK293T cells.

**Supplementary Figure 3.** Base editing efficiencies and indel frequencies for LbABE7.10 and LbABE8a-e-dimer variants at three genomic sites in HEK293T cells.

**Supplementary Figure 4.** Base editing efficiencies and indel frequencies for SpABE7.10, SpABE8e, CP1028-ABE7.10, CP1028-ABE8e, CP1028-ABE8e-dimer, CP1041-ABE7.10, CP1041-ABE8e, and CP1041-ABE8e-dimer at seven genomic sites in HEK293T cells.

**Supplementary Figure 5.** Base editing efficiencies and indel frequencies for SaABE7.10, SaABE8e, SaABE8e-dimer, SaKKH-ABE7.10, SaKKH-ABE8e, and SaKKH-ABE8e-dimer in HEK293T cells at five genomic sites with NNGRRT PAMs in HEK293T cells.

**Supplementary Figure 6.** Base editing efficiencies and indel frequencies for LbABE7.10, LbABE8e, Lb-ABE8e-dimer, enAsABE7.10, enAsABE8e, and enAsABE8e-dimer in HEK293T cells at three genomic sites in HEK293T cells.

**Supplementary Figure 7.** Base editing efficiencies and indel frequencies for NG-ABE7.10, NG-ABE8e, and NG-ABE8e-dimer in HEK293T cells at five genomic sites in HEK293T cells.

**Supplementary Figure 8.** Base editing efficiencies and indel frequencies for SaABE7.10, SaABE8e, SaABE8e-dimer, SaKKH-ABE7.10, SaKKH-ABE8e, and SaKKH-ABE8e-dimer in HEK293T cells at nine genomic sites with NNHRRT PAMs in HEK293T cells.

**Supplementary Figure 9.** Processivity analysis for ABE7.10 and ABE8e.

**Supplementary Figure 10.** Comparison of ABE8e and Cas9 nuclease at the top three off-target sites for *EMX1* as identified by GUIDE-Seq.

**Supplementary Figure 11.** On-target DNA base editing efficiencies comparing ABE8e mutants with minimized transcriptome-wide RNA off-target editing.

**Supplementary Figure 12.** On-target base editing efficiencies and indel frequencies for ABE7.10, ABE8e, and ABE8e (TadA-8e V106W) in HEK293T cells at seven genomic sites in HEK293T cells.

**Supplementary Figure 13.** On-target base editing efficiencies and indel frequencies for SaABE7.10, SaABE8e, and SaABE8e (TadA-8e V106W) in HEK293T cells at four genomic sites in HEK293T cells.

**Supplementary Figure 14.** On-target base editing efficiencies and indel frequencies for LbABE7.10, LbABE8e, and LbABE8e (TadA-8e V106W) in HEK293T cells at six genomic sites in HEK293T cells.

**Supplementary Figure 15.** On-target base editing efficiencies and indel frequencies for ABE7.10, ABE8e, and ABE8e (TadA-8e V106W) in HEK293T cells at site 3 in HEK293T for the orthogonal R-loop assay.

**Supplementary Figure 16.** Allele compositions following treatment with ABE7.10 or ABE8e at a GATA1 binding site of a *BCL11A* enhancer.

**Supplementary Figure 17.** Allele compositions following treatment with ABE7.10 or ABE8e at the *HBG1* and *HBG2* promoter.

**Supplementary Table 1.** Gene circuit components.

**Supplementary Table 2.** Selection schedule for PANCE.

**Supplementary Table 3.** Protospacer sequences for mammalian genomic sites.

**Supplementary Table 4.** Primers used for mammalian cell genomic DNA amplification.

**Supplementary Table 5.** Amplicons for high-throughput sequencing analysis.

**Supplementary Note 1.** Python script to extract allele frequencies with two edits.

**Supplementary Sequences 1.** Amino acid sequences for each base editor in this study.

**a**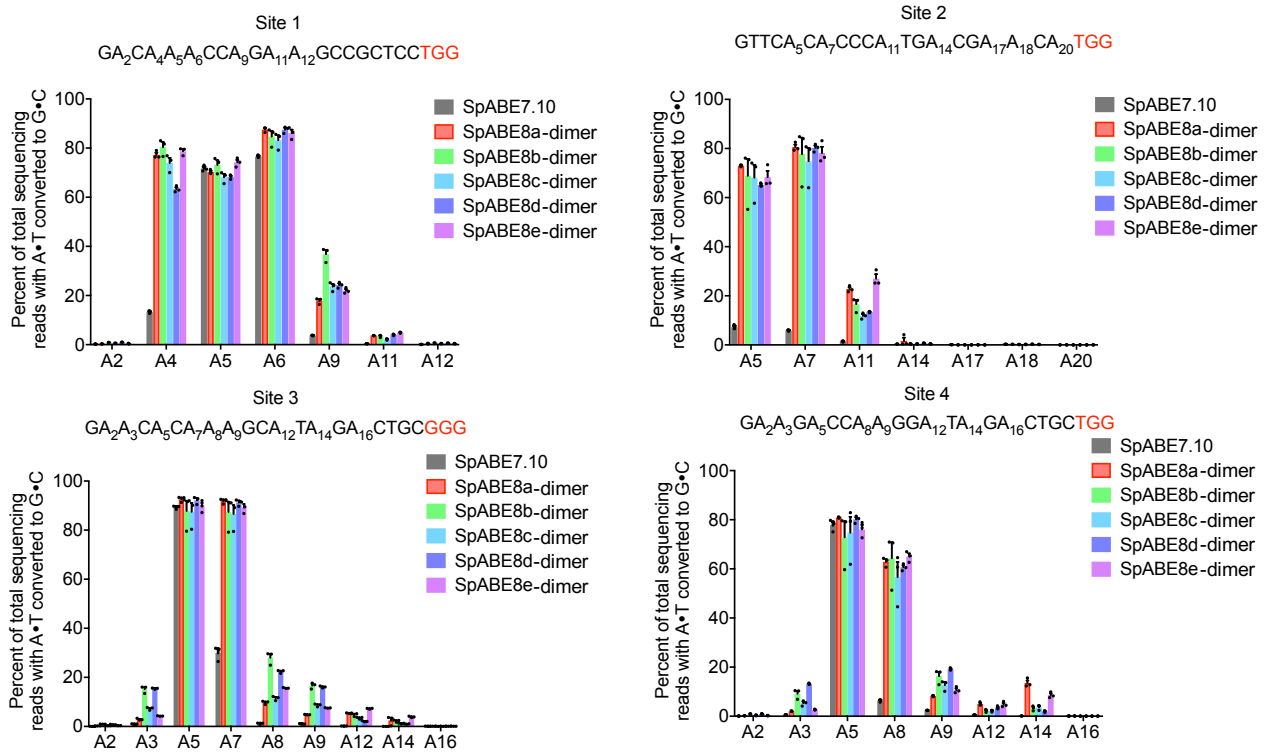**b**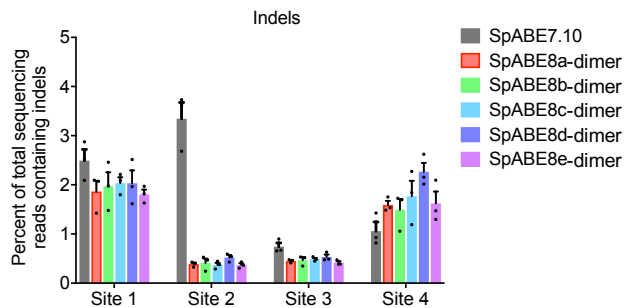

**Supplementary Figure 1. Base editing efficiencies and indel frequencies for SpABE7.10 and SpABE8a-e-dimer variants at four genomic sites in HEK293T cells.** **a**, Base editing with SpABE7.10, SpABE8a-dimer, SpABE8b-dimer, SpABE8c-dimer, SpABE8d-dimer, and SpABE8e-dimer at four genomic sites in HEK293T cells. **b**, Percent of all sequencing reads containing an indel following modification by SpABE7.10-dimer, SpABE8a-dimer, SpABE8b-dimer, SpABE8c-dimer, SpABE8d-dimer, or SpABE8e-dimer at four genomic sites in HEK293T cells. All base editors are optimized with the architecture, codon usage, and nuclear localization signals of ABE<sub>max</sub><sup>16</sup>. All untreated controls show no editing or indel formation at all sites. For all plots, dots represent individual biological replicates and bars represent mean $\pm$ s.d. of three independent biological replicates.

**a**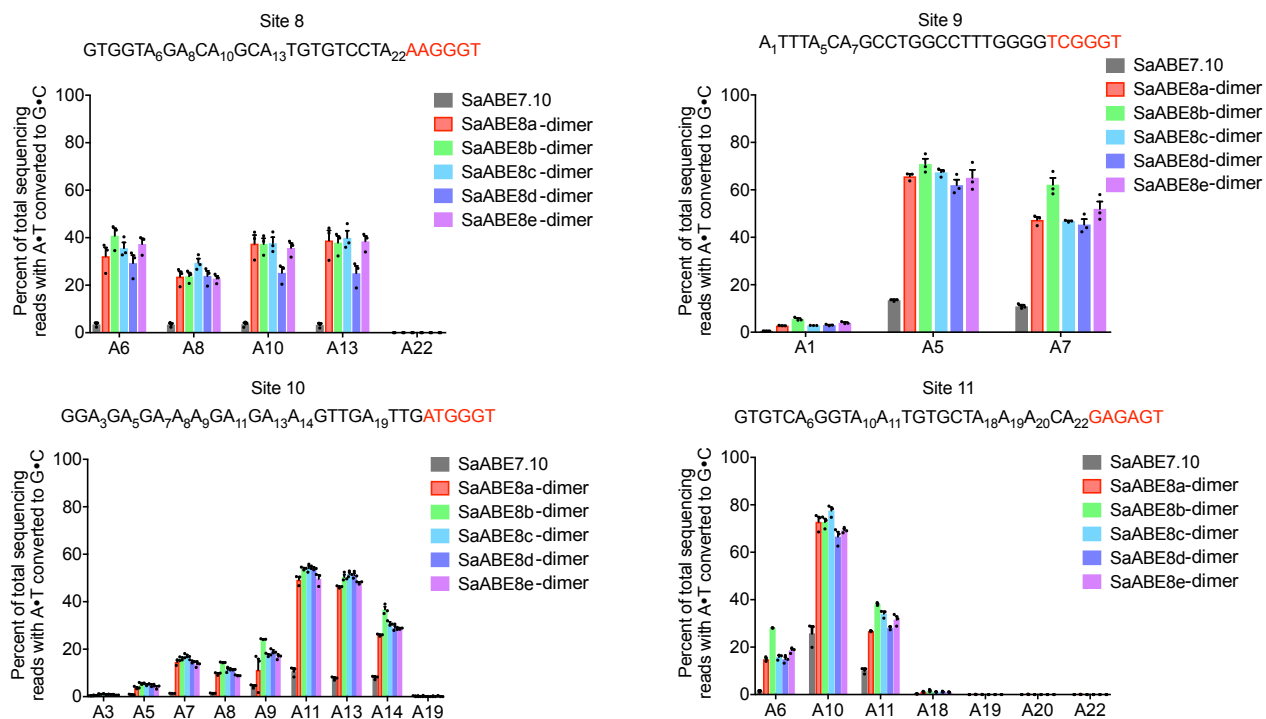**b**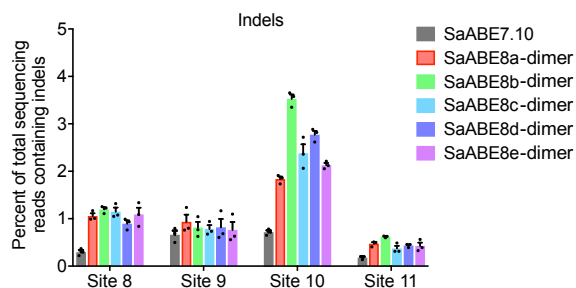

**Supplementary Figure 2. Base editing efficiencies and indel frequencies for SaABE7.10 and SaABE8a-e-dimer variants at four genomic sites in HEK293T cells.** **a**, Base editing with SaABE7.10, SaABE8a-dimer, SaABE8b-dimer, SaABE8c-dimer, SaABE8d-dimer, and SaABE8e-dimer at four genomic sites in HEK293T cells. **b**, Percent of all sequencing reads containing an indel following modification by SaABE7.10, SaABE8a-dimer, SaABE8b-dimer, SaABE8c-dimer, SaABE8d-dimer, or SaABE8e-dimer at four genomic sites in HEK293T cells. All base editors are optimized with the architecture, codon usage, and nuclear localization signals of ABEmax<sup>16</sup>. All untreated controls show no editing or indel formation at all sites. For all plots, dots represent individual biological replicates and bars represent mean $\pm$ s.d. of three independent biological replicates.

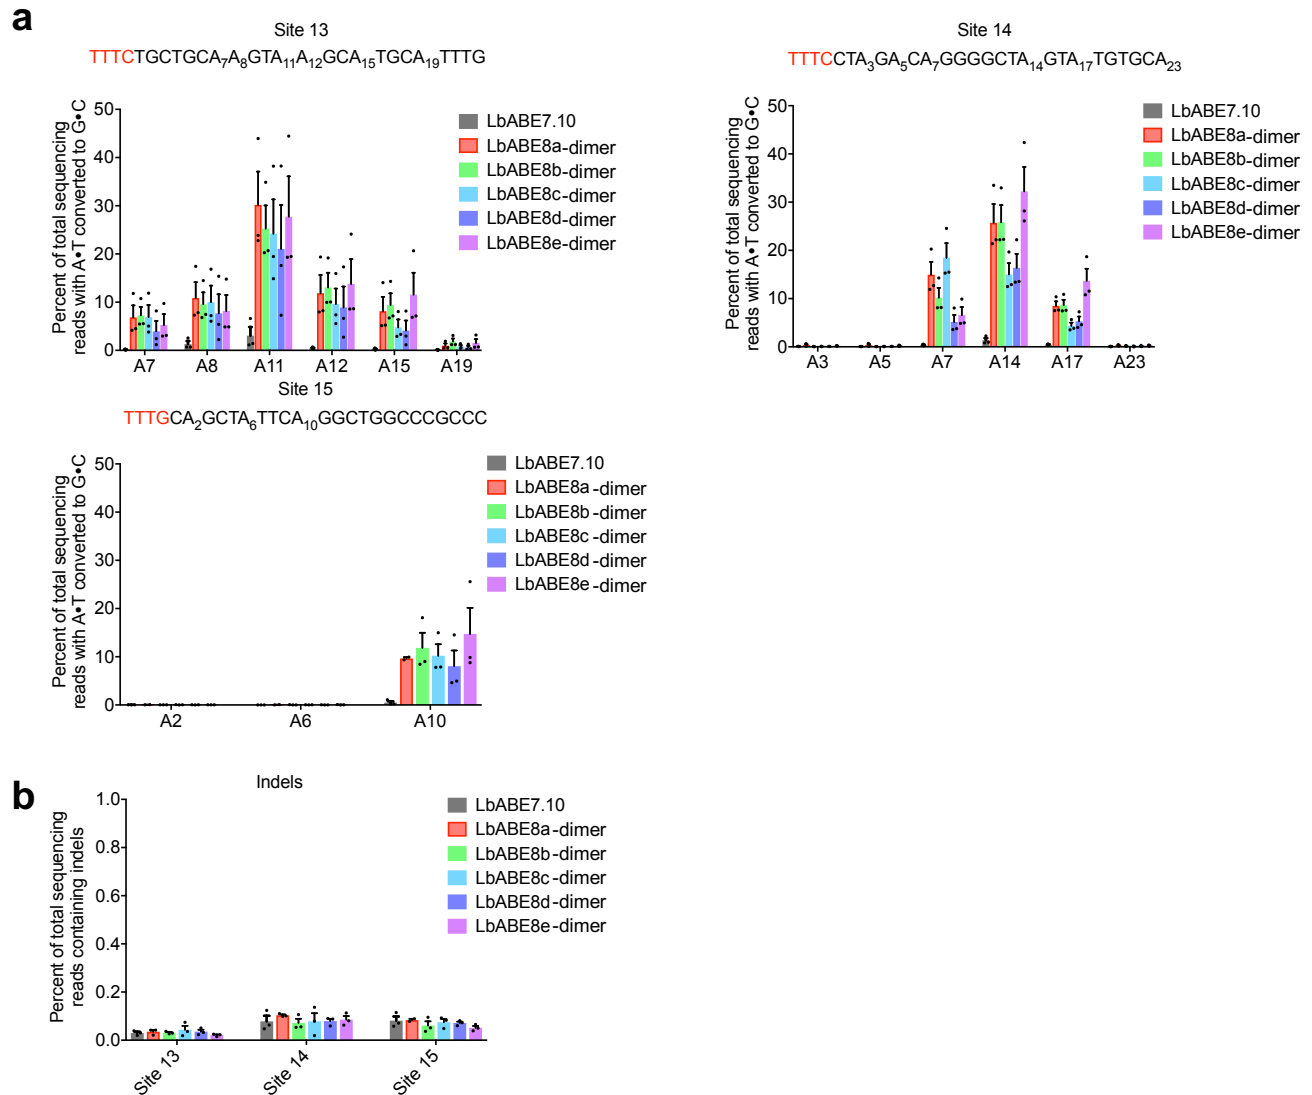

**Supplementary Figure 3. Base editing efficiencies and indel frequencies for LbABE7.10 and LbABE8a-e-dimer variants at three genomic sites in HEK293T cells.** **a**, Base editing with LbABE7.10, LbABE8a-dimer, LbABE8b-dimer, LbABE8c-dimer, LbABE8d-dimer, and LbABE8e-dimer at three genomic sites in HEK293T cells. **b**, Percent of all sequencing reads containing an indel following modification by LbABE7.10, LbABE8a-dimer, LbABE8b-dimer, LbABE8c-dimer, LbABE8d-dimer, or LbABE8e-dimer at three genomic sites in HEK293T cells. LbCas12a was used in the nuclease inactive form since the desired nickase enzyme for base editing has not been reported. Otherwise, all base editors are optimized with the architecture, codon usage, and nuclear localization signals of ABE<sub>max</sub><sup>16</sup>. All untreated controls show no editing or indel formation at all sites. For all plots, dots represent individual biological replicates and bars represent mean $\pm$ s.d. of three independent biological replicates.

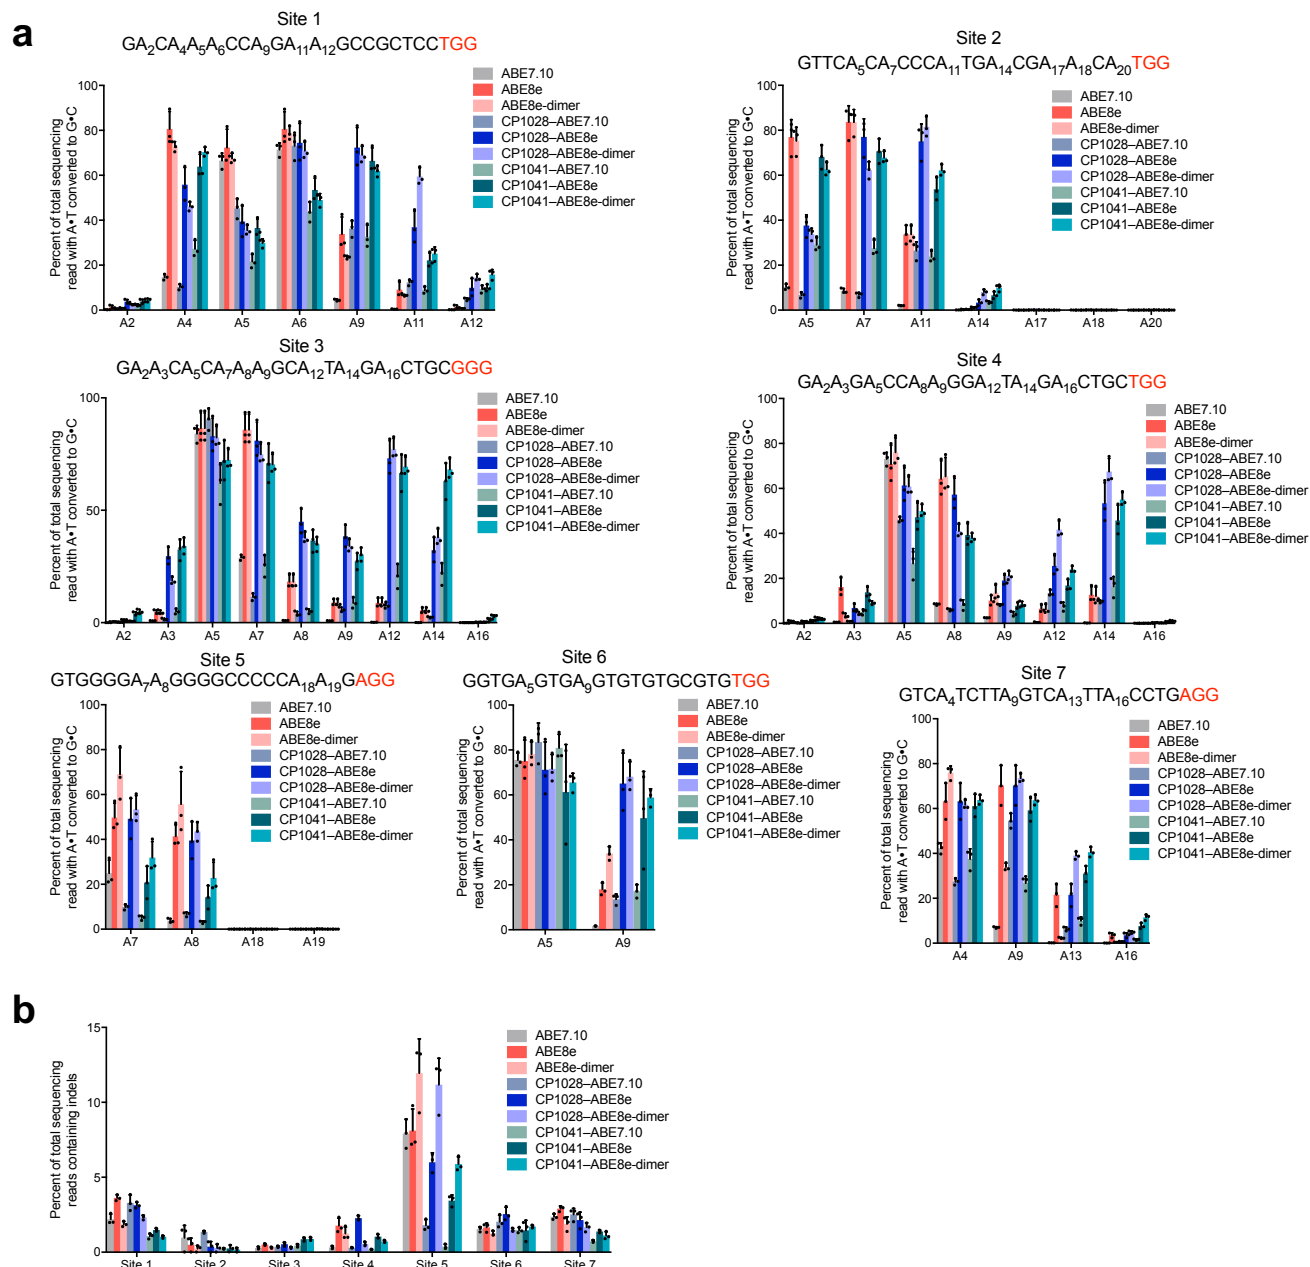

**Supplementary Figure 4. Base editing efficiencies and indel frequencies for SpABE7.10, SpABE8e, CP1028-ABE7.10, CP1028-ABE8e, CP1028-ABE8e-dimer, CP1041-ABE7.10, CP1041-ABE8e, and CP1041-ABE8e-dimer at seven genomic sites in HEK293T cells. a, Base editing with SpABE7.10, SpABE8e, CP1028-ABE7.10, CP1028-ABE8e, CP1028-ABE8e-dimer, CP1041-ABE7.10, CP1041-ABE8e, and CP1041-ABE8e-dimer at seven genomic sites in HEK293T cells. b, Percent of all sequencing reads containing an indel following modification by SpABE7.10, SpABE8e, CP1028-ABE7.10, CP1028-ABE8e, CP1028-ABE8e-dimer, CP1041-ABE7.10, CP1041-ABE8e, or CP1041-ABE8e-dimer at seven genomic sites in HEK293T cells. All untreated controls show no editing or indel formation at all sites. For all plots, dots represent individual biological replicates and bars represent mean $\pm$ s.d. of three independent biological replicates.**

**a**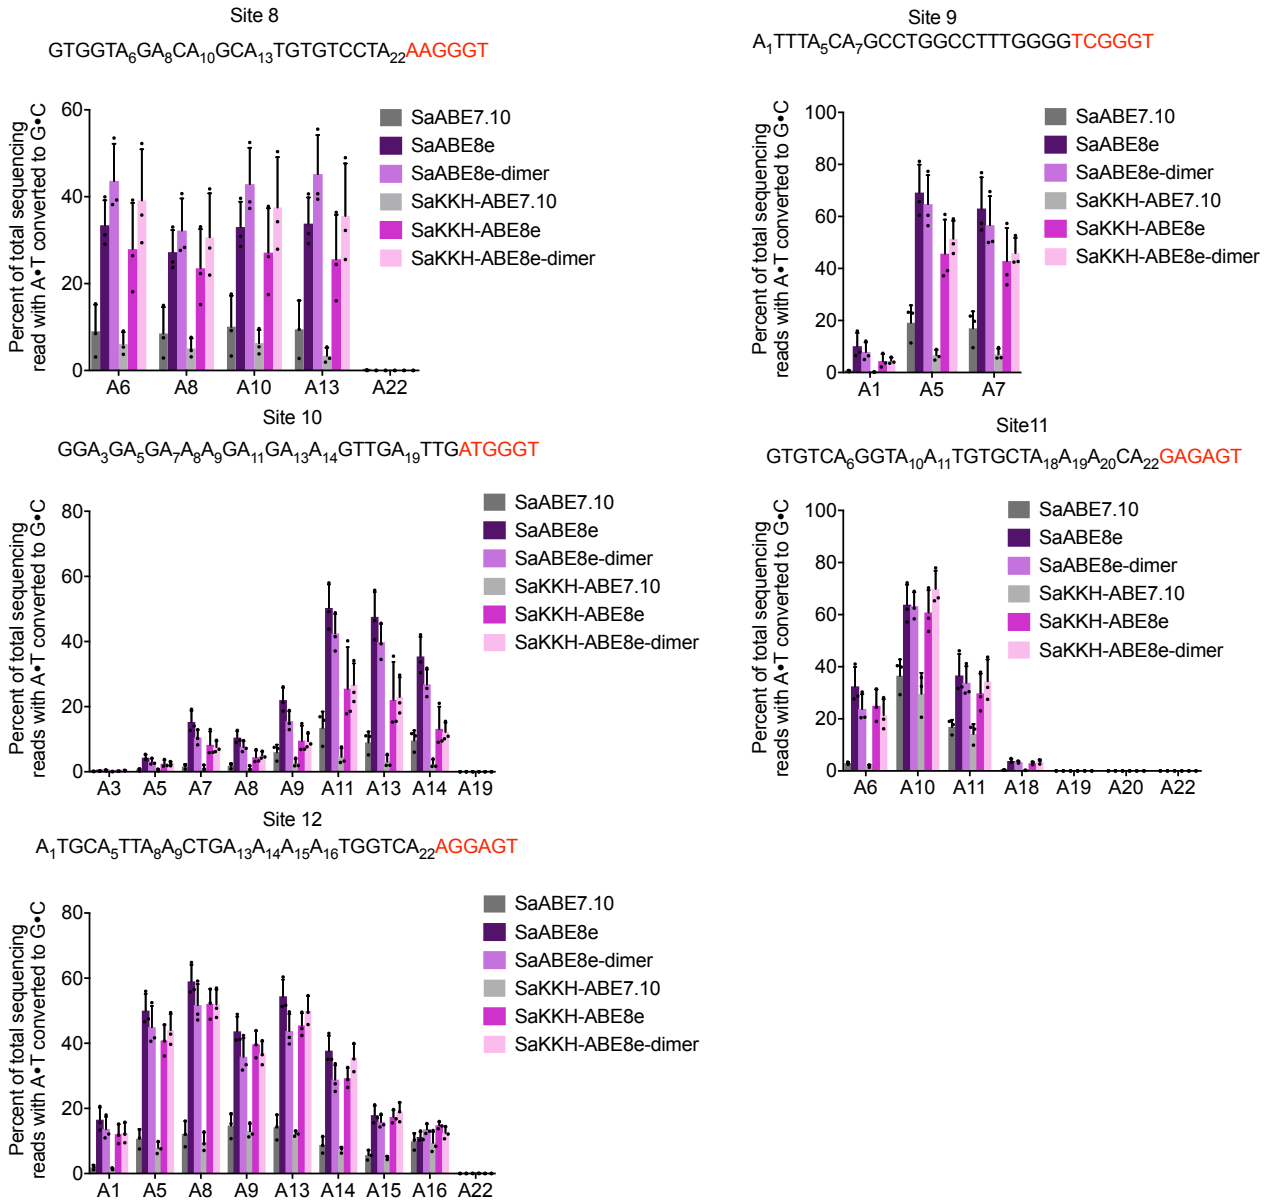**b**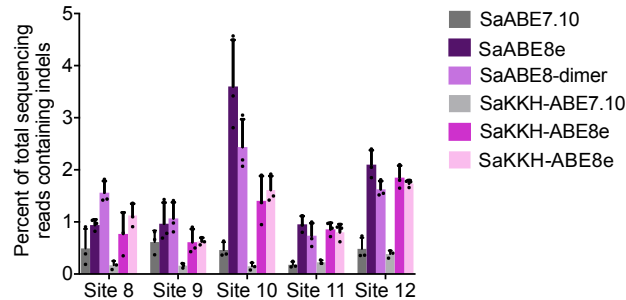

**Supplementary Figure 5. Base editing efficiencies and indel frequencies for SaABE7.10, SaABE8e, SaABE8e-dimer, SaKKH-ABE7.10, SaKKH-ABE8e, and SaKKH-ABE8e-dimer in HEK293T cells at five genomic sites with NNGRRT PAMs in HEK293T cells. a, Base editing with SaABE7.10, SaABE8e, SaABE8e-dimer, SaKKH-ABE7.10,**

SaKKH-ABE8e, and SaKKH-ABE8e-dimer in HEK293T cells at five genomic sites with NNGRRT PAMs in HEK293T cells. **b**, Percent of all sequencing reads containing an indel following modification by SaABE7.10, SaABE8e, SaABE8e-dimer, SaKKH-ABE7.10, SaKKH-ABE8e, and SaKKH-ABE8e-dimer at five genomic sites in HEK293T cells. All untreated controls show no editing or indel formation at all sites. For all plots, dots represent individual biological replicates and bars represent mean $\pm$ s.d. of three independent biological replicates.



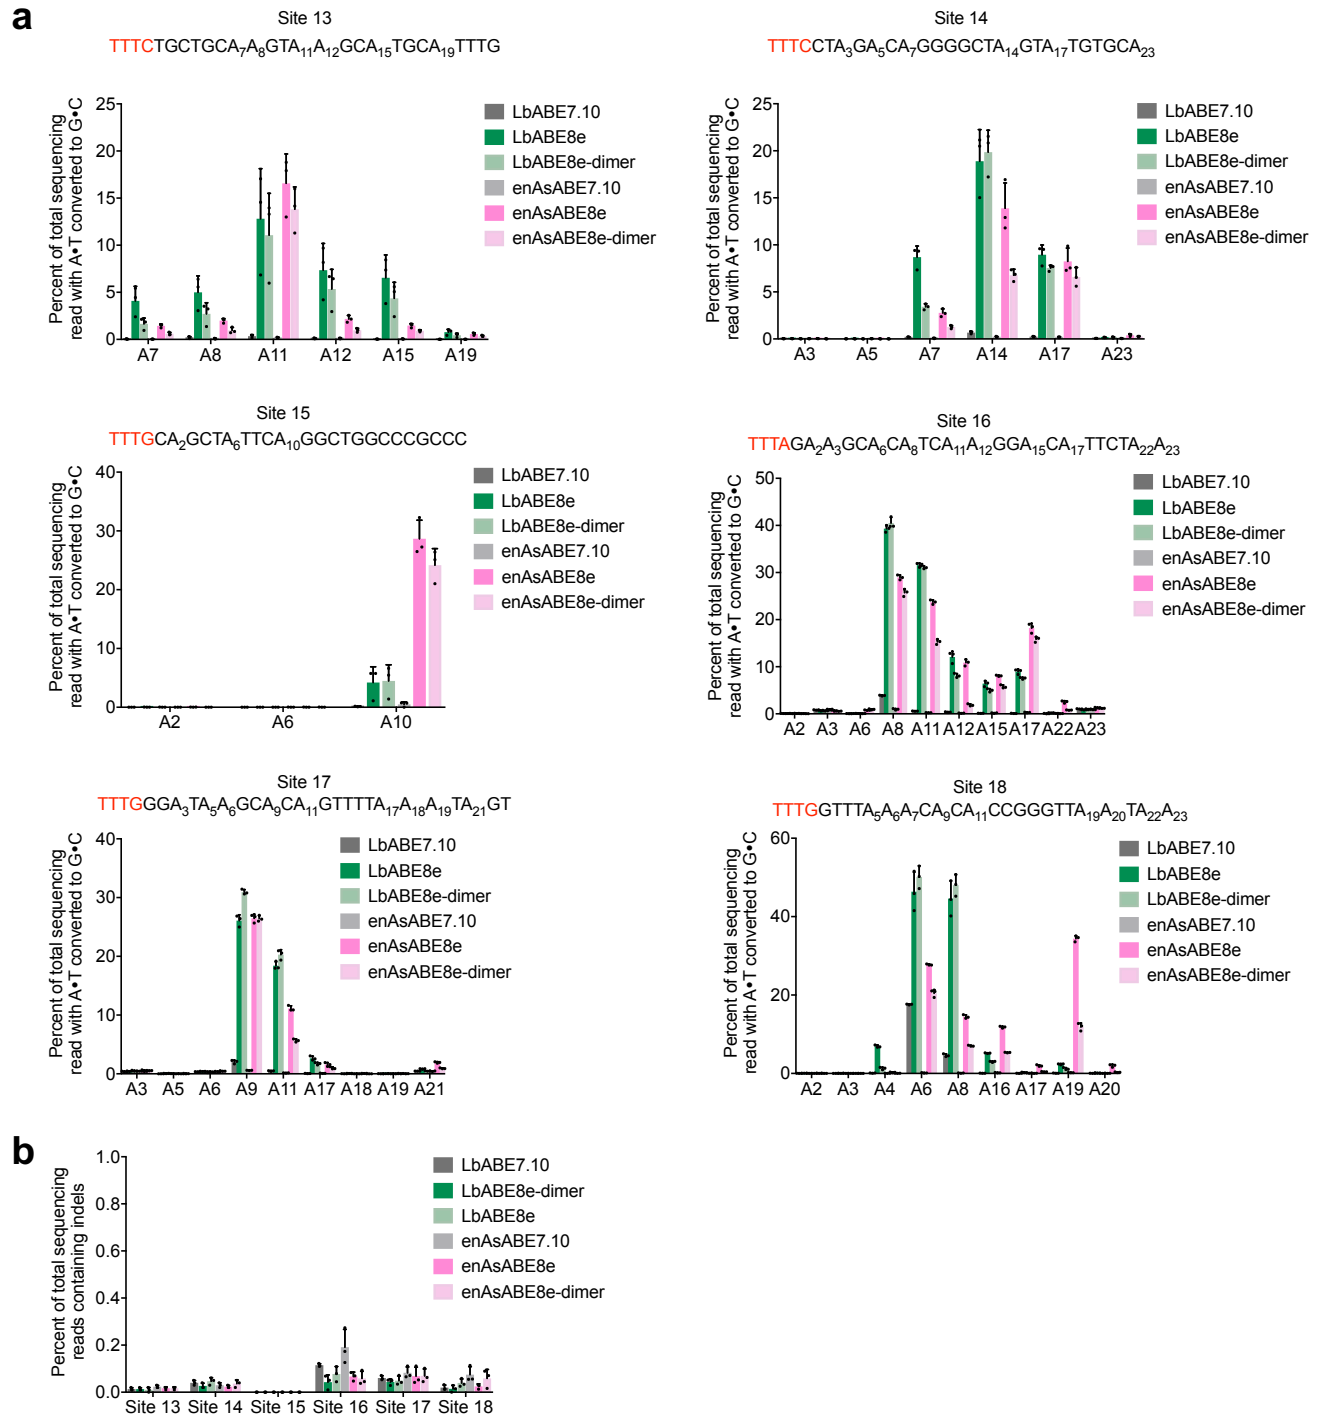

**Supplementary Figure 6. Base editing efficiencies and indel frequencies for LbABE7.10, LbABE8e, Lb-ABE8e-dimer, enAsABE7.10, enAsABE8e, and enAsABE8e-dimer in HEK293T cells at three genomic sites in HEK293T cells. a, Base editing with LbABE7.10, LbABE8e, LbABE8e-dimer, enAsABE7.10, enAsABE8e, and enAsABE8e-dimer in HEK293T cells at three genomic sites in HEK293T cells. b, Percent of all sequencing reads containing an indel following modification by LbABE7.10, LbABE8e, LbABE8e-dimer, enAsABE7.10, enAsABE8e, and enAsABE8e-dimer at three genomic sites in HEK293T cells.**

All untreated controls show no editing or indel formation at all sites. For all plots, dots represent individual biological replicates and bars represent mean $\pm$ s.d. of three independent biological replicates.

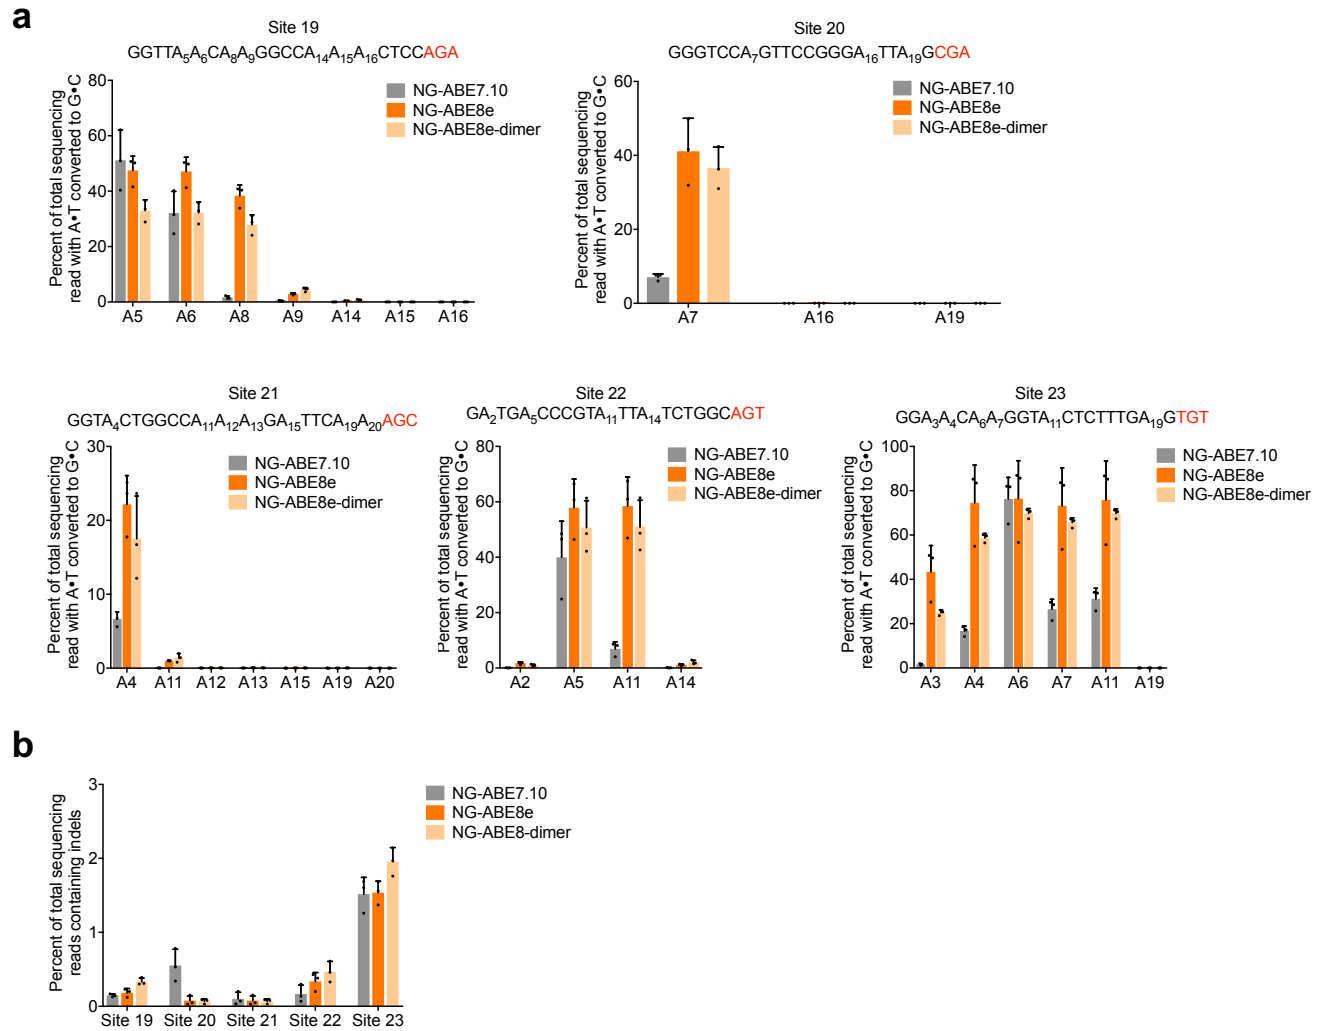

**Supplementary Figure 7. Base editing efficiencies and indel frequencies for NG-ABE7.10, NG-ABE8e, and NG-ABE8e-dimer in HEK293T cells at five genomic sites in HEK293T cells. a, Base editing with NG-ABE7.10, NG-ABE8e, and NG-ABE8e-dimer in HEK293T cells at five genomic sites in HEK293T cells. b, Percent of all sequencing reads containing an indel following modification by NG-ABE7.10, NG-ABE8e, and NG-ABE8e-dimer at five genomic sites in HEK293T cells. All untreated controls show no editing or indel formation at all sites. For all plots, dots represent individual biological replicates and bars represent mean $\pm$ s.d. of three independent biological replicates.**

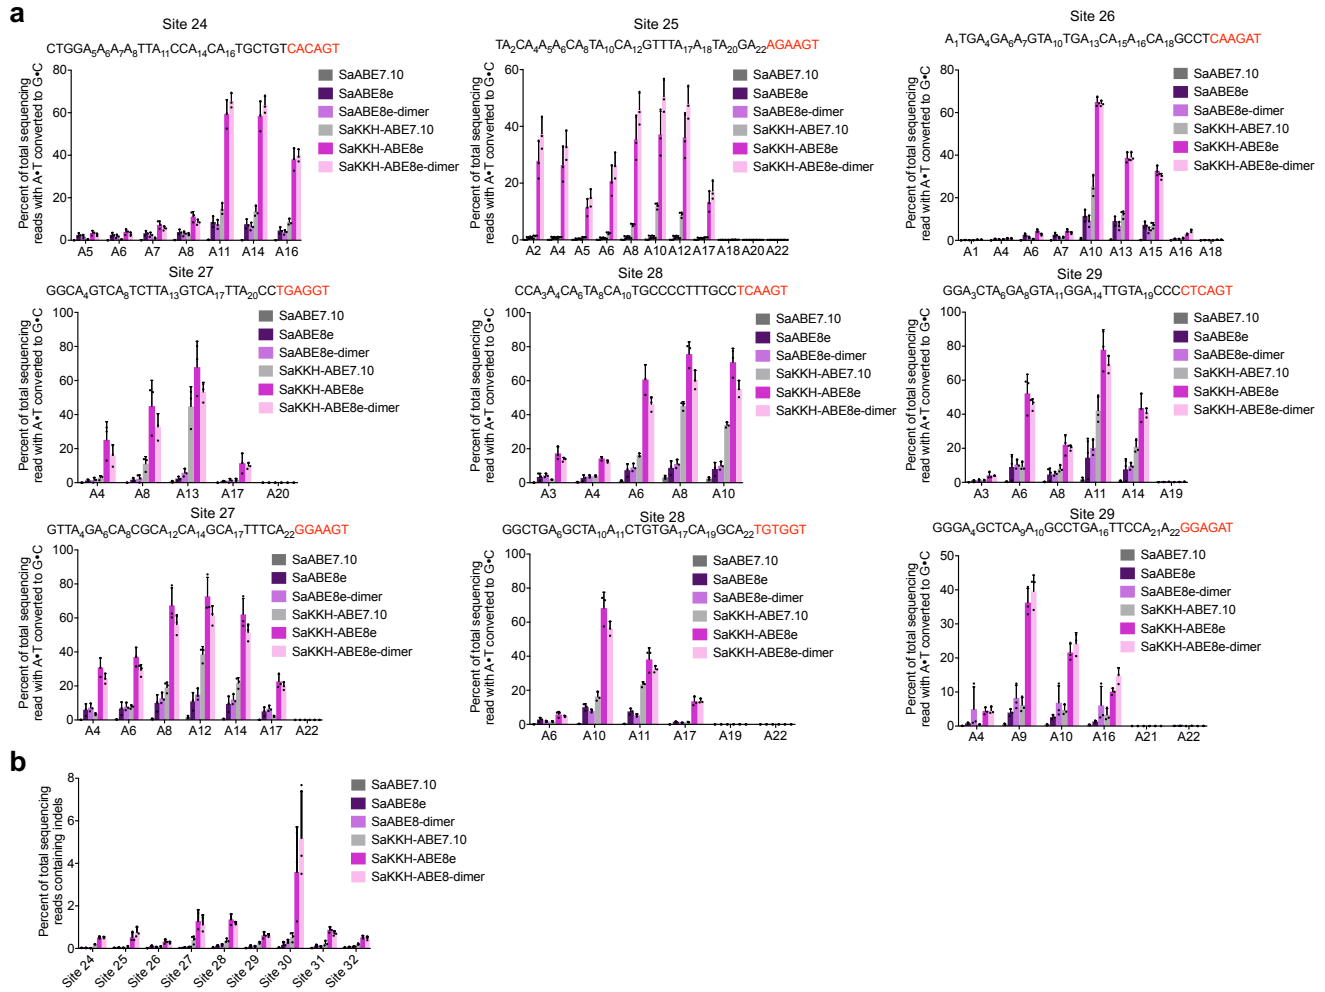

**Supplementary Figure 8. Base editing efficiencies and indel frequencies for SaABE7.10, SaABE8e, SaABE8e-dimer, SaKKH-ABE7.10, SaKKH-ABE8e, and SaKKH-ABE8e-dimer in HEK293T cells at nine genomic sites with NNHRRT PAMs in HEK293T cells. a, Base editing with SaABE7.10, SaABE8e, SaABE8e-dimer, SaKKH-ABE7.10, SaKKH-ABE8e, and SaKKH-ABE8e-dimer in HEK293T cells at nine genomic sites with NNHRRT PAMs in HEK293T cells. b, Percent of all sequencing reads containing an indel following modification by SaABE7.10, SaABE8e, SaABE8e-dimer, SaKKH-ABE7.10, SaKKH-ABE8e, and SaKKH-ABE8e-dimer at nine genomic sites in HEK293T cells. All untreated controls show no editing or indel formation at all sites. For all plots, dots represent individual biological replicates and bars represent mean $\pm$ s.d. of three independent biological replicates.**

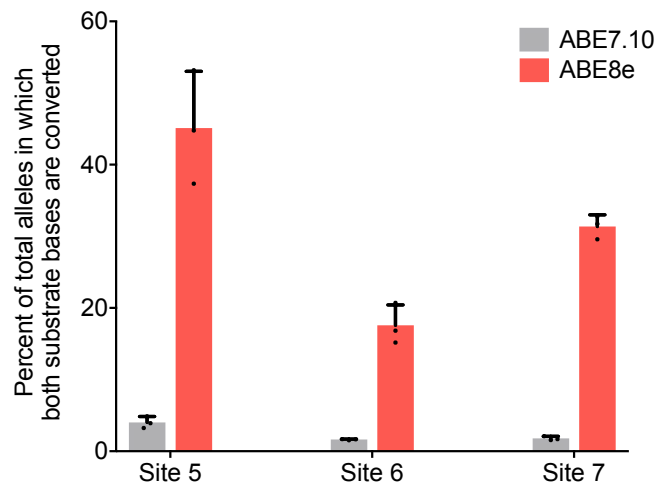

**Supplementary Figure 9. Processivity analysis for ABE7.10 and ABE8e.** Percent of all sequenced alleles in which the two target As in the editing window are both converted to Gs, following transfection with plasmids expressing ABE7.10 or ABE8e at three genomic sites in HEK293T cells. Analyses were done using the Python script provided in **Supplementary Note 1**. Dots represent individual values and bars represent mean $\pm$ s.d. of three independent biological replicates.

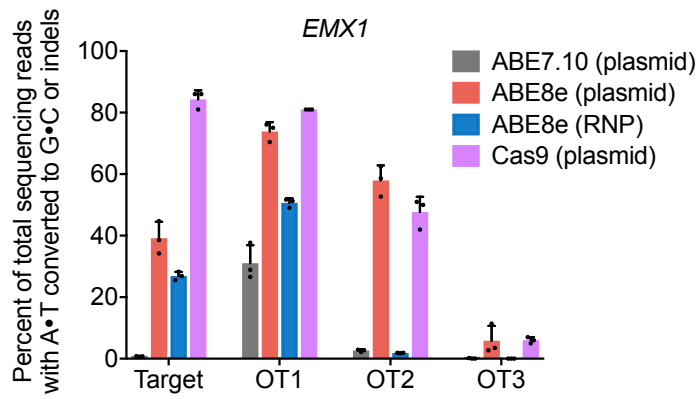

**Supplementary Figure 10.** Comparison of ABE8e and Cas9 nuclease at the top three off-target sites for *EMX1* as identified by GUIDE-Seq<sup>44</sup>. For all plots, dots represent individual biological replicates and bars represent mean $\pm$ s.d. of three independent biological replicates.

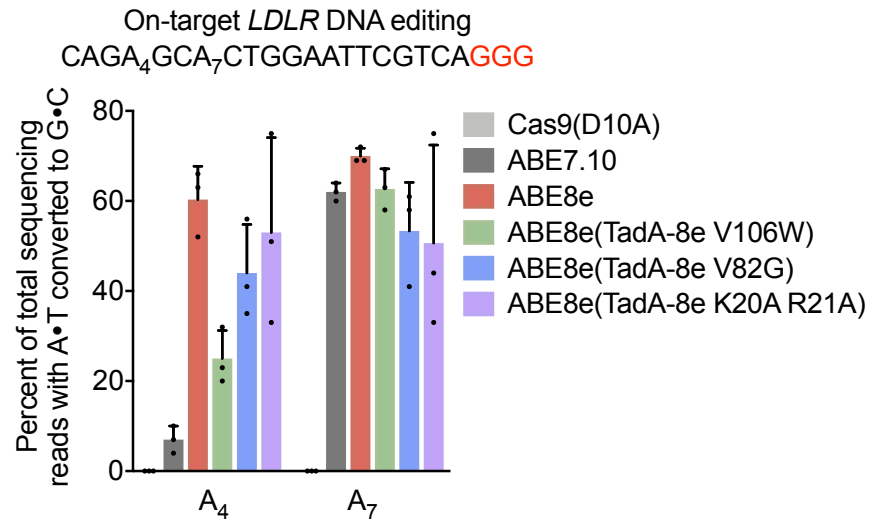

**Supplementary Figure 11. On-target DNA base editing efficiencies comparing ABE8e mutants with minimized transcriptome-wide RNA off-target editing.** Base editing with Cas9(D10A), ABE7.10, ABE8e, ABE8e(TadA-8e V106W), ABE8e(TadA-8e V82G), and ABE8e(TadA-8e K20A R21A) at the *LDLR* locus in HEK293T cells<sup>47</sup>. Editing was analyzed from RNAseq analysis. All base editors are optimized with the architecture, codon usage, and nuclear localization signals of ABEmax<sup>16</sup>. For all plots, dots represent individual biological replicates and bars represent mean $\pm$ s.d. of three independent biological replicates.

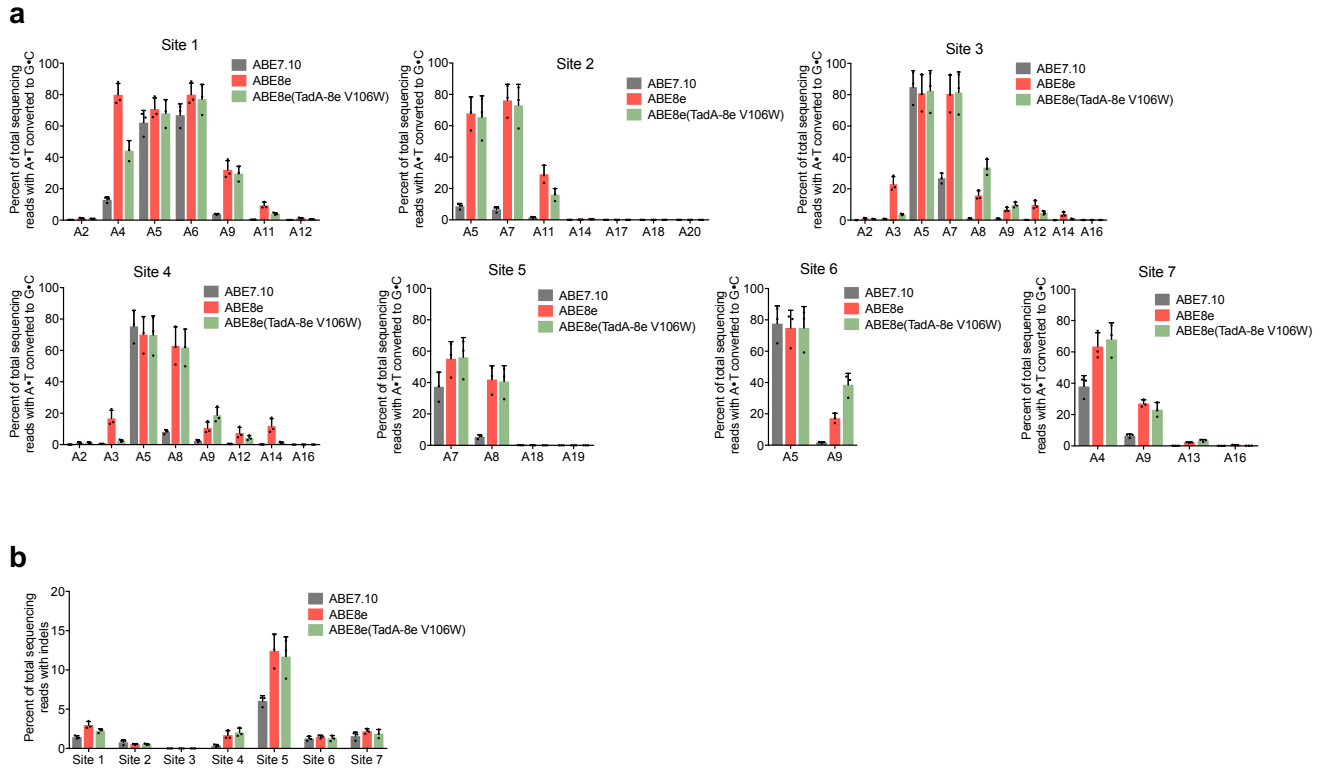

**Supplementary Figure 12. On-target base editing efficiencies and indel frequencies for ABE7.10, ABE8e, and ABE8e(TadA-8e V106W) in HEK293T cells at seven genomic sites in HEK293T cells. a, Base editing with ABE7.10, ABE8e, and ABE8e(TadA-8e V106W) in HEK293T cells at seven genomic sites in HEK293T cells. b, Percent of all sequencing reads containing an indel following modification by ABE7.10, ABE8e, and ABE8e(TadA-8e V106W) at seven genomic sites in HEK293T cells. All untreated controls show no editing or indel formation at all sites. For all plots, dots represent individual biological replicates and bars represent mean $\pm$ s.d. of three independent biological replicates.**



**a**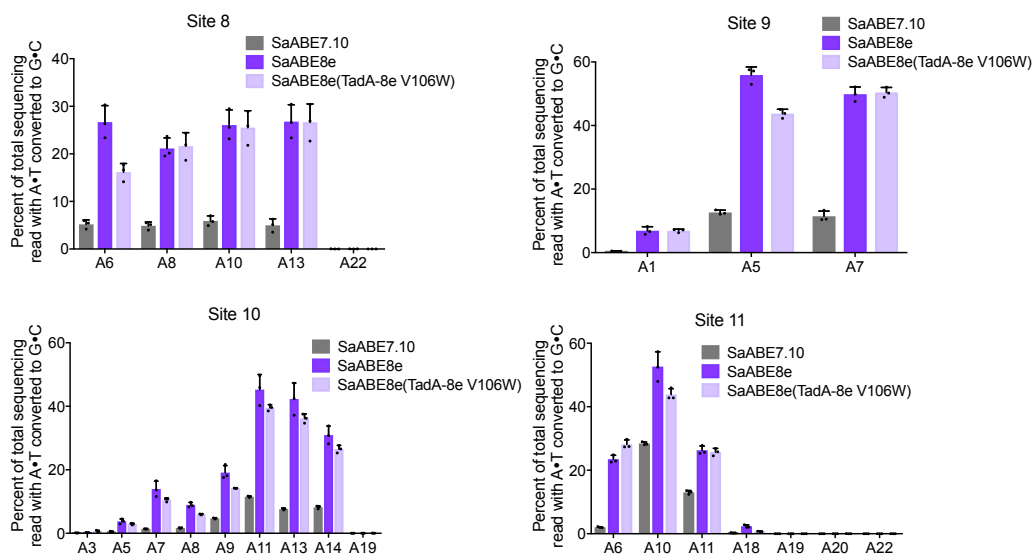**b**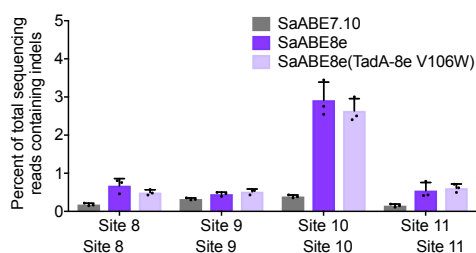

**Supplementary Figure 13. On-target base editing efficiencies and indel frequencies for SaABE7.10, SaABE8e, and SaABE8e(TadA-8e V106W) in HEK293T cells at seven genomic sites in HEK293T cells.** **a**, Base editing with SaABE7.10, SaABE8e, and SaABE8e(TadA-8e V106W) in HEK293T cells at seven genomic sites in HEK293T cells. **b**, Percent of all sequencing reads containing an indel following modification by SaABE7.10, SaABE8e, and SaABE8e(TadA-8e V106W) at seven genomic sites in HEK293T cells. All untreated controls show no editing or indel formation at all sites. For all plots, dots represent individual biological replicates and bars represent mean ± s.d. of three independent biological replicates.

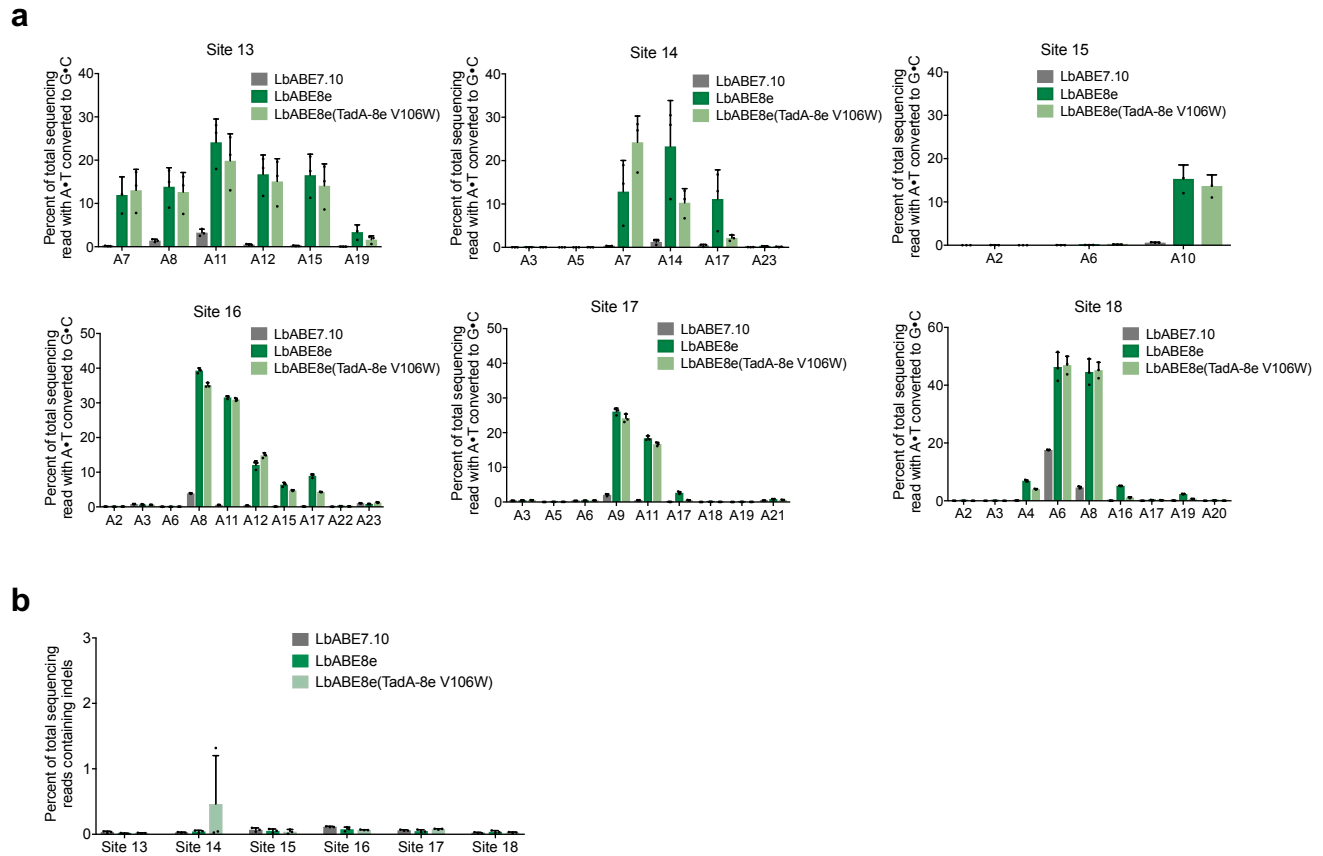

**Supplementary Figure 14. On-target base editing efficiencies and indel frequencies for LbABE7.10, LbABE8e, and LbABE8e(TadA-8e V106W) in HEK293T cells at seven genomic sites in HEK293T cells. a, Base editing with LbABE7.10, LbABE8e, and LbABE8e(TadA-8e V106W) in HEK293T cells at seven genomic sites in HEK293T cells. b, Percent of all sequencing reads containing an indel following modification by LbABE7.10, LbABE8e, and LbABE8e(TadA-8e V106W) at seven genomic sites in HEK293T cells. All untreated controls show no editing or indel formation at all sites. For all plots, dots represent individual biological replicates and bars represent mean  $\pm$  s.d. of three independent biological replicates.**

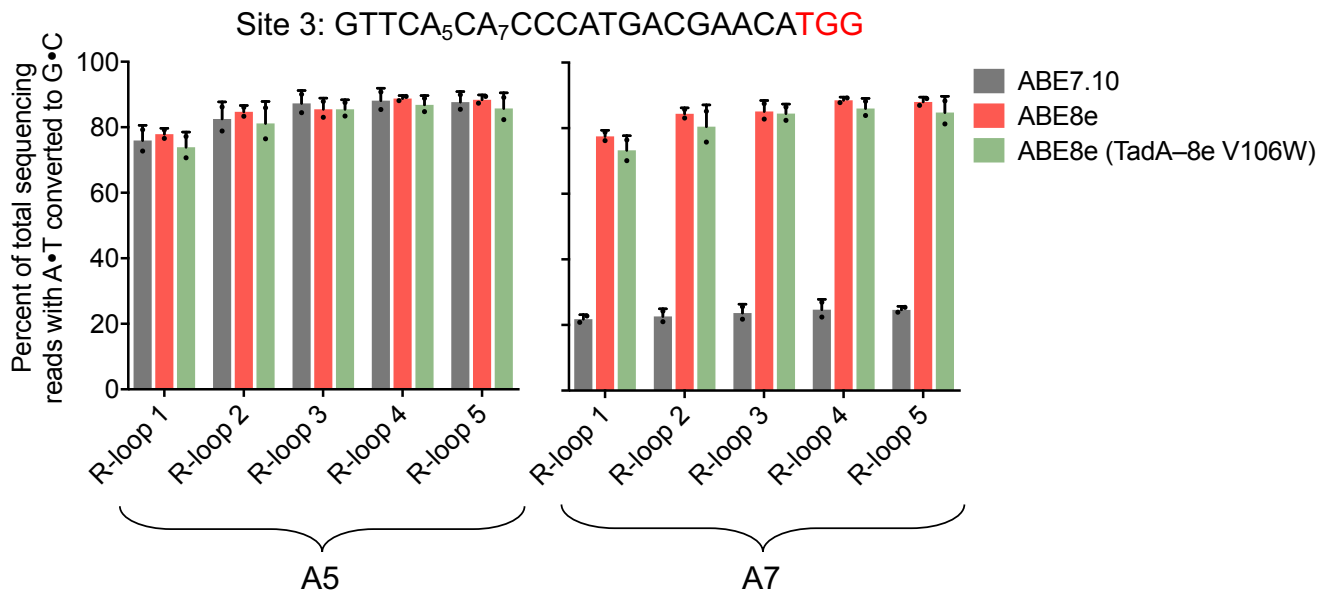

**Supplementary Figure 15. On-target base editing efficiencies and indel frequencies for ABE7.10, ABE8e, and ABE8e(TadA-8e V106W) in HEK293T cells at site 3 in HEK293T cells for the orthogonal R-loop assay. a, Base editing with ABE7.10, ABE8e, and ABE8e (TadA-8e V106W) in HEK293T cells at site 3. For all plots, dots represent individual biological replicates and bars represent mean $\pm$ s.d. of three independent biological replicates.**





| Circuits         | Plasmid 1 (AP)                                                                             | Plasmid 2 (P2)                                                     | Plasmid 3 (P3)                                                               |
|------------------|--------------------------------------------------------------------------------------------|--------------------------------------------------------------------|------------------------------------------------------------------------------|
| <b>P1+P2+P3a</b> | <b>pBT120a17</b><br>proT7.sd8.gIII.luxAB,<br>proLac.sgRNA, SC101-<br>E93K, Cb <sup>R</sup> | <b>pBT128c</b><br>proC.SD8.intC.dCas9,<br>p15a, Km <sup>R</sup>    | <b>pMR-A-3</b><br>proD.SD8.T7-RNAP(R57*<br>Q58*), ColE1, Sp <sup>R</sup>     |
| <b>P1+P2+P3b</b> | <b>pBT120a17</b><br>proT7.sd8.gIII.luxAB,<br>proLac.sgRNA, SC101-<br>E93K, Cb <sup>R</sup> | <b>pBT128c</b><br>proC.SD8.intC.dCas9,<br>p15a, Km <sup>R</sup>    | <b>pMR-A-4</b><br>proC.SD8.T7-RNAP(R57*<br>Q58*), ColE1, Sp <sup>R</sup>     |
| <b>P1+P2+P3c</b> | <b>pBT120a17</b><br>proT7.sd8.gIII.luxAB,<br>proLac.sgRNA, SC101-<br>E93K, Cb <sup>R</sup> | <b>pBT128c</b><br>proC.SD8.intC.dCas9,<br>p15a, Km <sup>R</sup>    | <b>pMR-A-5</b><br>proB.SD8.T7-RNAP(R57*<br>Q58*), ColE1, Sp <sup>R</sup>     |
| <b>P1+P2+P3d</b> | <b>pBT120a17</b><br>proT7.sd8.gIII.luxAB,<br>proLac.sgRNA, SC101-<br>E93K, Cb <sup>R</sup> | <b>pBT128c</b><br>proC.SD8.intC.dCas9,<br>p15a, Km <sup>R</sup>    | <b>pMR-A-6</b><br>proA.SD8.T7-RNAP(R57*<br>Q58*), ColE1, Sp <sup>R</sup>     |
| <b>P1+P2+P3e</b> | <b>pBT120a17</b><br>proT7.sd8.gIII.luxAB,<br>proLac.sgRNA, SC101-<br>E93K, Cb <sup>R</sup> | <b>pBT44c</b><br>proC.SD8.intC.dCas9.ugi,<br>p15a, Km <sup>R</sup> | <b>pBT138b-proD</b><br>proD.R4.T7-RNAP(R57*<br>Q58*), ColE1, Sp <sup>R</sup> |
| <b>P1+P2+P3f</b> | <b>pBT120a17</b><br>proT7.sd8.gIII.luxAB,<br>proLac.sgRNA, SC101-<br>E93K, Cb <sup>R</sup> | <b>pBT44c</b><br>proC.SD8.intC.dCas9.ugi,<br>p15a, Km <sup>R</sup> | <b>pBT138b-proB</b><br>proC.R4.T7-RNAP(R57*<br>Q58*), ColE1, Sp <sup>R</sup> |
| <b>P1+P2+P3g</b> | <b>pBT120a17</b><br>proT7.sd8.gIII.luxAB,<br>proLac.sgRNA, SC101-<br>E93K, Cb <sup>R</sup> | <b>pBT44c</b><br>proC.SD8.intC.dCas9.ugi,<br>p15a, Km <sup>R</sup> | <b>pBT138b-proA</b><br>proB.R4.T7-RNAP(R57*<br>Q58*), ColE1, Sp <sup>R</sup> |
| <b>P1+P2+P3h</b> | <b>pBT120a17</b><br>proT7.sd8.gIII.luxAB,<br>proLac.sgRNA, SC101-<br>E93K, Cb <sup>R</sup> | <b>pBT44c</b><br>proC.SD8.intC.dCas9.ugi,<br>p15a, Km <sup>R</sup> | <b>pBT138b-pro1</b><br>proA.R4.T7-RNAP(R57*<br>Q58*), ColE1, Sp <sup>R</sup> |

**Supplementary Table 1.** Gene circuit components. An asterisks (\*) indicates a stop codon.

| Passage | PANCE 1, Pool 1<br>(P1+P2+P3a ; input phage: TadA(7.10)) | PANCE 1, Pool 2<br>(P1+P2+P3b; input phage: TadA(7.10)) | PANCE 2, Pool 1<br>(P1+P2+P3e; input phage: PANCE 1, Pool 1) | PANCE 2, Pool 2<br>(P1+P2+P3g; input phage: PANCE 1, Pool 2) | PANCE 2, Pool 3<br>(P1+P2+P3g; input phage: PANCE 1, Pool 1) | PANCE 2, Pool 4<br>(P1+P2+P3g; input phage: PANCE 1, Pool 2) |
|---------|----------------------------------------------------------|---------------------------------------------------------|--------------------------------------------------------------|--------------------------------------------------------------|--------------------------------------------------------------|--------------------------------------------------------------|
| 1       | 1:100 + drift                                            | 1:100 + drift                                           | 1:50                                                         | 1:50                                                         | 1:50                                                         | 1:50                                                         |
| 2       | 1:50                                                     | 1:50                                                    | 1:50                                                         | 1:50                                                         | 1:50                                                         | 1:50                                                         |
| 3       | 1:50                                                     | 1:50                                                    | 1:50                                                         | 1:50                                                         | 1:50                                                         | 1:50                                                         |
| 4       | 1:100                                                    | 1:100                                                   | 1:50                                                         | 1:50                                                         | 1:50                                                         | 1:50                                                         |
| 5       | 1:100 + drift                                            | 1:100 + drift                                           | 1:50                                                         | 1:50                                                         | 1:50                                                         | 1:50                                                         |
| 6       | 1:100                                                    | 1:100                                                   | 1:50                                                         | 1:50                                                         | 1:50                                                         | 1:50                                                         |
| 7       | 1:100 + drift                                            | 1:100 + drift                                           | 1:50                                                         | 1:50                                                         | 1:50                                                         | 1:50                                                         |
| 8       | 1:100                                                    | 1:100                                                   | 1:50                                                         | 1:50                                                         | 1:50                                                         | 1:50                                                         |
| 9       | 1:100                                                    | 1:100                                                   | 1:50                                                         | 1:50                                                         | 1:50                                                         | 1:50                                                         |
| 10      | 1:100                                                    | 1:100                                                   | 1:50                                                         | 1:50                                                         | 1:50                                                         | 1:50                                                         |
| 11      | 1:200                                                    | 1:200                                                   |                                                              |                                                              |                                                              |                                                              |
| 12      | 1:200                                                    | 1:200                                                   |                                                              |                                                              |                                                              |                                                              |
| 13      | 1:500                                                    | 1:500                                                   |                                                              |                                                              |                                                              |                                                              |
| 14      | 1:500                                                    | 1:500                                                   |                                                              |                                                              |                                                              |                                                              |
| 15      | 1:1000                                                   | 1:1000                                                  |                                                              |                                                              |                                                              |                                                              |

**Supplementary Table 2.** Selection schedule for PANCE. For the first phase of PANCE (PANCE 1), two selections were performed in parallel using host cells harboring P1, P2, and either P3a or P3b. For the second phase of PANCE (PANCE 2), four selections were performed in parallel, two in host cells harboring P1, P2, and P3e, and two in host cells harboring P1, P2, and P3g. For details on plasmids, see **Supplementary Table 1**. Following the final passage of PANCE 2 (25 total passages), all phage were pooled and used as the starting point for PACE.

**Supplementary Table 3.** Protospacer sequences for mammalian genomic sites.

| Site #                    | Protospacer             | PAM    |
|---------------------------|-------------------------|--------|
| 1                         | GACAAACCAGAAGCCGCTCC    | TGG    |
| 2                         | G TTCACACCCATGACGAACA   | TGG    |
| 3                         | GAACACAAAGCATAGACTGC    | GGG    |
| 4                         | GAAGACCAAGGATAGACTGC    | TGG    |
| 5                         | GTGGGGAAGGGGCCCAAG      | AGG    |
| 6                         | GGTGAGTGAGTGTGTGCGTG    | TGG    |
| 7                         | GTCATCTTAGTCATTACCTG    | AGG    |
| 8                         | GTGGTAGACAGCATGTGTCCTA  | AAGGGT |
| 9                         | ATTTACAGCCTGGCCTTTGGGG  | TCGGGT |
| 10                        | GGAGAGAAAGAGAAGTTGATTG  | ATGGGT |
| 11                        | GTGTCAGGTAATGTGCTAAACA  | GAGAGT |
| 12                        | ATGCATTAAGTAAAATGGTCA   | AGGAGT |
| 13                        | TGCTGCAAGTAAGCATGCATTTG | TTTC   |
| 14                        | CTAGACAGGGGCTAGTATGTGCA | TTTC   |
| 15                        | CAGCTATTCAGGCTGGCCCGCCC | TTTG   |
| 16                        | GAAGCACATCAAGGACATTCTAA | TTTA   |
| 17                        | GGATAAGCACAGTTTTAAATAGT | TTTG   |
| 18                        | GTTTAAACACACCGGGTTAATAA | TTTG   |
| 19                        | GGTTAACAAGGCCAAACTCC    | AGAT   |
| 20                        | GGGTCCAGTTCGGGATTAG     | CGAA   |
| 21                        | GGTACTGGCCAAAGATTCAA    | AGCC   |
| 22                        | GATGACCCGTATTATCTGGC    | AGTT   |
| 23                        | GGAACAAGGTACTCTTTGAG    | TGTT   |
| 24                        | CTGGAAAATTACCACATGCTGT  | CACAGT |
| 25                        | TACAAACATACAGTTTAATAGA  | AGAAGT |
| 26                        | ATGAGAAGTATGACAACAGCCT  | CAAGAT |
| 27                        | GGCAGTCATCTTAGTCATTACC  | TGAGGT |
| 28                        | CCAACATACATGCCCTTTGCC   | TCAAGT |
| 29                        | GGACTAGAGTAGGATTGTACCC  | CTCAGT |
| 30                        | GTTAGACACGCACAGCATTTC   | GGAAGT |
| 31                        | GGCTGAGCTAACTGTGACAGCA  | TGTGGT |
| 32                        | GGGAGCTCAAGCCTGATTCCAA  | GGAGAT |
| Site 5, OT1               | GGTGGGATGGGGTCCCAAG     | TGG    |
| Site 5, OT2               | GGTAGGGAGAGGCCCCCAAG    | GGG    |
| Site 5, OT3               | GGTGGGGAGCGGCCCCCAAG    | TGG    |
| EMX1                      | GAGTCCGAGCAGAAGAAGAA    | GGG    |
| EMX1, OT1                 | GAGTTAGAGCAGAAGAAGAA    | AGG    |
| EMX1, OT2                 | GAGTCTAAGCAGAAGAAGAA    | GAG    |
| EMX1, OT3                 | GAGGCCGAGCAGAAGAAGAA    | CGG    |
| VEGFA3, OT4               | GAGTGAGTGAGTGTGTGTGTG   | GGG    |
| VEGFA3, OT6               | GTGTGAGTAAGTGTGTGTGTG   | TGG    |
| VEGFA3, 12                | GGTGAGTGTGTGTGTGCATG    | TGG    |
| R-loop 1                  | GTGGTAGACAGCATGTGTCCTA  | AAGGGT |
| R-loop 2                  | ATTTACAGCCTGGCCTTTGGGG  | TCGGGT |
| R-loop 3                  | GTGTCAGGTAATGTGCTAAACA  | GAGAGT |
| R-loop 4                  | GGTGGAGGAGGGTGCATGGGGT  | CAGAAT |
| R-loop 5                  | TCTGCTTCTCCAGCCCTGGC    | CTGGGT |
| -198 target               | GTGGGGAAGGGGCCCAAG      | AGG    |
| -175 target               | ATATTTGCATTGAGATAGTG    | TGG    |
| <i>BCL11A</i><br>enhancer | TTTATCACAGGCTCCAGGAA    | GGG    |



**Supplementary Table 4.** Primers used for mammalian cell genomic DNA amplification.

| Site #        | HTS Forward Primer                                                | HTS Reverse Primer                                        |
|---------------|-------------------------------------------------------------------|-----------------------------------------------------------|
| 1             | ACACTCTTTCCCTACACGACGCTCTTCCGATCTN<br>NNNAGCCCTCTTTTATTGGAAGTGTG  | TGGAGTTCAGACGTGTGCTCTTCCGATCTC<br>CGACTGGTCCACTTACCTA     |
| 2             | ACACTCTTTCCCTACACGACGCTCTTCCGATCTN<br>NNNCTGACTCAGCCCTGCAAAGG     | TGGAGTTCAGACGTGTGCTCTTCCGATCTC<br>AAGTCAGGGGAGCGTGTC      |
| 3             | ACACTCTTTCCCTACACGACGCTCTTCCGATCTN<br>NNNCCAGCCCCTCTGTCAAAGT      | TGGAGTTCAGACGTGTGCTCTTCCGATCTT<br>GAATGGATTCTTGGAAACAATGA |
| 4             | ACACTCTTTCCCTACACGACGCTCTTCCGATCTN<br>NNNTTGCTTATTGCTGAGGGGCA     | TGGAGTTCAGACGTGTGCTCTTCCGATCTA<br>CCTCTCTCCTCCAGCTGAG     |
| 5             | ACACTCTTTCCCTACACGACGCTCTTCCGATCTN<br>NNNGTAGAAATGGGGTCTTGCTTTG   | TGGAGTTCAGACGTGTGCTCTTCCGATCTT<br>TGAGTCTATCGAGTGTGTGCAT  |
| 6<br>(VEGFA3) | ACACTCTTTCCCTACACGACGCTCTTCCGATCTN<br>NNNGTGCAGACGGCAGTCACTAGG    | TGGAGTTCAGACGTGTGCTCTTCCGATCTC<br>TATTGGAATCCTGGAGTGACCC  |
| 7             | ACACTCTTTCCCTACACGACGCTCTTCCGATCTN<br>NNNAACGGAAGTCAACCATTAAGCA   | TGGAGTTCAGACGTGTGCTCTTCCGATCTC<br>CAACATACAGAAGTCAGGAATGC |
| 8             | ACACTCTTTCCCTACACGACGCTCTTCCGATCTN<br>NNNTGCAGTCTCCTGCTTCTCTG     | TGGAGTTCAGACGTGTGCTCTTCCGATTGG<br>TGGAGTGCTCTGTGTTG       |
| 9             | ACACTCTTTCCCTACACGACGCTCTTCCGATCTN<br>NNNGGACATTTCCACCGCAAATG     | TGGAGTTCAGACGTGTGCTCTTCCGATGCT<br>ACAGAAAGGTCAGCAGC       |
| 10            | ACACTCTTTCCCTACACGACGCTCTTCCGATCTN<br>NNNTCACTTCAGCCCAGGAGTAT     | TGGAGTTCAGACGTGTGCTCTTCCGATCTT<br>GTGTATGGTGAGAGGTAGGGA   |
| 11            | ACACTCTTTCCCTACACGACGCTCTTCCGATCTN<br>NNNCTGCACCTAGCCTCCATGTC     | TGGAGTTCAGACGTGTGCTCTTCCGATCTG<br>CTGTGGCATCCAGAGACAT     |
| 12            | ACACTCTTTCCCTACACGACGCTCTTCCGATCTN<br>NNNGATTAGTGCTCAAAATAAGTTGTC | TGGAGTTCAGACGTGTGCTCTTCCGATCTA<br>TTGACATTCCTAACTTCAACGTA |
| 13            | ACACTCTTTCCCTACACGACGCTCTTCCGATCTN<br>NNNATGTGGGCTGCCTAGAAAGG     | TGGAGTTCAGACGTGTGCTCTTCCGATCTC<br>CCAGCCAAACTTGTCAACC     |
| 14            | ACACTCTTTCCCTACACGACGCTCTTCCGATCTN<br>NNNATGTGGGCTGCCTAGAAAGG     | TGGAGTTCAGACGTGTGCTCTTCCGATCTC<br>CCAGCCAAACTTGTCAACC     |
| 15            | ACACTCTTTCCCTACACGACGCTCTTCCGATCTN<br>NNNCCAGCCCCTCTGTCAAAGT      | TGGAGTTCAGACGTGTGCTCTTCCGATCTT<br>GAATGGATTCTTGGAAACAATGA |
| 16            | ACACTCTTTCCCTACACGACGCTCTTCCGATCTN<br>NNNAAAAGGGGCAAGCTTCAGAT     | TGGAGTTCAGACGTGTGCTCTTCCGATCTA<br>GTGAGGAGAAGGCAGGAGG     |
| 17            | ACACTCTTTCCCTACACGACGCTCTTCCGATCTN<br>NNNTGTTCTGCCCTCACAGAGGT     | TGGAGTTCAGACGTGTGCTCTTCCGATCCC<br>AAAGGACATACGGGGAG       |
| 18            | ACACTCTTTCCCTACACGACGCTCTTCCGATCTN<br>NNNGTGCCTGCTTCTTACATGCC     | TGGAGTTCAGACGTGTGCTCTTCCGATCCA<br>AGTATGCCTTAAAGCAGAACAA  |
| 19            | ACACTCTTTCCCTACACGACGCTCTTCCGATCTN<br>NNNGCTTTAAACATTTGTCTGTGCG   | TGGAGTTCAGACGTGTGCTCTTCCGATCTG<br>TTTTCTGTCCCTCCCTCAGTA   |
| 20            | ACACTCTTTCCCTACACGACGCTCTTCCGATCTN<br>NNNGCTTTAAACATTTGTCTGTGCG   | TGGAGTTCAGACGTGTGCTCTTCCGATCTG<br>TTTTCTGTCCCTCCCTCAGTA   |
| 21            | ACACTCTTTCCCTACACGACGCTCTTCCGATCTN<br>NNNCAGAGAGAGCAGGACGTCACA    | TGGAGTTCAGACGTGTGCTCTTCCGATCTA<br>GCACTACCTACGTCAGCACCT   |

|                 |                                                                    |                                                              |
|-----------------|--------------------------------------------------------------------|--------------------------------------------------------------|
| 22              | ACACTCTTTCCCTACACGACGCTCTTCCGATCTN<br>NNNCACTGCTGAACCAGTCAAACCTC   | TGGAGTTCAGACGTGTGCTCTTCCGATCTG<br>GCATGGGGAAATATAAACTTG      |
| 23              | ACACTCTTTCCCTACACGACGCTCTTCCGATCTN<br>NNNGACAGAGGGGAGAGAAACAGAGC   | TGGAGTTCAGACGTGTGCTCTTCCGATCTT<br>TCTAGATGCCGACAAAAGGAT      |
| 24              | ACACTCTTTCCCTACACGACGCTCTTCCGATCTN<br>NNNGTAGAAATGGGGTCTTGCTTTG    | TGGAGTTCAGACGTGTGCTCTTCCGATCTT<br>TGAGTCTATCGAGTGTGTGCAT     |
| 25              | ACACTCTTTCCCTACACGACGCTCTTCCGATCTN<br>NNNTCACTTCAGCCCAGGAGTAT      | TGGAGTTCAGACGTGTGCTCTTCCGATCTT<br>GTGTATGGTGAGAGGTAGGGA      |
| 26              | ACACTCTTTCCCTACACGACGCTCTTCCGATCTN<br>NNNCTGACTCAGCCCTGCAAAGG      | TGGAGTTCAGACGTGTGCTCTTCCGATCTC<br>AAGTCAGGGGAGCGTGTC         |
| 27              | ACACTCTTTCCCTACACGACGCTCTTCCGATCTN<br>NNNACGTCTCATATGCCCCTTGG      | TGGAGTTCAGACGTGTGCTCTTCCGATCTA<br>CGTAGGAATTTTGGTGGGACA      |
| 28              | ACACTCTTTCCCTACACGACGCTCTTCCGATCTN<br>NNNTGCAGTCTCCTGCTTCTCTG      | TGGAGTTCAGACGTGTGCTCTTCCGATTGG<br>TGGAGTGCTCTGTGTTTG         |
| 29              | ACACTCTTTCCCTACACGACGCTCTTCCGATCTN<br>NNNCCCTGTTCTAAAGCCCACC       | TGGAGTTCAGACGTGTGCTCTTCCGATCTA<br>CTGGTTCTGTTTGTGGCCA        |
| 30              | ACACTCTTTCCCTACACGACGCTCTTCCGATCTN<br>NNNAGAGACTGATTGCGTGAGT       | TGGAGTTCAGACGTGTGCTCTTCCGATCTC<br>ACTCCAGCCTAGGCAACAA        |
| 31              | ACACTCTTTCCCTACACGACGCTCTTCCGATCTN<br>NNNCCAGCCCCTCTGTCAAACCT      | TGGAGTTCAGACGTGTGCTCTTCCGATCTT<br>GAATGGATTCTTGAAACAATGA     |
| 32              | ACACTCTTTCCCTACACGACGCTCTTCCGATCTN<br>NNNCGCGGGGCTGAAGTAGATCAA     | TGGAGTTCAGACGTGTGCTCTTCCGATCTC<br>CTGTCTCTGCTCCTTTGTCCCC     |
| Site 5,<br>OT1  | ACACTCTTTCCCTACACGACGCTCTTCCGATCTN<br>NNNATGGCTGCAAATCCAAGGGT      | TGGAGTTCAGACGTGTGCTCTTCCGATCTA<br>AATGCTTCTCGGGCTCTCC        |
| Site 5,<br>OT2  | ACACTCTTTCCCTACACGACGCTCTTCCGATCTN<br>NNNGAGGTTGAAACTCCTCGCCA      | TGGAGTTCAGACGTGTGCTCTTCCGATCTG<br>GAATTAAGATGCAACTGAGAGTA    |
| Site 5,<br>OT3  | ACACTCTTTCCCTACACGACGCTCTTCCGATCTN<br>NNNGGCTGTCCCTGGTTGTCTGG      | TGGAGTTCAGACGTGTGCTCTTCCGATCTC<br>GAGCACTGAGGCCTGGTTA        |
| EMX1            | ACACTCTTTCCCTACACGACGCTCTTCCGATCTN<br>NNNCAGCTCAGCCTGAGTGTTGA      | TGGAGTTCAGACGTGTGCTCTTCCGATCTC<br>TCGTGGGTTTGTGTTGC          |
| EMX1,<br>OT1    | ACACTCTTTCCCTACACGACGCTCTTCCGATCTN<br>NNNGTGGGGAGATTTGCATCTGTGGAGG | TGGAGTTCAGACGTGTGCTCTTCCGATCTG<br>CTTTTATACCATCTTGGGGTTACAG  |
| EMX1,<br>OT2    | ACACTCTTTCCCTACACGACGCTCTTCCGATCTN<br>NNNCAATGTGCTTCAACCCATCACGGC  | TGGAGTTCAGACGTGTGCTCTTCCGATCTC<br>CATGAATTTGTGATGGATGCAGTCTG |
| EMX1,<br>OT3    | ACACTCTTTCCCTACACGACGCTCTTCCGATCTN<br>NNNGAGAAGGAGGTGCAGGAGCTAGAC  | TGGAGTTCAGACGTGTGCTCTTCCGATCTC<br>ATCCCGACCTTCATCCCTCCTGG    |
| VEGFA3,<br>OT4  | ACACTCTTTCCCTACACGACGCTCTTCCGATCTN<br>NNNGCTCATTTCCTACGGCCAG       | TGGAGTTCAGACGTGTGCTCTTCCGATCTC<br>TGCAGTGAGGAGGTGGTTC        |
| VEGFA3,<br>OT6  | ACACTCTTTCCCTACACGACGCTCTTCCGATCTN<br>NNNGCCACAGGCACTAACTTCTTCA    | TGGAGTTCAGACGTGTGCTCTTCCGATCTG<br>ATGAAGCTGCCTTTCCTAAGC      |
| VEGFA3,<br>OT12 | ACACTCTTTCCCTACACGACGCTCTTCCGATCTN<br>NNNGCGCTTTCCTTTGCTAGAATC     | TGGAGTTCAGACGTGTGCTCTTCCGATCTC<br>TCAGCAATGCTTATATACTGGC     |
| R-loop 1        | ACACTCTTTCCCTACACGACGCTCTTCCGATCTN<br>NNNTGCAGTCTCCTGCTTCTCTG      | TGGAGTTCAGACGTGTGCTCTTCCGATTGG<br>TGGAGTGCTCTGTGTTTG         |

|                               |                                                                |                                                          |
|-------------------------------|----------------------------------------------------------------|----------------------------------------------------------|
| <b>R-loop 2</b>               | ACACTCTTTCCCTACACGACGCTCTTCCGATCTN<br>NNNGGACATTTCCACCGCAAATG  | TGGAGTTCAGACGTGTGCTCTTCCGATGCT<br>ACAGAAAGGTCAGCAGC      |
| <b>R-loop 3</b>               | ACACTCTTTCCCTACACGACGCTCTTCCGATCTN<br>NNNCTGCACCTAGCCTCCATGTC  | TGGAGTTCAGACGTGTGCTCTTCCGATCTG<br>CTGTGGCATCCAGAGACAT    |
| <b>R-loop 4</b>               | ACACTCTTTCCCTACACGACGCTCTTCCGATCTN<br>NNNGGAGGTGGAGAGAGGATGT   | TGGAGTTCAGACGTGTGCTCTTCCGATCTT<br>CCTGAGGTCTAGGAACCCG    |
| <b>R-loop 5</b>               | ACACTCTTTCCCTACACGACGCTCTTCCGATCTN<br>NNNATGTGGGCTGCCTAGAAAAGG | TGGAGTTCAGACGTGTGCTCTTCCGATCTC<br>CCAGCCAAACTTGTCAACC    |
| <b>-198 target</b>            | ACACTCTTTCCCTACACGACGCTCTTCCGATCTN<br>NNNTCTTAGACATAACACACCAGG | TGGAGTTCAGACGTGTGCTCTTCCGATCTG<br>TCTGCCAGTCCTCTTC       |
| <b>-175 target</b>            | ACACTCTTTCCCTACACGACGCTCTTCCGATCTN<br>NNNTCTTAGACATAACACACCAGG | TGGAGTTCAGACGTGTGCTCTTCCGATCTG<br>TCTGCCAGTCCTCTTC       |
| <b><i>BCL11A</i> enhancer</b> | ACACTCTTTCCCTACACGACGCTCTTCCGATCTN<br>NNNCCTGGCCTCACTGGATACTC  | TGGAGTTCAGACGTGTGCTCTTCCGATCTC<br>TGACAAAAGAAGTCCTGGTATC |

**Supplementary Table 5.** Amplicons for high-throughput sequencing analysis.

| <b>Site #</b> | <b>Amplicon</b>                                                                                                                                                                                                                                                                             |
|---------------|---------------------------------------------------------------------------------------------------------------------------------------------------------------------------------------------------------------------------------------------------------------------------------------------|
| <b>1</b>      | CCGACTGGTCCACTTACCTATCACAACTGCAATATTACATAAATAGTCTGTTAGAGAAGG<br>ACAACCTGAATCTGCAAATCAGTATCTTCTCAATGAGAGTACAAGGAGGCAATGGCTACATACGAT<br>GGACAAACCAGAAGCCGCTCCTGGGCTATGTTTACTATTTACTTTTTATGGTATAAAAATGTTCTCA<br>GTCAAGCAGTTTCAACAATAGATACCACAGTTCCAATAAAAAGAGGGCT                              |
| <b>2</b>      | GCAAGTCAGGGGAGCGTGTCCATAGGGTGCCAGGCTGGCCGCTTCTCCACGGGCCCTGCCTTC<br>CTCACCTGATGATCTTGAGGCTGTTGTCATACTTCTCATGGTTCACACCCATGACGAACATGGGG<br>GCATCAGCAGAGGGGGCAGAGATGATGACCCTTTGGCTCCCCCTGCAAATGAGCCTACAGCA<br>GAGAAGCAGACAGTTATGAACCCGGGTCCTGCCTTTCAGGGCTGAGTCAG                                |
| <b>3</b>      | TAACAAGACCTGGCTGAGCTAACTGTGACAGCATGTGGTAATTTTCCAGCCCGCTGGCCCTGTA<br>AAGGAACTGGAACACAAAGCATAGACTGCGGGGCGGGCCAGCCTGAATAGCTGCAAACAAGT<br>GCAGAATATCTGATGATGTCATACGCAC                                                                                                                          |
| <b>4</b>      | AAGTGAAGACCAAGGATAGACTGCTGGGCTTGACAGCATGGAGGGTGTGGGGGCCTAGGCAA<br>GTGCAATATTCATGTGGTGTGATTGGGCCAAAGGTGTCATTGGAGAGTACTCAAAAAACTAGG<br>AGAGGAGCTGAGCTTGTGAGGCGTGTAGGAAGATGGAGGAGAAGAAAAGGGGGAGTGGTGGT<br>GGCT                                                                                 |
| <b>5</b>      | GTGGAGTTTAGCCAGGGACCGTTTTAGACAGATATTTGCATTGAGATAGTGTGGGGAAGGGGCC<br>CCCAAGAGGATACTGCTGCTTAATTTTTTTATAGCCTTGCCTTGTCCGATTGAGTATTCCAA<br>TTTTTCTCTAATTTATTCTTCCCTTAGCTAGTTTTCTTCTCCACCA                                                                                                        |
| <b>6</b>      | GTGCAGACGGCAGTCACTAGGGGGCGCTCGGCCACCACAGGGAAGCTGGGTGAATGGAGCGA<br>GCAGCGTCTTCGAGAGTGAGGACGTGTGTGTCTGTGTGGGTGAGTGTGTGCGTGTGGGG<br>TTGAGGGCGTTGGAGCGGGGAGAAGGCCAGGGGTCACTCCAGGATTCCAATAG                                                                                                      |
| <b>7</b>      | CCAACATACAGAAGTCAGGAATGCTTGAATATAAATTTATTACTCTATGTTCTATTTAAGTTTT<br>CATGTTCTAAAAATGTATCCAGTTTACACGTCTCATATGCCCTTGGCAGTCATCTTAGTCATTA<br>CCTGAGGTGTTGTTGTAACCTCATATAAACTGAGTTCCCATGTTTTGCTTAATGGTTGAGTTCCT<br>T                                                                              |
| <b>8</b>      | TGGTGGAGTGCTCTGTGTTTGTCTTTATAAACCAGATGAGAGGATGAAGGCAACAAGCTTCTGT<br>ACCAACATACATGCCCTTTGCCTCAAGTCTGGTTATTTTAGGGGGATGCTAGGTTGCTTTGGGT<br>CTACCTTACTGAGAAAATGGCCCCAGGTCATTGTCATGTCCAGTTGTGGTAGACAGCATGTGTCC<br>TAAAGGTATATTCACATGCATGTGCAAAAATACAGGGGTCCTTCTAACCTATCACAGAGAAGC<br>AGGAGACTGCA |

|    |                                                                                                                                                                                                                                                                                                                            |
|----|----------------------------------------------------------------------------------------------------------------------------------------------------------------------------------------------------------------------------------------------------------------------------------------------------------------------------|
| 9  | GCTACAGAAAGGTCAGCAGCTATATTTAACCTCAGACCAGGGTGCCGGTGGGAGATCTGGTTTTCC<br>GGAAGACGGAATGGGGAGAAGGGCAGGTTCCCGGAGGCGCCAGACACCCAATCCTCCCGGT<br>GACATTTACAGCCTGGCCTTTGGGGTCGGGTCAACGCTAGGCTGGCAGGGGAAGGGCGGGGC<br>CGTGAGGTGAGCCGGCGCTGCAGGAAGGGGCCACCACCAGAGGGGCCATTTTTCGGGTGAAA<br>TGTCC                                           |
| 10 | AACAAATGTGAAAAAACAAGTATCAAAATGTTCTCACTCACATGTGGAACTAAAAAGTGGATC<br>TCATGAAGATAGAGAATAGACTGCTGGTTACTAGAGGTGAGGAAGAGTAGAGGGGTGGGGGAG<br>AGAAAGAGAAGTTGATTGATGGGTACAAACATACAGTTTAATAGAAGAAGTATGACCCAGTGT<br>GATAGATCAGTAGGGTGACTACAGTTTACAACCATGTA                                                                            |
| 11 | AAGTGTTTCAGCTGCTTTTCTTTTCAATTTATTCCACATATAATTACTATAATTGCTAAACATTTATTTAG<br>TGTCAGGTAATGTGCTAAACAGAGAGTTACTGCTCAGACATGTAATAATAATAAACACATCAA<br>ATAACCATACCATTTTAAGCTGTAGTATTATGAAGGGAAATCTGGAGCAAAGAGAATAGACTGTA<br>GGAAACCAGTTAAGAAATAGGACATGGAGGCTAGGTGCAG                                                                |
| 12 | ATTGACATTCCTAACTTCAACGTACCGAGTAAGGAAATTCCTTGTCTGAGATCACAGACAAATG<br>GGATTGTATGCATTAAGTAAAATGGTCAAGGAGTCAGTACTGAAGATCAGCAATGCCAAGGGTA<br>AACGGAATATCCCAGTATAATAGGATAAGCAATGGACAACCTATTTTGGAGCACTGAATC                                                                                                                       |
| 13 | ATGTGGGCTGCCTAGAAAGGCATGGATGAGAGAAGCCTGGAGACAGGGATCCCAGGGAAACGC<br>CCATGCAATTAGTCTATTTCTGCTGCAAGTAAGCATGCATTTGTAGGCTTGATGCTTTTTTTCTGC<br>TTCTCCAGCCCTGGCCTGGGTCAATCCTTGGGGCCAGACTGAGCACGTGATGGCAGAGGAAA<br>GGAAGCCCTGCTTCTCCAGAGGGCGTCGCAGGACAGCTTTTCTAGACAGGGGCTAGTATGT<br>GCAGCTCCTGCACCGGGATACTGGTTGACAAGTTTGGCTGGG     |
| 14 | ATGTGGGCTGCCTAGAAAGGCATGGATGAGAGAAGCCTGGAGACAGGGATCCCAGGGAAACGC<br>CCATGCAATTAGTCTATTTCTGCTGCAAGTAAGCATGCATTTGTAGGCTTGATGCTTTTTTTCTGC<br>TTCTCCAGCCCTGGCCTGGGTCAATCCTTGGGGCCAGACTGAGCACGTGATGGCAGAGGAAA<br>GGAAGCCCTGCTTCTCCAGAGGGCGTCGCAGGACAGCTTTTCTAGACAGGGGCTAGTATGT<br>GCAGCTCCTGCACCGGGATACTGGTTGACAAGTTTGGCTGGG     |
| 15 | GTGCGTATGACATCATCAGATATTCTGCACTTGTTCAGCTATTGAGGCTGGCCCGCCCGCA<br>GTCTATGCTTTGTGTTCCAGTTTCCTTTACAGGGCCAGCGGGCTGGAAAATTACCACATGCTGTC<br>ACAGTTAGCTCAGCCAGGTCTTGTTA                                                                                                                                                           |
| 16 | AAAAGGGCAAGCTTCAGATTGTTTAGATTTTGTGTTGTGAAATACTTCTCATTCTCATTATTA<br>TATAAATGAGTTTCTATTAATTTTCTTAGTTTCTTTATAGATACTGATATAATTCATAATAATACC<br>ATTCTTATCTTAAACCTTGTACACACAATGAACTTTGCTGTTCACTGTCAGTTATACTTACAT<br>GAGGTGACCCATTTCCATTCAAGGTTTTAGAAGCACATCAAGGACATTCTAAGGATGATTGACT<br>TACACAATGATCTCTGAACATGCCTCCTGCCTTCTCCTCACT |
| 17 | TGTTCTGCCCTCACAGAGGTTATGATCCAATGAGACAGATGAGGTGGTTGTGGATTAATTAATA<br>TTCATAAAAAAGCAAATTAAGTGCTATAATGTTAGAATTACAGAAAAATAAAGGATGTAATTTGGG<br>ACTTTAATTTTTAAATACTTATATTCACTTTTATAACGAAGAACTCTTTGTGGAAAATGGTAATTT<br>CTGTTACCATTTGGGATAAGCACAGTTTTAAATAGTTCTGGAATTATAGAGGCACCTCCCCGTATG<br>TCCTTTGGG                            |
| 18 | GTGCGTGCTTCTTACATGCCTTATTAACCCGGTGTGTTTAAACCAAACACTGTTTCATATTTTTCCA<br>GGAGGAAAACAACAATAAAAAACATTATTCAGATAAAATATTATAGGTTTATTTAAAACCTTAATT<br>CTCACCTTGAGTATGCAAAATACAACTCCACAAAATGTTTCATTTTACTTTGTAGTTTACAAATATA<br>CAAAATAGACGTTTGCTTAAATTTATATTACATATTTATTAAGGCAAGGAACTATATAGAAAAACAC<br>ATTTGTTCTGCTTAAGGCATACTTGG      |
| 19 | GCTTTAAACATTTGTCTGTGCGTCAATGCTTTAAGGGACATACTATGTGGTGATTTCATTTTCAA<br>GTAAGAATTTGCAGAAAATGAGAAAACAACTTTCTGAACAATACAATTTTAAATGCATACTAAGGCT<br>GGTTAACTGGTTAGAATACTAGGTTAAACAAGGCCAACTCCAGATAGGCCAACAGCTTTTCAAAC<br>CAATATTCCTGACACTGCCAGGAATAAAGAAAACCTTCTCACTACTGAGGGAGGGACAGAAAAC                                          |
| 20 | AGCACTACCTACGTACGCACCTGGGACCCCGCCACCGTGCGCCGGGCCTTGCAGTGGGCGCG<br>CTACCTGCGCCACATCCATCGGCGCTTTGGTCCGCATGGCCCCATTGCGACGGCTCTGGAGCG<br>GCGGCTGCACAACCAGTGGAGGCAAGAGGGCGGCTTTGGGCGGGGTCCAGTTCGGGATTAG<br>CGAACTTCAGGCCCTCGGTCACTGTGACGTCTGCTCTCTG                                                                             |
| 21 | CACTGCTGAACCAGTCAAACCTCAAACCTAAGCATGGAGTTTCTAAGAGATGGAAGAAAAGCTA<br>TTATATATACATAAGAGAGAAGGTTTACTGCCATAAAAAATATCTAATTTATGACAATAAAAACT<br>TACTTTATTTGGATTTGATCCAGTAACACCAATAGGGTTCAGCAAATCTTCTAATCCATGAGGTAC<br>TGGCCAAAGATTCAAAGCCATTTTTCCAGATACTAGAGTGTCTGTGTAATCAAACAAGTTTATATT<br>TCCCCATGCC                            |

|                |                                                                                                                                                                                                                                                                                                    |
|----------------|----------------------------------------------------------------------------------------------------------------------------------------------------------------------------------------------------------------------------------------------------------------------------------------------------|
| 22             | TTCTAGATGCCGACAAAAGGATCAAGGTGGCGAAGCCCCTGGTGGAGATGGATGGTGGATGAGAT<br>GACCCGTATTATCTGGCAGTTCATCAAGGAGAAGGTAGTGCCCCCTCCTGAAGTGGGTGGCTCT<br>CCAGGTGGGCTGGCCAGGGATTGTTCTGTCCACAGGGTCTTCTGGACTGCAGGTCCCTAGGA<br>CCCCCCCCTTGTCTGGTAGGCAGCAGCAGCTCTGTTTCTCTCCCTCTGTC                                      |
| 23             | GTAGAAATGGGGTCTTGCTTTGTTGCCAGGCTGGTCTAAAAAATATACTACTTTTATGGATCAT<br>ACTGCTAAACACTAATAAACCTTTGGAAATATAAATCTATACTTCTTACCTGGGATTGGAACA<br>AGGTACTCTTTGAGTGTTCACATTGTCACATAAGGGTTCTCCTCCATGGTAGATACCTGTTTCAA<br>CATAGATCTAAAAGAAAAAGTAGGTATATACTAATGTATACACTCAACATACACATATGCACACA<br>CTCGATAGACTCAA    |
| 24             | GTGCGTATGACATCATCAGATATTCTGCACTTGTGGCAGCTATTCAGGCTGGCCCCGCCCCGCA<br>GTCTATGCTTTGTGTTCCAGTTTCCTTTACAGGGCCAGCGGGCTGGAAAATTACCACATGCTGTC<br>ACAGTTAGCTCAGCCAGGTCTTGTTA                                                                                                                                |
| 25             | AACAAATGTGAAAAAAAACAAGTATCAAATGTTCTCACTCACATGTGGAACTAAAAAGTGGATC<br>TCATGAAGATAGAGAATAGACTGCTGGTTACTAGAGGTCAGGAAGAGTAGAGGGGTGGGGGAG<br>AGAAAGAGAAGTTGATTGATGGGTACAAACATACAGTTTAATAGAAGAAGTATGACCCAGTGTTT<br>GATAGATCAGTAGGGTACTACAGTTTACAACCATGTA                                                  |
| 26             | CTGACTCAGCCCTGCAAAGGCAGGACCCGGGTTTATACTGTCTGCTTCTCTGCTGTAGGCTCA<br>TTTGCAGGGGGGAGCCAAAAGGGTATCATCTCTGCCCCCTCTGCTGATGCCCCCATGTTCTGTC<br>ATGGGTGTGAACCATGAGAAGTATGACAACAGCCTCAAGATCATCAGGTGAGGAAGGCAGGGCC<br>CGTGGAGAAGCGGCCAGCCTGGCACCCCTATGGACACGCTCCCCTGACTTGC                                    |
| 27             | ACGTCTCATATGCCCTTGGCAGTCATCTTAGTCATTACCTGAGGTGTTCTGTTGTAACCTCATATAA<br>ACTGAGTTCCCATGTTTTGCTTAATGGTTGAGTTCCGTTTGTCTGCACAGCCTGAGACATTGCTG<br>GAAATAAAGAAGAGAGAAAAACAATTTTAGTATTTGGAAGGGAAGTGCTATGGTCTGAATGTATG<br>TGTCACCA                                                                          |
| 28             | TGGTGGAGTGCTCTGTGTTTGTCTTTATAAACCAGATGAGAGGATGAAGGCAACAAGCTTCTGT<br>ACCAACATACATGCCCTTTGCCTCAAGTCTGGTTATTTTAGGGGGATGCTAGGTTGCTTTGGGT<br>CTACCTTACTGAGAAAATGGCCCCAGGTCATTGTCATGTCCAGTTGTGGTAGACAGCATGTGTCC<br>TAAAGGTATATTACATGCATGTGCAAAAATACAGGGGTCTTCTAACCCCTATCACAGAGAAGC<br>AGGAGACTGCA        |
| 29             | AGAATTGCTGTCACTACTAACCAGCTATTTTCATAGCTGTTGCATGAGGAAAGGGACTAGAGTAGG<br>ATTGTACCCCTCAGTCTATGCTTTGTTTACTCTGAGTGTACAAAAGAT                                                                                                                                                                             |
| 30             | TCATGGAGTATGAGGCATAGACTGCAGGAGACATCAAACCATGACTTGCAGATGAAGAAGCATT<br>TAAAAGTTAGACACGCACAGCATTTCAGGAAGTTATATATAAGGAGTGTATAGAAGATAACACCT<br>CTAAAATGTGTAGTATATATATCAGGGGTTTTTTTTGAGACAGAGTTTTGCTC                                                                                                     |
| 31             | TGAATGGATTCTTGGAAACAATGATAACAAGACCTGGCTGAGCTAACTGTGACAGCATGTGGTA<br>ATTTTCCAGCCGCTGGCCCTGTAAAGGAACTGGAACACAAAGCATAGACTGCGGGGCGGGC<br>CAGCCTGAATAGCTGCAAACAAGTGCAGAATATCTGATGATGTCATACGCACAGTTTACAGATG<br>GGGCTGG                                                                                   |
| 32             | AGTCCCAGGGAGCTCAAGCCTGATTCCAAGGAGATTGCCAATATTTTAGGAGGGAGTAAACATT<br>TTCTGAAGTTTTTTGTTGTCTAAAGCCAAAAATGCACTTGCGCCTCCTGAGAGGACAAAGAGGA<br>AGAGAGACGGGGAGA                                                                                                                                            |
| Site 5,<br>OT1 | ATGGCTGCAATCCAAGGGTGCACACTGGGGTGTCTTGGCCTGAGTGCCAGCCTGCAGAGAG<br>CAGGAGTGGGCCACTTGGGGACCCCATCCACCAGGAAGCCTGAGAAAGCCAGGGTGAACC<br>CGGCCCTGTGGAATTCTGGAGAGCCCCGAGAAGCATT                                                                                                                             |
| Site 5,<br>OT2 | GAGGTTGAACTCCTCGCCACAGTCCACTCTCCATCTCCATCCCTACCCCATCAATAAGCCCTTC<br>CCCCACCATCTCAAGACACTGGAATGCAGGTAGGGAGAGGCCCCAGAGGGAGTATTTGAGAAT<br>TTGCTCCCCTGTCCCTTGCCTCAACTACTCTCAGTTGCATCTTAATTCC                                                                                                           |
| Site 5,<br>OT3 | GGCTGTCCCTGGTTGTCTGGTACCTGGCTTTGGAGCAATGAGGGCTGGTGGGGAGCGGCCCC<br>CAGTGGGGCCGTGATTAGCCAGGGCTGCCGTGTGGACCAATCAGCTGCTCAGGAAGGGGC<br>CGCCCCCTAACCAAGCCTCAGTGCTCG                                                                                                                                      |
| EMX1           | CAGCTCAGCCTGAGTGTTGAGGCCCAAGTGGCTGCTCTGGGGGCTCCTGAGTTTCTCATCTGT<br>GCCCTCCCTCCCTGGCCCAGGTGAAGGTGTGGTTCCAGAACCAGGAGACAAAGTACAAACGG<br>CAGAAGCTGGAGGAGGAAGGGCCTGAGTCCGAGCAGAAGAAGAAGGGCTCCCATCACATCAAC<br>CGGTGGCGCATTGCCACGAAGCAGGCCAATGGGGAGGACATCGATGTCACCTCCAATGACTAG<br>GGTGGGCAACCACAAACCACGAG |

|                         |                                                                                                                                                                                                                                                                                                                                 |
|-------------------------|---------------------------------------------------------------------------------------------------------------------------------------------------------------------------------------------------------------------------------------------------------------------------------------------------------------------------------|
| <b>EMX1,<br/>OT1</b>    | GTGGGGAGATTTGCATCTGTGGAGGCAATAAAGTGAAATAAATAACAGATGCAAGCAAGCTTTTC<br>CTGACGCCCCGCTTGTCCATGTCTAGGAAAGATTAACAGAGAGTCTGACACCTTTTAAAGATCTGA<br>CAGAGAAACATTTACCATAGACTATCACCTATTTTTCTGAGGGCTGCTACCTGTACATCTGCACA<br>AGATTGCCTTTACTCCATGCCTTTCTTCTTCTGCTCTAACTCTGACAATCTGTCTTGCCATGCCAT<br>AAGCCCCTATTCTTTCTGTAACCCCAAGATGGTATAAAAGC |
| <b>EMX1,<br/>OT2</b>    | CAATGTGCTTCAACCCATCACGGCCTTTGCAAATAGAGCCCTTTATTCATAGTAGACAAGAGTCT<br>AAGCAGAAGAAGAAGAGAGCCACTACCCAACCATCTACTCTTCTAATGGTGTTCCTACAAAGG<br>CCAAGTCATGAGACTGCATCCTTGTGAAAGCCAACACTGATGATAATGAGGCTTACCTTGAGTAC<br>AATGAAGTAGAGGAAGGTAGGCAGTGAAACAGTAGAAAAAAGTCCCCCCCCAAAAGGCAGACT<br>GCATCCATCACAAATTCATGG                           |
| <b>EMX1,<br/>OT3</b>    | GAGAAGGAGGTGCAGGAGCTAGACTCCGAGGGGAGGCTGCGAGCCGCAAGCGCAGGAGCCGG<br>GTGGGAGAGAGACCCCTTCTTCTGCAAATGAGGAGGCCGAGCAGAAGAAAGACGGCGACAGAT<br>GTTGGGGGGAGGGGACGGTTTGTGAGGGATAGGGAGAGAAAAGTCTAAGTGAGAGCAGGACGA<br>GGAGGGGAGGGTGGTTGGGAAGGGGATGAAATAAAGTGGCTGAGGGAAGGCTGAGGTGGGG<br>TGAAGCTCCGCCAGGAGGTGAAGGTCGGGATG                       |
| <b>VEGFA3,<br/>OT4</b>  | GCTCATTTCTACGGCCAGGGAGCGGCCACTGCAGCGGGCGGGGAGGGGAAGGGGTGAA<br>GGGGAGGGGAAGTCACCGACAACAACAGCCGAGTCCCCCCACACACACTCACTCACTC<br>ACTCACTCGCTCTCTCACTCACACACACACAACACGGGCAAGAACCACCTCCTCACTGCAG                                                                                                                                       |
| <b>VEGFA3,<br/>OT6</b>  | GCCACAGGCACTAACTTCTTACGCCTATCTCCTATCTGCTCTTCCCTCCCACCCCTCCACACAC<br>ACACACTTACTCACACGCTCACAAACACATGCCAACCTAATTCAGGGACTCACATACAGCTTAG<br>GAAAGGCAGCTTCATC                                                                                                                                                                        |
| <b>VEGFA3,<br/>OT12</b> | GCGCTTTCCCTTTGCTAGAATCTAATTTTATGAAACACACTCATGTGTGTGCCACATGCACACAC<br>ACACTACCAAGAGACACACATATACCAAAGCAACCACTGAACCCTCTCAAGAAGAAAAATTGAA<br>GGCTGGAATTTTCTCTATATAATGAAGTTTTTTTAAATGTTGCCAGTAATATAAGCATTGCTGAG                                                                                                                      |
| <b>R-loop 1</b>         | TGGTGGAGTGCTCTGTGTTTGTCTTTATAAACCAGATGAGAGGATGAAGGCAACAAGCTTCTGT<br>ACCAACATACATGCCCTTTGCCTCAAGTCTGGTTATTTTAGGGGGATGCTAGGTTGCTTTGGGT<br>CTACCTTACTGAGAAAATGGCCCCAGGTCATTGTCATGTCCAGTTGTGGTAGACAGCATGTGTCC<br>TAAAGGGTATATTACATGCATGTGCAAAAATACAGGGGTCTTCTAACCTATCACAGAGAAGC<br>AGGAGACTGC                                       |
| <b>R-loop 2</b>         | GCTACAGAAAGGTCAGCAGCTATATTTAACCTCAGACCAGGGTGCGGTGGGAGATCTGTTTTCC<br>GGAAGACGGAATGGGGAGAAGGGCAGGTTCCCCGAGGCGCCAGACACCCAATCCTCCCGGT<br>GACATTTACAGCCTGGCCTTTGGGGTCGGGTCAACGCTAGGCTGGCAGGGGAAGGGCGGGGC<br>CGTGAGGTGAGCCGGCGCTGCAGGAAGGGGCCACCACCAGAGGGGCCATTTTTCGGGTGAAA<br>TGTC                                                   |
| <b>R-loop-3</b>         | GCTGTGGCATCCAGAGACATGTTTTCTTATCTCCTTAAGTGTTTCAGCTGCTTTTCTTTTCAATTTATT<br>CCACATATAAATAACTATAAATTGCTAAACATTTATTTAGTGTGCTAAACAGAGAGTTA<br>CTGCTCAGACATGTAATAATAAATAACACATCAAATAACCATAACATTTTAAAGCTGTAGTATTA<br>TGAAGGGAAATCTGGAGCAAAGAGAATAGACTGTAGGGAAACCAGTTAAGAAATAGGACATGGA<br>GGCTAGGTGCAG                                   |
| <b>R-loop-4</b>         | GGAGGTGGAGAGAGGATGTTTTGCTTATCCAGAAAAGGGAGTGATTGCTTCCAGGGGCCTCAGG<br>GGAATAAATCATAGAATCCTGGACAAGGTTTGAAGGACAGGTAGGATTTGGGTGGGTGGAGGAG<br>GGTGCATGGGGTCAGAATTGTAACCGAAAACCTATTCCAGGTGGATAGAGAAAATTTCTAGTGTT<br>GTTGTTTTTAAACTATTTGGGGGACTGGCACAGACCCTTTTTGAATACCTGATGGGCTCACATTTCT<br>TGTCGAATCCCAGCGGGTTCTAGACCTCAGGA            |
| <b>R-loop-5</b>         | ATGTGGGCTGCCTAGAAAAGGCATGGATGAGAGAAGCCTGGAGACAGGGATCCCAGGGAAACGC<br>CCATGCAATTAGTCTATTTCTGCTGCAAGTAAGCATGCATTTGTAGGCTTGATGCTTTTTTTCTGC<br>TTCTCCAGCCCTGGCCTGGGTCAATCCTTGGGGCCAGACTGAGCACGTGATGGCAGAGGAAA<br>GGAAGCCCTGCTTCTCCAGAGGGCGTGCAGGACAGCTTTTCTAGACAGGGGCTAGTATGT<br>GCAGCTCCTGCACCGGGATACTGGTTGACAAGTTTGGCTGGG          |
| <b>-198<br/>target</b>  | CTGACAAAAGAAGTCCTGGTATCTTCTATGGTGGGAGAAGAAAAGTCTAAAGGGAAGAATAAA<br>TTAGAGAAAAATTGGAATGACTGAATCGGAACAAGGCAAAGGCTATAAAAAAATTAAGCAGCAG<br>TATCCTCTTGGGGGCCCTTCCCACACTATCTCAATGCAAATATCTGTCTGAAACGGTCCCTGG<br>CTAAACTCCACCCATGGGTTGGCCAGCCTTGCCTTGACCAATAGCCTTGACAAGGCAAACCTTGA<br>CCAATAGTCTTAGAGTATCCAGTGAGGCCAGG                 |

|                            |                                                                                                                                                                                                                                                                                                                    |
|----------------------------|--------------------------------------------------------------------------------------------------------------------------------------------------------------------------------------------------------------------------------------------------------------------------------------------------------------------|
| <b>-175<br/>target</b>     | CTGACAAAAGAAGTCCTGGTATCTTCTATGGTGGGAGAAGAAAAGCTAGCTAAAGGGAAGAATAAA<br>TTAGAGAAAAATTGGAATGACTGAATCGGAACAAGGCAAAGGCTATAAAAAAATTAAGCAGCAG<br>TATCCTCTTGGGGGCCCTTCCCCACACTATCTCAATGCAAATATCTGTCTGAAACGGTCCCTGG<br>CTAAACTCCACCCATGGGTTGGCCAGCCTTGCCCTTGACCAATAGCCTTGACAAGGCAAAGTGA<br>CCAATAGTCTTAGAGTATCCAGTGAGGCCAGG |
| <b>BCL11A<br/>enhancer</b> | TCTTAGACATAACACACCAGGGTCAATACAACCTTGAAGCTAGTCTAGTGCAAGCTAACAGTTGC<br>TTTTATCACAGGCTCCAGGAAGGGTTTGGCCTCTGATTAGGGTGGGGGCGTGGGTGGGGTAGA<br>AGAGGACTGGCAGAC                                                                                                                                                            |

## Supplementary Note 1. Python script to extract allele frequencies with two edits.

```
#!/usr/bin/env python
# coding: utf-8

# In[1]:

#import python packages
import pandas as pd
import matplotlib.pyplot as plt
import numpy as np

# In[2]:

#import data

#names is a tab-delimited file containing the CRISPResso2.0 allele frequency table
filenames.
#here, names.txt contains 18 filenames, sorted by site, editor, and biological replicate.
names = "names.txt"
df = pd.read_table(names,delim_whitespace=True)
df.set_index('file',inplace=True)

#group the files according to their corresponding genomic locus.
files_site5 = list(df.index.values)[0:6] #six files: three for three ABE7.10 replicates; three for
three ABE8e replicates.
files_site6 = list(df.index.values)[6:12]
files_site7 = list(df.index.values)[12:18]

# In[3]:

def get_data(site,D):
    """Function inputs: site number (here: 5,6, or 7), and allele frequencies table (D).

    Function output: the percent of total alleles in which both of the adenine (A) substrates
    are converted to the desired guanine (G) products.

    Gu and Gd correspond to a G product at the upstream and downstream target positions,
    respectively.
    """

    if site == 5:
        total_reads = D[D["Aligned_Sequence"].str.contains('.....',
regex=True)]["#Reads"].sum()
```



```

#Gu = G at upstream position; Gd = G at downstream position
Gu_Gd = D[D["Aligned_Sequence"].str.contains('.....GG.....',
regex=True)][ "#Reads"].sum()
percent_Gu_Gd = 100*Gu_Gd/total_reads
data = {'% of total reads with both substrates edited': percent_Gu_Gd}

if site == 6:
    total_reads = D[D["Aligned_Sequence"].str.contains('.....',
regex=True)][ "#Reads"].sum()
    Gu_Gd = D[D["Aligned_Sequence"].str.contains('.....G...G.....',
regex=True)][ "#Reads"].sum()
    percent_Gu_Gd = 100*Gu_Gd/total_reads
    data = {'% of total reads with both substrates edited': percent_Gu_Gd}

if site == 7:
    total_reads = D[D["Aligned_Sequence"].str.contains('.....',
regex=True)][ "#Reads"].sum()
    Gu_Gd = D[D["Aligned_Sequence"].str.contains('.....G....G.....',
regex=True)][ "#Reads"].sum()
    percent_Gu_Gd = 100*Gu_Gd/total_reads
    data = {'% of total reads with both substrates edited': percent_Gu_Gd}

return data

```

# ln[4]:

```
def makedfs(site,names):
```

```
    """Function inputs: Site number (here: 5,6, or 7) and the names.txt file.
```

```
    Please note: ABE7.10 is henceforth referred to as ABE7 in the code.
```

```
    Function output: Two tables, one for ABE7 and one for ABE8e, that contain the get_data
function output for
```

```
    each of the three biological replicates at the designated site.
```

```
    """
```

```
    #i, below, is initialized and subsequently used to track iterations of the for loop
    #and to appropriately assign the allele frequency table to the corresponding editor
    (ABE7.10 or ABE8e)
```

```
    i = 0
```

```
    global df_ABE7
```

```
    global df_ABE8e
```

```
    for file in names:
```

```
        D = pd.read_table(file,delim_whitespace=True)
```

```
        #the output after the first three iterations (0<=i<=2) is the ABE7.10 dataframe
```

```
        if i == 0:
```

```

df_ABE7 = pd.DataFrame(get_data(site,D),index=[str(file)])
if 1 <= i <= 2:
    D_output_new = pd.DataFrame(get_data(site,D),index=[str(file)])
    df_ABE7 = pd.concat([df_ABE7, D_output_new], axis =0)
#the output after the final three iterations (3<=i<=5) is the ABE8e dataframe
if i == 3:
    df_ABE8e= pd.DataFrame(get_data(site,D),index=[str(file)])
if 4<=i<=5:
    D_output_new = pd.DataFrame(get_data(site,D),index=[str(file)])
    df_ABE8e= pd.concat([df_ABE8e, D_output_new], axis =0)
i+=1 #tracking iteration
return df_ABE7,df_ABE8e

```

# In[5]:

```

#create dataframes
ABE7Site5,ABE8eSite5 = makedfs(5,files_site5)
ABE7Site6,ABE8eSite6 = makedfs(6,files_site6)
ABE7Site7,ABE8eSite7 = makedfs(7,files_site7)

```

# In[6]:

```

#for the given editor and site, obtain the average, across three biological replicates,
#percent of total alleles in which both substrate bases are converted.
ABE7_Site5_GuGd_average = float(ABE7Site5.mean())
ABE8e_Site5_GuGd_average = float(ABE8eSite5.mean())

ABE7_Site6_GuGd_average = float(ABE7Site6.mean())
ABE8e_Site6_GuGd_average = float(ABE8eSite6.mean())

ABE7_Site7_GuGd_average = float(ABE7Site7.mean())
ABE8e_Site7_GuGd_average = float(ABE8eSite7.mean())

#store averages by editor for subsequent plotting
means_ABE7 =
(ABE7_Site5_GuGd_average,ABE7_Site6_GuGd_average,ABE7_Site7_GuGd_average)
means_ABE8e =
(ABE8e_Site5_GuGd_average,ABE8e_Site6_GuGd_average,ABE8e_Site7_GuGd_average)

#for the given editor and site, obtain the standard deviation, across three
#biological replicates, in the percent of total alleles in which both substrate bases are
converted.

ABE7_Site5_GuGd_std = float(ABE7Site5.std())
ABE8e_Site5_GuGd_std = float(ABE8eSite5.std())

```

```

ABE7_Site6_GuGd_std = float(ABE7Site6.std())
ABE8e_Site6_GuGd_std = float(ABE8eSite6.std())

ABE7_Site7_GuGd_std = float(ABE7Site7.std())
ABE8e_Site7_GuGd_std = float(ABE8eSite7.std())

#store standard deviations by editor for subsequent plotting
std_ABE7 = (ABE7_Site5_GuGd_std,ABE7_Site6_GuGd_std,ABE7_Site7_GuGd_std)
std_ABE8e = (ABE8e_Site5_GuGd_std,ABE8e_Site6_GuGd_std,ABE8e_Site7_GuGd_std)

# In[7]:

#number of sites
n_sites = 3

#create plot
fig, ax = plt.subplots()
index = np.arange(n_sites)
bar_width = 0.35
opacity = 1

#plot data
ABE7bars = plt.bar(index, means_ABE7,
bar_width,alpha=opacity,color='#A0A0A3',label='ABE7.10',yerr=std_ABE7,capsize=5)
ABE8ebars = plt.bar(index + bar_width, means_ABE8e, bar_width,
alpha=opacity,color='#F94040',label='ABE8e',yerr=std_ABE8e,capsize=5)

#label plot
plt.ylabel('Percent of total alleles in which both \n substrate bases are converted')
plt.xticks(index + bar_width/2, ('Site 5', 'Site 6', 'Site 7'))

#display plot with legend
plt.legend()
plt.tight_layout()
plt.show()

# In[ ]:

```

**Supplementary Sequences 1.** Amino acid sequences for each base editor in this study.

**ABE8e**

MKRTADGSEFESP KKKR KVSEVEFSHEYW MRHALTLAKRARDEREVPVGAVLV LNNRVIGE  
GWNRAIGLHDPTAHAEIMALRQGGLVMQNYRLIDATLYVTFEPCVMCAGAMIHSRIGRVVFG  
VRNSKRGAAGSLMNVLNYPGMNHRVEITEGILADECAALLCDFYRMPRQVFNAQKKAQSSI  
NSGGSSGGSSGSETPGTSESATPESSGGSSGGSDKKYSIGLAIGTNSVGWAVITDEYKVPS  
KKFKVLGNTDRHSIKKNLIGALLFDSGETAEATRLKRTARRRYTRRKNRICYLQEIFS NEMAK  
VDDSSFFHRLEESFLVEEDKKHERHPIFGNIVDEVAYHEKYPTIYHLRKKLVDSTDKADLR LIYL  
ALAHMIKFRGHFLIEGDLNPDNSDVKLFIQLVQTYNQLFEENPINASGVDAKAILSARLSKSR  
RLENLIAQLPGEKKNGLFGNLIASLGLTPNFKSNFDLAEDAQLQLSKDTYDDDLNLLAQIG  
DQYADLFLAAKNLSDAILLSDILRVNTEITKAPLSASMIKRYDEHHQDLTLLKALVRQQLPEKY  
KEIFFDQSKNGYAGYIDGGASQEEFYKFIKPILEKMDGTEELLVKLNREDLLRKQRTFDNGSI  
PHQIHLGELHAILRRQEDFYFPLKDNREKIEKILTRIPYVVGPLARGNSRFAWMTRKSEETIT  
PWNFEVVDK GASAQSFIERMTNFDKNLPNEKVLPKHSLLYEYFTVYNELTKVKYVTEGMR  
KPAFLSGEQKKAIVDLLFKTNRKVTVKQLKEDYFKKIECFDSVEISGVEDR FNASLGTYHDLL  
KIIKDKDFLDNEENEDILEDIVLTLTFEDREMIEERLKYAHLFDDKVMKQLKRRRYTGWGRL  
SRKLINGIRDKQSGKTILDFLKSDGFANRFMQLIHDDSLTFKEDIQKAQVSGQGD SLHEHIA  
NLAGSPAIKKGILQTVKVVDELVKVMGRHKPENIVIEMARENQTTQKGQKNSRERMKRIEEGI  
KELGSQILKEHPVENTQLQNEKLYLYLQNGRDMYVDQELDINRLSDYDVDHIVPQSFLKDD  
SIDNKVLTRSDKNRGKSDNVPSEEVVKKMKNYWRQLLNAKLITQRKFDNLTKAERGGLSEL  
DKAGFIKRQLVETRQITKHVAQILDSRMNTKYDENDKLIREVKVITLKS KLVSDFRKFDFQYKV  
REINNYHHAHDAYLNAVVG TALIKKYPKLESEFVYGDYKVYDVRKMIAKSEQEIGKATAKYFF  
YSNIMNFFKTEITLANGEIRKRPLIETNGETGEIVWDKGRDFATVRKVL SMPQVNIVKKTEVQT  
GGFSKESILPKRNSDKLIARKKDWDPK KYGGFDSPTVAYSVLVAKVEK GKSKKLKSVKELL  
GITIMERS SFEKNPIDFLEAKGYKEVKKDLI IKLPKYSLFELENGRKRMLASAGELQKGNELAL  
PSKYVNFYLYLASHYEKLGSPEDNEQKQLFVEQHKHYLDEIIEQISEFSKR VILADANLDK VLS  
AYNKHRDKPIREQAENIIHLFTLTNLGAPAAF KYFDTTIDRKRYTSTKEVLDATLIHQ SITGLYE  
TRIDLSQLGGDSGGSKRTADGSEFEP KKKR KV

**ABE8e-dimer**

MKRTADGSEFESP KKKR KVSEVEFSHEYW MRHALTLAKRAWDEREVPVGAVLVHNNRVIG  
EGWNRPIGRHDPTAHAEIMALRQGGLVMQNYRLIDATLYVTLEPCVMCAGAMIHSRIGRVVFG  
GARDAKTGAAGSLMDVLHHPGMNHRVEITEGILADECAALLSDFFRMRRQEIKAKKKAQSS  
TDSGGSSGGSSGSETPGTSESATPESSGGSSGGSSSEVEFSHEYW MRHALTLAKRARDER  
EVPVGAVLV LNNRVIGEGWNRAIGLHDPTAHAEIMALRQGGLVMQNYRLIDATLYVTFEPCV  
MCAGAMIHSRIGRVVFGVRNSKRGAAGSLMNVLNYPGMNHRVEITEGILADECAALLCDFY  
RMPRQVFNAQKKAQSSINSGGSSGGSSGSETPGTSESATPESSGGSSGGSDKKYSIGLAIG  
TNSVGWAVITDEYKVPSKKFKVLGNTDRHSIKKNLIGALLFDSGETAEATRLKRTARRRYTRR  
KNRICYLQEIFS NEMAKVDDSSFFHRLEESFLVEEDKKHERHPIFGNIVDEVAYHEKYPTIYHLR  
KKLVDSTDKADLR LIYLALAHMIKFRGHFLIEGDLNPDNSDVKLFIQLVQTYNQLFEENPINA  
SGVDAKAILSARLSKSRLENLIAQLPGEKKNGLFGNLIASLGLTPNFKSNFDLAEDAQLQLS  
KDTYDDDLNLLAQIGDQYADLFLAAKNLSDAILLSDILRVNTEITKAPLSASMIKRYDEHHQD  
LTLLKALVRQQLPEKYKEIFFDQSKNGYAGYIDGGASQEEFYKFIKPILEKMDGTEELLVKLN  
REDLLRKQRTFDNGSIPHQIHLGELHAILRRQEDFYFPLKDNREKIEKILTRIPYVVGPLARGN  
SRFAWMTRKSEETITPWNFEVVDK GASAQSFIERMTNFDKNLPNEKVLPKHSLLYEYFTVY  
NELTKVKYVTEGMRKPAFLSGEQKKAIVDLLFKTNRKVTVKQLKEDYFKKIECFDSVEISGVE

DRFNASLGTYHDLLKIIKDKDFLDNEENEDILEDIVLTLTLFEDREMIEERLKYAHLFDDKVMK  
QLKRRRYTGWGRLSRKLINGIRDKQSGKTILDFLKSDGFANRNFMLIHDDSLTFKEDIQKAQ  
VSGQDSLHEHIANLAGSPAIIKGIQTVKVVDELVKVMGRHKPENIVIEMARENQTTQKGQ  
KNSRERMKRIEEGKELGSQILKEHPVENTQLQNEKLYLYYLQNGRDMYVDQELDINRLSDY  
DVDHIVPQSFLKDDSIDNKVLTRSDKNRGKSDNVPSEEVVKKMKNYWRQLLNAKLITQRKFD  
NLTKAERGGELSELDKAGFIKRQLVETRQITKHVAQILDSRMNTKYDENDKLIREVKVITLKS  
VSDFRKDFQFYKVBREINNYHHAHDAYLNAVVGTAIIKKYPKLESEFVYGDYKVYDVRKMIAK  
SEQEIGKATAKYFFYSNIMNFFKTEITLANGEIRKRPLIETNGETGEIVWDKGRDFATVRKVL  
MPQVNIVKKTEVQTGGFSKESILPKRNSDKLIARKKDWDPKKYGGFDSPTVAYSVLVAKVE  
KGKSKLKSVKELLGITIMERSSSFENPIDFLEAKGYKEVKKDLIILPKYSLFELENGRKRMLA  
SAGELQKGNELALPSKYVNFLYLASHYEKLGSPEDNEQKQLFVEQHKHYLDEIIEQISEFSK  
RVILADANLDKVL SAYNKHRDKPIREQAENIIHLFTLTNLGAPAAFKYFDTTIDRKRYTSTKEVL  
DATLIHQ SITGLYETRIDLSQLGGDSGGSKRTADGSEFEPKKRKY

### SaABE8e

MKRTADGSEFESP KKKRKYSEVEFSHEYWMRHALTLAKRARDEREVPVGAVLVLNRRVIGE  
GWNRAIGLHDPTAHAEIMALRQGGLVMQNYRLIDATLYVTFEPCVMCAGAMIHSRIGRVVFG  
VRNSKRGAAGSLMNVLNYPGMNHRVEITEGILADECAALLCDFYRMPRQVFNAQKKAQSSI  
NSGGSSGGSSGSETPGTSESATPESSGGSSGGSGKRNILGLAIGITSVGYGIIDYETRDVID  
AGVRLFKEANVENNEGRRSKRGARRLKRRRRHRIQRVKLLFDYNLLTDHSELGINPYEAR  
VKGLSQKLSEEEFSAALLHLAKRRGVHNVNEVEEDTGNELSTKEQISRNSKALEEKYVAELQ  
LERLKKDGEVRGSINRFKTS DYVKEAKQLLKVQKAYHQLDQSFIDTYIDLLETRRTYYEGPGE  
GSPFGWKDIKEWYEMLMGHCTYFPEELRSVKYAYNADLYNALNDLNNLVITRDENEKLEY  
EKFQIENVFKQKKKPTLKQIAKEILVNEEDIKGYRVTSTGKPEFTNLKVYHDIKDITARKEIEN  
AELLDQIAKILTIYQSSEDIQEELTNLSEL TQEEIEQISNLKGYTGTHNLSLKAINLILDELWHT  
NDNQIAIFNRLKLVPKKVDLSQQKEIPTTLVDDFILSPVVKRSFIQSIVINAIKKYGLPNDIIEL  
AREKNSKDAQMINEMQKRNRQTNERIEEII RTTGKENAKYLIEKIKLHDMQEGKCLYSLEAIP  
LEDLLNPNFYVDHII PRSVSFDNSFNKVLVKQEENSKKGNRTPFQYLSSSDSKISYETFK  
KHILNLAKGKGRISKTKKEYLLEERDINRFSVQKDFINRNLVDTRYATRGLMNLRSYFRVNN  
LDVKVKSINGGFTSFLRRKWKFKKERNKGYKHAEDALIANADFIFKEWKKLDKAKKVMEN  
QMFEEKQAESMPEIETE QEYKEIFITPHQIKHIKDFKDYKYSHRVDKKNRELINDTLYSTRKD  
DKGNTLIVNNLNGLYDKDNDKLLKLINKSPEKLLMYHHPQTYQKLKLIMEQYGDEKNPLYK  
YYEETGNLYTKYSKKNNGPVIKKIKYYGNKLNALHDITDDYPNSRNKVVKLSLKPYPYRFDVYLD  
NGVYKFVTVKNLDVIKKENYYEVNSKCYEEAKKLLKISNQAEFIASFYNNDLIKINGELYRVIG  
VNNDLLNRIEVMIDITYREYLENMNDKRPPRIIKTIASKTQSIKKYSTDILGNLYEVKSKKHPQI  
IKKGGSGSKRTADGSEFEPKKRKY

### SaABE8e-dimer

MKRTADGSEFESP KKKRKYSEVEFSHEYWMRHALTLAKRAWDEREVPVGAVLVHNNRVIG  
EGWNRPIGRHDPTAHAEIMALRQGGLVMQNYRLIDATLYVTLEPCVMCAGAMIHSRIGRVVFG  
GARDAKTGAAGSLMDVLHHPGMNHRVEITEGILADECAALLSDFFRMRRQEIKAQKKAQSS  
TDSGGSSGGSSGSETPGTSESATPESSGGSSGGSSSEVEFSHEYWMRHALTLAKRARDER  
EVPVGAVLVLNRRVIGEGWNRAIGLHDPTAHAEIMALRQGGLVMQNYRLIDATLYVTFEPCV  
MCAGAMIHSRIGRVVFGVRNSKRGAAGSLMNVLNYPGMNHRVEITEGILADECAALLCDFY  
RMPRQVFNAQKKAQSSINS GGSSGGSSGSETPGTSESATPESSGGSSGGSGKRNILGLAI  
GITSVGYGIIDYETRDVIDAGVRLFKEANVENNEGRRSKRGARRLKRRRRHRIQRVKLLFDY  
NLLTDHSELGINPYEARVKGLSQKLSEEEFSAALLHLAKRRGVHNVNEVEEDTGNELSTKE  
QISRNSKALEEKYVAELQLERLKKDGEVRGSINRFKTS DYVKEAKQLLKVQKAYHQLDQSF  
DTYIDLLETRRTYYEGPGE GSPFGWKDIKEWYEMLMGHCTYFPEELRSVKYAYNADLYNAL

NDLNNLVITRDENEKLEYEKFQIIENVFKQKKKPTLKQIAKEILVNEEDIKGYRVTSTGKPEFT  
NLKVYHDIKDITARKEIENAELLDQIAKILTIYQSSEDIQEELTNLNSELTQEEIEQISNLKGYTG  
THNLSLKAINLILDELWHTNDNQIAIFNRLKLVPKKVDLSQQKEIPTTLVDDFILSPVVKRSFIQS  
IKVINAIKKYGLPNDIIELAREKNSKDAQKMINEMQKRNRQTNERIEEIIIRTTGKENAKYLIEKI  
KLHDMQEGKCLYSLEAIPLEDLLNPNFNYEVDHIIPRSVSFDNSFNKVLVKQEENSKKGNRT  
PFQYLSSSDSKISYETFKKHILNLAKGKGRISKTKKEYLLEERDINRFSVQKDFINRNLVDTRY  
ATRGLMNLRSYFRVNNLDVKVKSINGGFTSFLRRKWKFKKERNKGYKHAEDALIINANADFI  
FKEWKKLDKAKKVMENQMFEEKQAESMPEIETEQEYKEIFITPHQIKHIKDFKDYKYSHRVDK  
KPNRELINDTLYSTRKDDKGNTLIVNNLNGLYDKDNDKLLINKSPEKLLMYHHPQTYQKL  
KLIMEQYGDEKNPLYKYEEETGNLYTKYSKKNPVIKKIKYYYGNKLNALHDITDDYPNSRNK  
VVKLSLKPYRFDVYLDNGVYKFVTVKNLDVIKKENYYEVNSKCYEEAKKLLKISNQAEFIASF  
YNNDLIKINGELYRVIGVNNDLLNRIEVMIDITYREYLENMNDKRPPRIIKTIASKTQSIKKYST  
DILGNLYEVKSKKHPQIIKKGSGGSKRTADGSEFEPKKRKY

### **LbABE8e**

MKRTADGSEFESPCKKRKVSEVEFSHEYWMRHALTLAKRARDEREVPVGAVLVLNNRVIGE  
GWNRAIGLHDPTAHAEIMALRQGGLVMQNYRLIDATLYVTFEPCVMCAGAMIHSRIGRVVFG  
VRNSKRGAAGSLMNVLNYPGMNHRVEITEGILADECAALLCDFYRMPRQVFNAQKKAQSSI  
NSGGSSGGSSGSETPGTSESATPESSGGSSGGSSKLEFTNCYSLSKTLRFKAIPVGKTQE  
NIDNKRLLVEDEKRAEDYKGVKLLDRYYLSFINDVLHSIKLKNLNNYISLFRKKTRTEKENKE  
LENLEINLRKEIAKAFKGNEGYKSLFKKDIIETILPEFLDDKDEIALVNSFNGFTTAFTGFFDNRE  
NMFSEEAKSTSIAFRCINENLTRYISNMDIFEKVD AIFDKHEVQEIKEKILNSDYDVEDFFEGEF  
FNFVLTQEGIDVYNAIIGGFVTEGEEKIKGLNEYINLYNQKTKQKLPKFKPLYKQVLSDRESLS  
FYGEGYTSDEEVLEFRNTLNKNSEIFSSIKKLEKLFKNFDEYSSAGIFVKNPAISTISKDIFG  
EWNVIRDKWNAEYDDIHLKKKAVVTEKYEDDRRKSFKKIGSFSLEQLQEYADADLSVVEKLLK  
EIIIQKVDEIYKVYGSSEKLFDAADFVLEKSLKKNDAVVAIMKDLLDSVKSFENYKAFEGEKET  
NRDESFGDFVLAYDILLKVDHIYDAIRNYVTQKPYSKDKFKLYFQNPQFMGGWDKDKETDY  
RATILRYGSKYYLAIMDKKYAKCLQKIDKDDVNGNYEKINYKLLPGPNKMLPKVFFSKKWMA  
YYNPSEDIQKIYKNGTFKKGDMFNLNDCHKLIDFFKDSISRYPKWSNAYDFNFSETEKYKDIA  
GFYREVEEQGYKVSFESASKKEVDKLVVEEGKLYMFQIYNKDFSDKSHGTPNLHTMYFKLLF  
DENNHGQIRLSGGAELFMRRASLKEELVVHPANSPIANKNPDNPKTTTTLSYDVYKDKRFS  
EDQYELHIPIAINKCPKNIFKINTEVRVLLKHDDNPYVIGIARGERNLLYIVVDGKGNIVEQYSL  
NEIINNFNGIRIKTDYHSLLDKKEKERFEARQNWTSIENIKELKAGYISQVVHKICELVEKYDAVI  
ALEDLNSGFKNSRVKVEKQVYQKFEKMLIDKLNVMVDKKSNPCATGGALKGYQITNKFESFK  
SMSTQNGFIFYIPAWLTSKIDPSTGFVNLLKTKYTSIADSKKFISSFDRIMYVPEEDLFEFALDY  
KNFSRTDADYIKKWKLYSYGNRIRIFRNPKKNNVFDWEEVCLTSAYKELFNKYGINYQQGDI  
RALLCEQSDKAFYSSFMALMSLMLQMRNSITGRDVFDFLISPVKNSDGIFYDSRNYEAQENA  
ILPKNADANGAYNIARKVLWAIGQFKKAEDEKLDKVKIAISNKEWLEYAQTSVKSGGSKRTAD  
GSEFEPKKRKY

### **LbABE8e-dimer**

MKRTADGSEFESPCKKRKVSEVEFSHEYWMRHALTLAKRAWDEREVPVGAVLVHNNRVIG  
EGWNRPIGRHDPTAHAEIMALRQGGLVMQNYRLIDATLYVTFEPCVMCAGAMIHSRIGRVVFG  
GARDAKTGAAGSLMDVLHHPGMNHRVEITEGILADECAALLSDFFRMRRQEIKAKKAQSS  
TDSGGSSGGSSGSETPGTSESATPESSGGSSGGSSSEVEFSHEYWMRHALTLAKRARDER  
EVPVGAVLVLNNRVIGEGWNRPIGRHDPTAHAEIMALRQGGLVMQNYRLIDATLYVTFEPCV  
MCAGAMIHSRIGRVVFGVRNSKRGAAGSLMNVLNYPGMNHRVEITEGILADECAALLCDFY  
RMPRQVFNAQKKAQSSINSGGSSGGSSGSETPGTSESATPESSGGSSGGSSKLEFTNCY  
SLSKTLRFKAIPVGKTQENIDNKRLLVEDEKRAEDYKGVKLLDRYYLSFINDVLHSIKLKNLN

NYISLFRKKTRTEKENKELENLEINLRKEIAKAFKGNEGYKSLFKKDIETILPEFLDDKDEIALV  
NSFNGFTTAFTGFFDNRENMFSEEAKSTSIAFRCINENLTRYISNMDIFEKVD AIFDKHEVQEI  
KEKILNSDYDVEDFFEGEFFNFVLTQEGIDVYNAIIGGFVTESGEKIKGLNEYINLYNQKTKQK  
LPKFKPLYKQVLS DRESLSFYGEGYTSDEEVLEVFRNTLNKNSEIFSSIKKLEKLFKNFDEYS  
SAGIFVKN GPAISTISKDIFGEWNVIRDKWNAEYDDIHLKKKAVVTEKYEDDRRKSFKKIGSFS  
LEQLQEYADADLSVVEKLKEIIIQKVDEIYKVYGSSEKLFDA D FVLEKSLKKNDAVVAIMKDLL  
DSVKS FENYIKAFFGEGKETNRDES FYGDFVLAYDILLKVDHIYDAIRNYVTQKPYSKDKFKLY  
FQNPQFMGGW D KDKETDYRATILRYGSKYYLAIMDKKYAKCLQKIDKDDVNGNYEKINYKLL  
PGPNKMLPKVFFSKKWMAYYNPSEDIQKIYKNGTFKKGDMFNLNDCHKLIDFFKDSISRYPK  
WSNAYDFNFSETEKYKDIAGFYREVVEEQGYKVSFESASKKEVDKLV EEGKLYMFQIYNKDFS  
DKSHGTPNLHTMYFKLLFDENNHGQIRLSGGAELFMRRASLKKEELV VHPANSPIANKNPDN  
PKKTTTLSYDVYKDKRFSEDQYELHIPIAINKCPKNIFKINTEVRVLLKHDDNPYVIGIARGERN  
LLYIVVVDGKGNIVEQYSLNEIINNFNGIRIKTDYHSLLDKKEKERFEARQNWTSIENIKELKAG  
YISQVVHKICELVEKYDAVIALEDLNSGFKNSRVKVEKQVYQKFEKMLIDKLN YMVDKKS NPC  
ATGGALKGYQITNKFESFKSMSTQNGFIFYIPAWLTSKIDPSTGFVNLLKTKYTSIADSKKFISS  
FDRIMYVPEEDLFEFALDYKNFSRTDADYIKKWKLYSYGNRIRIFRNPKKNNVFDWEEVCLTS  
AYKELFNKYGINYQQGDIRALLCEQSDKAFYSSFMALMSLMLQMRNSITGRTD VDFLISPVK  
NSDGIFYDSRNYEAQENAILPKNADANGAYNIARKVLWAIGQFKKA EDEKLDKVKIAISNKEW  
LEYAQT SVKSGGSKRTADGSEFEPKKKRKV

**LbABE7.10**

MKRTADGSEFESP KKKRKVSEVEFSHEYWMRHALTLAKRAWDEREVPV GAVLVHNNRVIG  
EGWNRPIGRHDPTAHAEIMALRQGGLVMQNYRLIDATLYVTLEPCVMCAGAMIHSRIGRVVF  
GARDAKTGAAGSLMDVLHHPGMNHRVEITEGILADECAALLS DFFRMRRQEIKAQKKAQSS  
TDSGGSSGGSSGSETPGTSESATPESSGGSSGSSSEVEFSHEYWMRHALTLAKRARDER  
EVPV GAVLVLNRRVIGEGWNR AIGLHDPTAHAEIMALRQGGLVMQNYRLIDATLYVT FEPCV  
MCAGAMIHSRIGRVVFGVRNAKTGAAGSLMDVLHYPGMNHRVEITEGILADECAALLCYFFR  
MPRQVFNAQKKAQSSTDSGGSSGGSSGSETPGTSESATPESSGGSSGSSKLEKFTNCYS  
LSKTLRFKAIPVGKTQENIDNKRLLEVEDEKRAEDYKGVKLLDRYYLSFINDVLHSIKLKNLNN  
YISLFRKKTRTEKENKELENLEINLRKEIAKAFKGNEGYKSLFKKDIETILPEFLDDKDEIALVN  
SFNGFTTAFTGFFDNRENMFSEEAKSTSIAFRCINENLTRYISNMDIFEKVD AIFDKHEVQEI  
EKILNSDYDVEDFFEGEFFNFVLTQEGIDVYNAIIGGFVTESGEKIKGLNEYINLYNQKTKQKL  
PKFKPLYKQVLS DRESLSFYGEGYTSDEEVLEVFRNTLNKNSEIFSSIKKLEKLFKNFDEYSS  
AGIFVKN GPAISTISKDIFGEWNVIRDKWNAEYDDIHLKKKAVVTEKYEDDRRKSFKKIGSFS  
EQLQEYADADLSVVEKLKEIIIQKVDEIYKVYGSSEKLFDA D FVLEKSLKKNDAVVAIMKDLLD  
SVKS FENYIKAFFGEGKETNRDES FYGDFVLAYDILLKVDHIYDAIRNYVTQKPYSKDKFKLYF  
QNPQFMGGW D KDKETDYRATILRYGSKYYLAIMDKKYAKCLQKIDKDDVNGNYEKINYKLLP  
GPNKMLPKVFFSKKWMAYYNPSEDIQKIYKNGTFKKGDMFNLNDCHKLIDFFKDSISRYPKW  
SNAYDFNFSETEKYKDIAGFYREVVEEQGYKVSFESASKKEVDKLV EEGKLYMFQIYNKDFS  
KSHGTPNLHTMYFKLLFDENNHGQIRLSGGAELFMRRASLKKEELV VHPANSPIANKNPDNP  
KKT T T T LSYDVYKDKRFSEDQYELHIPIAINKCPKNIFKINTEVRVLLKHDDNPYVIGIARGERNL  
LYIVVVDGKGNIVEQYSLNEIINNFNGIRIKTDYHSLLDKKEKERFEARQNWTSIENIKELKAGY  
ISQVVHKICELVEKYDAVIALEDLNSGFKNSRVKVEKQVYQKFEKMLIDKLN YMVDKKS NPCA  
TGGALKGYQITNKFESFKSMSTQNGFIFYIPAWLTSKIDPSTGFVNLLKTKYTSIADSKKFISS  
DRIMYVPEEDLFEFALDYKNFSRTDADYIKKWKLYSYGNRIRIFRNPKKNNVFDWEEVCLTSA  
YKELFNKYGINYQQGDIRALLCEQSDKAFYSSFMALMSLMLQMRNSITGRTD VDFLISPVKN  
SDGIFYDSRNYEAQENAILPKNADANGAYNIARKVLWAIGQFKKA EDEKLDKVKIAISNKEWL  
EYAQT SVKSGGSKRTADGSEFEPKKKRKV

**enAsABE8e**

MKRTADGSEFESP KKKR KVSEVEFSHEYW MRHALTLAKRARDEREVPVGAVLVLN NRVIGE  
GWNRAIGLHDPTAHAEIMALRQGGLVMQNYRLIDATLYVTFEPCVMCAGAMIHSRIGRVVFG  
VRNSKRGAAGSLMNVLNYPGMNHRVEITEGILADECAALLCDFYRMPRQVFNAQKKAQSSI  
NSGGSSGGSSGSETPGTSESATPESSGGSSGGSSMTQFEGFTNLYQVSKTLRFELIPQGKTL  
KHIQEQGFIEEDKARNDHYKELKPIIDRIYKTYADQCLQLVQLD WENLSAAIDSYRKEKTEETR  
NALIEEQATYRNAIH DYFIGRTDNLTDAINKRHAEIYKGLFKAELFNGKVLKQLGTVTTTEHEN  
ALLRSFDKFTTYFSGFYRNRKNVFS AEDISTAIPHRIVQDNFPKFKENCHIFTRLITAVPSLREH  
FENVKKAIGIFVSTSIEEVFSFPFY NQLLTQTQIDLYNQLLGGISREAGTEKIKGLNEVLN LAIQK  
NDETAHIIASLPHRFIPLFKQILSDRNTLSFILEEFKSDEEVIQSFCKYKTLRNENVLETA EALF  
NELNSIDLTHIFISHKKLETISSALCDHWDTLRNALYERRISELTGKITKSAKEKVQRSLKHEDI  
NLQEIIISAAGKELSEAFKQKTSEILSHAHAALDQPLPTTLKKQEEKEILKSQLD SLLGLYHLLD  
WFAVDESNEVDPEFSARLTGIKLEMEPSLSFY NKARNYATKKPYSVEKFKLNFQMPTLARG  
WDVNREKNNGAILFVKNGLYYLGIMP KQKGRYKALSFEPTSEKTSSEGFDKMYDYFPDAAKMI  
PKCSTQLKAVTAHFQTHHTPILLSN NFIETKEIYDLNNPEKEPKKFQTAYAKKTGDQKGY  
REALCKWIDFTRDFLSKYTKTTSIDL SSLRPSSQYKDLGEYYAELNPLLYHISFQRIAEKEIMD  
AVETGKLYLFQIYNKDFAKGHHGKPNLHTLYWTGLFSPENLAKTSIKLNGQAELFYRPKSRM  
KRMAHRLGEKMLNKKLKDQKTPIDTLYQELYDYVNHRLSHDLSDEARALLPNVITKEVSHEI  
IKDRRFTSDKFFFHVPITLNYQAANSPSKFNQRVNAYLKEHPETPIIGIARGERNLIYITVIDSTG  
KILEQRSLNTIQQFDYQKKLDNREK ERVAARQAWSVVGTIKDLKQGYLSQVIHEIVDLMIH YQ  
AVVLENLNFGFKSKRTGIAEKAVYQQFEKMLIDKLNCLVLKDYP AEKVGGLNPNYQLTDQF  
TSFAKMGTQSGFLFYVPAPYTSKIDPLTGFVDPFVWKTIKNHESRKHFLLEGFDLHYDVKTG  
DFILHFKMNRNLSFQRGLPGFMPAWDIVFEKNETQF DAKGTPFIAGKRIVPV IENHRFTGRYR  
DLYPANELIALLEEKGIVFRDGSNILPKLLEND DSHAIDTMVALIRSVLQMRNSNAATGEDYIN  
SPVRDLNGVCFDSRFQNP EWPMADANGAYHIALKGQLLL NHLKESKDLKLQNGISNQDWL  
AYIQELRNSGGSKRTADGSEFEPK KKRKV

**enAsABE8e-dimer**

MKRTADGSEFESP KKKR KVSEVEFSHEYW MRHALTLAKRAWDEREVPVGAVLVHNNRVIG  
EGWNRPIGRHDPTAHAEIMALRQGGLVMQNYRLIDATLYVTLEPCVMCAGAMIHSRIGRVVFG  
GARDAKTGAAGSLMDVLHHPGMNHRVEITEGILADECAALLSDFFRMRRQEIKAKKAQSS  
TDSGGSSGGSSGSETPGTSESATPESSGGSSGGSSSEVEFSHEYW MRHALTLAKRARDER  
EVPVGAVLVLN NRVIGEGWNRAIGLHDPTAHAEIMALRQGGLVMQNYRLIDATLYVTFEPCV  
MCAGAMIHSRIGRVVFGVRNSKRGAAGSLMNVLNYPGMNHRVEITEGILADECAALLCDFY  
RMPRQVFNAQKKAQSSINS GGSSGGSSGSETPGTSESATPESSGGSSGGSSMTQFEGFTNL  
YQVSKTLRFELIPQGKTLKHIQEQGFIEEDKARNDHYKELKPIIDRIYKTYADQCLQLVQLDWE  
NLSAAIDSYRKEKTEETR NALIEEQATYRNAIH DYFIGRTDNLTDAINKRHAEIYKGLFKAELFN  
GKVLKQLGTVTTTEHENALLRSFDKFTTYFSGFYRNRKNVFS AEDISTAIPHRIVQDNFPKFK  
ENCHIFTRLITAVPSLREHFENVKKAIGIFVSTSIEEVFSFPFY NQLLTQTQIDLYNQLLGGISRE  
AGTEKIKGLNEVLN LAIQKNDETAHIIASLPHRFIPLFKQILSDRNTLSFILEEFKSDEEVIQSF  
KYKTLRNENVLETA EALFNELNSIDLTHIFISHKKLETISSALCDHWDTLRNALYERRISELTG  
KITKSAKEKVQRSLKHEDINLQEIIISAAGKELSEAFKQKTSEILSHAHAALDQPLPTTLKKQEE  
KEILKSQLD SLLGLYHLLDWFAVDESNEVDPEFSARLTGIKLEMEPSLSFY NKARNYATKKPY  
SVEKFKLNFQMPTLARGWDVNREKNNGAILFVKNGLYYLGIMP KQKGRYKALSFEPTSEKTS  
EGFDKMYDYFPDAAKMI PKCSTQLKAVTAHFQTHHTPILLSN NFIETKEIYDLNNPEKEP  
KKFQTAYAKKTGDQKGYREALCKWIDFTRDFLSKYTKTTSIDL SSLRPSSQYKDLGEYYAEL  
NPLLYHISFQRIAEKEIMDAVETGKLYLFQIYNKDFAKGHHGKPNLHTLYWTGLFSPENLAKT  
SIKLNQAELFYRPKSRMKRMAHRLGEKMLNKKLKDQKTPIDTLYQELYDYVNHRLSHDLS  
DEARALLPNVITKEVSHEI IKDRRFTSDKFFFHVPITLNYQAANSPSKFNQRVNAYLKEHPETP



IIGIARGERNLIYITVIDSTGKILEQRSLNTIQQFDYQKKLDNREKERVAARQAWSVVGTIKDLK  
QGYLSQVIHEIVDLMIHYQAVVLENLNFQFKSKRTGIAEKAVYQQFEKMLIDKLNCLVLKDY  
PAEKVGGVLPYQLTDQFTSFAKMGTQSGFLFYVPAPYTSKIDPLTGFVDPFVWKTIKNHES  
RKHFLGDFDLHYDVKTGDFILHFKMNRNLSFQRGLPGFMPAWDIVFEKNETQFDAKGTPI  
AGKRIVPVIEHRFTGRYRDLYPANELIALLEEKGIVFRDGSNILPKLLENDSDHAIDTMVALIR  
SVLQMRNSNAATGEDYINSPVRDLNGVCFDSRFQNPWPMADANGAYHIALKGQLLNHL  
KESKDLKLQNGISNQDWLAYIQELRNSGGSKRTADGSEFEPKKRKY

**enAsABE7.10**

MKRTADGSEFESPCKKRKVSEVEFSHEYWMRHALTLAKRAWDEREVPVGAVLVHNNRVIG  
EGWNRPIGRHDPTAHAEIMALRQGGLVMQNYRLIDATLYVTLEPCVMCAGAMIHSRIGRVVF  
GARDAKTGAAGSLMDVLHHPGMNHRVEITEGILADECAALLSDFFRMRRQEIKAKKKAQSS  
TDSGGSSGGSSGSETPGTSESATPESSGGSSGGSSSEVEFSHEYWMRHALTLAKRARDER  
EVPVGAVLVLNRRVIGEGWNRRAIGLHDPTAHAEIMALRQGGLVMQNYRLIDATLYVTLEPCV  
MCAGAMIHSRIGRVVFGVRNAKTGAAGSLMDVLHYPGMNHRVEITEGILADECAALLCYFFR  
MPRQVFNAQKKAQSSSTDSGGSSGGSSGSETPGTSESATPESSGGSSGGSSMTQFEGFTNL  
YQVSKTLRFELIPQGKTLKHIQEQGFIEEDKARNDHYKELKPIIDRIYKTYADQCLQLVQLDWE  
NLSAIDSYRKEKTEETRNALIEEQATYRNAIHDFYFIGRTDNLTDANKRHAIEYKGLFKAELFN  
GKVLKQLGTVTTTEHENALLRSFDKFTTYFSGFYRNRKNVFAEDISTAIPHRIVQDNFPKFK  
ENCHIFTRLITAVPSLREHFENVKKAIGIFVSTSIEEVFSFPFYQQLLTQTQIDLYNQLLGGISRE  
AGTEKIKGLNEVLNLAIQKNDETAHIIASLPHRFIPLFKQILSDRNTLSFILEEFKSDEEVIQSFC  
KYKTLRNENVLETAELFNELENSIDLTHIFISHKLETISSALCDHWDTLRNALYERRISELTG  
KITKSAKEKVQRSLKHEDINLQEIISAAGKELSEAFKQKTSEILSHAHAALDQPLPTTLKKQEE  
KEILKSQLDSSLGLYHLLDWFVAVDESNEVDPEFSARLTGIKLEMEPSLSFYNKARNYATKKPY  
SVEKFKLNFMPTLARGWDVNREKNNGAILFVKNGLYYLGIMPKQKGRYKALSFEPTSE  
GFDKMYDYFPDAAKMIPKCSTQLKAVTAHFQHTHTPILLSNNFIEPLEITKEIYDLNNPEKEP  
KKFQTAYAKKTGDQKGYREALCKWIDFTRDFLSKYTKTTSIDLSSLRPSSQYKDLGEYYAEL  
NPLLYHISFQRIAEKEIMDAVETGKLYLFQIYNKDFAKGHHGKPNLHTLYWTGLFSPENLAKT  
SIKLNQQAELFYRPKSRMKRMAHRLGEKMLNKKLKDQKTPIDTLYQELYDYVNHRLSHDLS  
DEARALLPNVITKEVSHEIHKDRRFTSDKFFFHVPITLNYQAANSPSKFNQRVNAYLKEHPETP  
IIGIARGERNLIYITVIDSTGKILEQRSLNTIQQFDYQKKLDNREKERVAARQAWSVVGTIKDLK  
QGYLSQVIHEIVDLMIHYQAVVLENLNFQFKSKRTGIAEKAVYQQFEKMLIDKLNCLVLKDY  
PAEKVGGVLPYQLTDQFTSFAKMGTQSGFLFYVPAPYTSKIDPLTGFVDPFVWKTIKNHES  
RKHFLGDFDLHYDVKTGDFILHFKMNRNLSFQRGLPGFMPAWDIVFEKNETQFDAKGTPI  
AGKRIVPVIEHRFTGRYRDLYPANELIALLEEKGIVFRDGSNILPKLLENDSDHAIDTMVALIR  
SVLQMRNSNAATGEDYINSPVRDLNGVCFDSRFQNPWPMADANGAYHIALKGQLLNHL  
KESKDLKLQNGISNQDWLAYIQELRNSGGSKRTADGSEFEPKKRKY

**NG-ABE8e**

MKRTADGSEFESPCKKRKVSEVEFSHEYWMRHALTLAKRARDERREVPVGAVLVLNRRVIG  
GWNRAIGLHDPTAHAEIMALRQGGLVMQNYRLIDATLYVTLEPCVMCAGAMIHSRIGRVVFG  
VRNSKRGAAAGSLMNVLPYPMNHRVEITEGILADECAALLCDFYRMPRQVFNAQKKAQSSI  
NSGGSSGGSSGSETPGTSESATPESSGGSSGGSSDKKYSIGLAIGTNSVGWAVITDEYKVP  
KKFKVLGNTDRHSIKKNLIGALLFDSGETAEATRLKRTARRRYTRRKNRICYLQEIFSNEMAK  
VDDSFHRLSEESFLVEEDKKHERHPIFGNIVDEVAYHEKYPTIYHLRKKLVDSTDKADLRILI  
ALAHMIKFRGHFLIEGDLNPDNSVDKLFQILVQTYNQLFEENPINASGVDKAILSARLSKSR  
RLENLIAQLPGEKKNLFGNLIALSLGLTPNFKSNFDLAEDAKLQLSKDQYDDDLNLLAQIG  
DQYADLFLAAKNLSDAILLSDILRVNTEITKAPLSASMIKRYDEHHQDLTLLKALVRQQLPEKY  
KEIFFDQSKNGYAGYIDGGASQEEFYKFIKPILEKMDGTEELLVKNLREDLLRKQRTFDNGSI

PHQIHLGELHAILRRQEDFYFPLKDNREKIEKILTFRIPYYVGPLARGNSRFAWMTRKSEETIT  
PWNFEVVDKGAQAQSFIERMTNFDKNLPNEKVLPHKSLLYEYFTVYNELTKVKYVTEGMR  
KPAFLSGEQKKAIVDLLFKTNRKVTVKQLKEDYFKKIECFDSVEISGVEDRFNASLGTYHDL  
KIIKDKDFLDNEENEDILEDIVLTLTLFEDREMIEERLKTIAHLFDDKVMKQLKRRRYTGWGRL  
SRKLINGIRDKQSGKTILDFLKSDGFANRNFMLIHDDSLTFKEDIQKAQVSGQGDSLHEHIA  
NLAGSPAIIKKGILQTVKVVDELVKVMGRHKPENIVIAMARENQTTQKGQKNSRERMKRIEEGI  
KELGSQILKEHPVENTQLQNEKLYLYLQNGRDMYVDQELDINRLSDYDQVDHIVPQSFLKDD  
SIDNKVLTRSDKNRGKSDNVPSEEVVKKMKNYWRQLLNAKLITQRKFDNLTKAERGGLSEL  
DKAGFIKRQLVETRQITKHVAQILDSRMNTKYDENDKLIREVKVITLKSCLVSDFRKDFQFYKV  
REINNYHHAHDAYLNAVVGTAIIKKYPKLESEFVYGDYKVDVRKMIKSESEQEIGKATAKYFF  
YSNIMNFFKTEITLANGEIRKRPLIETNGETGEIVWDKGRDFATVRKVL SMPQVNIVKKTEVQT  
GGFSKESIRPKRNSDKLIARKKDWDPKKYGGFVSPTVAYSVLVAKVEKKGKSKKLKSVKELL  
GITIMERSSEFEKNPIDFLEAKGYKEVKKDLIILPKYSLFELENGRKRMLASARFLQKGNELAL  
PSKYVNFLYLASHYEKLGKSPEDNEQKQLFVEQHKHYLDEIIEQISEFSKRVLADANLDKVL  
SAYNKHRDKPIREQAENIIHLFTLTNLGAPRAFKYFDTTIDRKVYRSTKEVL DATLIHQ  
SITGLYETRIDLSQLGGDSGGSKRTADGSEFEPKKKRKV

**NG-ABE8e-dimer**

MKRTADGSEFESPCKKRKVSEVEFSHEYWMRHALTLAKRAWDEREVPVGAVLVHNNRVIG  
EGWNRPIGRHDPTAHAEIMALRQGGLVMQNYRLIDATLYVTLEPCVMCAGAMIHSRIGRVV  
F GARDAKTGAAGSLMDVLHHPGMNHRVEITEGILADECAALLSDFFRMRRQEIKAKKAQSS  
TDSGGSSGGSSGSETPGTSESATPESGGSSGGSSSEVEFSHEYWMRHALTLAKRARDER  
EVPVGAVLVLNRRVIGEGWNRAIGLHDPTAHAEIMALRQGGLVMQNYRLIDATLYVTLEPCV  
MCAGAMIHSRIGRVVFGVRNSKRGAAAGSLMNVLNYPGMNHRVEITEGILADECAALLCDFY  
RMPRQVFNAQKAQSSINSGGSSGGSSGSETPGTSESATPESGGSSGGSSDKKYSIGLAIG  
TNSVGWAVITDEYKVPKFKVLGNTDRHSIKKNLIGALLFDSGETAEATRLKRTARRRYTRR  
KNRICYLQEIFSNEMAKVDDSFHRLSEESFLVEEDKKHERHPIFGNIVDEVAYHEKYPTIYHLR  
KKLVDSTDKADLRILIYLAHAMIKFRGHFLIEGDLNPDNSDVKLFIQLVQTYNQLFEENPINA  
SGVDAKAILSARLSKSRLENLIAQLPGEKKNLFGNLIASLGLTPNFKSNFDLAEDAKLQLS  
KDTYDDDLNLLAQIGDQYADFLAAKNLSDAILLSDILRVNTEITKAPLSASMIKRYDEHHQD  
LTLLKALVRQQLPEKYKEIFFDQSKNGYAGYIDGGASQEEFYKFIKPILEKMDGTEELLVKLNR  
EDLLRKQRTFDNGSIPHQIHLGELHAILRRQEDFYFPLKDNREKIEKILTFRIPYYVGPLARGN  
SRFAWMTRKSEETITPWNFEVVDKGAQAQSFIERMTNFDKNLPNEKVLPHKSLLYEYFTVY  
NELTKVKYVTEGMRKPAFLSGEQKKAIVDLLFKTNRKVTVKQLKEDYFKKIECFDSVEISGVE  
DRFNASLGTYHDLKIIKDKDFLDNEENEDILEDIVLTLTLFEDREMIEERLKTIAHLFDDKVMK  
QLKRRRYTGWGRLSRKLINGIRDKQSGKTILDFLKSDGFANRNFMLIHDDSLTFKEDIQKAQ  
VSGQGDSLHEHIANLAGSPAIIKKGILQTVKVVDELVKVMGRHKPENIVIAMARENQTTQKGQ  
KNSRERMKRIEEGIKELGSQILKEHPVENTQLQNEKLYLYLQNGRDMYVDQELDINRLSDY  
DQVDHIVPQSFLKDDSIDNKVLTRSDKNRGKSDNVPSEEVVKKMKNYWRQLLNAKLITQRKFD  
NLTKAERGGLSELDKAGFIKRQLVETRQITKHVAQILDSRMNTKYDENDKLIREVKVITLKSCL  
VSDFRKDFQFYKVREINNYHHAHDAYLNAVVGTAIIKKYPKLESEFVYGDYKVDVRKMIK  
SESEQEIGKATAKYFFYSNIMNFFKTEITLANGEIRKRPLIETNGETGEIVWDKGRDFATVRKVL  
SMPQVNIVKKTEVQTGGFSKESIRPKRNSDKLIARKKDWDPKKYGGFVSPTVAYSVLVAKVE  
KKGKSKKLKSVKELLGITIMERSSEFEKNPIDFLEAKGYKEVKKDLIILPKYSLFELENGRKRMLA  
SARFLQKGNELALPSKYVNFLYLASHYEKLGKSPEDNEQKQLFVEQHKHYLDEIIEQISEFSK  
RVILADANLDKVL SAYNKHRDKPIREQAENIIHLFTLTNLGAPRAFKYFDTTIDRKVYRSTKEVL  
DATLIHQ  
SITGLYETRIDLSQLGGDSGGSKRTADGSEFEPKKKRKV

**SaKKH-ABE8e**

MKRTADGSEFESP KKKR KVSEVEFSHEYW MRHALTLAKRARDEREVPVGAVLVLN NRVIGE  
GWNRAIGLHDPTAHAEIMALRQGGLVMQNYRLIDATLYVTFEPCVMCAGAMIHSRIGRVVFG  
VRNSKRGAAAGSLMNVLNYPGMNHRVEITEGILADECAALLCDFYRMPRQVFNAQKKAQSSI  
NSGGSSGGSSGSETPGTSESATPESSGGSSGGSGKRNYILGLAIGITSVGYGIIDYETRDVID  
AGVRLFKEANVENNEGRRSKRGARRLKRRRRRHRIQRVKLLFDYNLLTDHSELSGINPYEAR  
VKGLSQKLSEEEFSAALLHLAKRRGVHNVNEVEEDTGNELSTKEQISRNSKALEEKYVAELQ  
LERLKKDGEVRGSINRFKTS DYVKEAKQLLKVQKAYHQLDQSFIDTYIDLLETRRYYEGPGE  
GSPFGWKDIKEWYEMLMGHCTYFPEELRSVKYAYNADLYNALNDLNNLVITRDENEKLEYY  
EKFQIENVFKQKKKPTLKQIAKEILVNEEDIKGYRVTSTGKPEFTNLKVYHDIKDITARKEIEN  
AELLDQIAKILTIYQSSEDIQEELTNL NSELTQEEIEQISNLKGYTGTHNLSLKAINLILDELWHT  
NDNQIAIFNRLKLV PPKVDLSQQKEIPTTLVDDFILSPVVKRSFIQS IKVINAIKKYGLPNDIII EL  
AREKNSKDAQKMINEMQKRNRQTNERIEEII RTTGKENAKYLIEKIKLHDMQEGKCLYSLEAIP  
LEDLLNPNFNYEVDHII PRSVSFDNSFN NKVLVKQEENSKKGNRTPFQYLSSSDSKISYETFK  
KHILNLA KGKGRISKTKKEYLLEERDINRFSVQKDFINRNLVDTRYATRGLMNL LRSYFRVNN  
LDVKVKSINGGFTSFLRRKWKFKKERNKGYKHAEDALI ANADFIFKEWKKLDKAKKVMEN  
QMFE EKQAESMPEIETE QEYKEIFITPHQIKHIKDFKDYKYSHRVDKKNRELINDTL YSTRKD  
DKGNTLIVNNLNGLYDKDNDK LKLINKSPEKLLMYHHPQTYQKLKLIMEQYGDEKNPLYK  
YYEETGNYLTKYSKKN DNGPVIKKIKYYGNKLN AHL DITDDYPNSRNKVVKLSLKP YRFDVYLD  
NGVYKFVTVKNLDVIKKENYYEVNSKCYEEAKK LKISNQAEFIASFYNNDLIKINGEL YRVIG  
VNNDLLNRIEVNMIDITYREYLENMNDKRPPRII KTIASKTQSIKKYSTDILGNLYEVKSKKHPQI  
IKKGSGGSKRTADGSEFEPK KKRKV

**SaKKH-ABE8e-dimer:**

MKRTADGSEFESP KKKR KVSEVEFSHEYW MRHALTLAKRAWDEREVPVGAVLVHNNRVIG  
EGWNRPIGRHDPTAHAEIMALRQGGLVMQNYRLIDATLYVTLEPCVMCAGAMIHSRIGRVVFG  
GARDAKTGAAGSLMDVLHHPGMNHRVEITEGILADECAALLSDFFRMRRQEIKAKKKAQSS  
TDSGGSSGGSSGSETPGTSESATPESSGGSSGGSSSEVEFSHEYW MRHALTLAKRARDER  
EVPVGAVLVLN NRVIGEGWNRRAIGLHDPTAHAEIMALRQGGLVMQNYRLIDATLYVTFEPCV  
MCAGAMIHSRIGRVVFGVRNSKRGAAAGSLMNVLNYPGMNHRVEITEGILADECAALLCDFY  
RMPRQVFNAQKKAQSSINS GGSSGGSSGSETPGTSESATPESSGGSSGGSGKRNYILGLAI  
GITSVGYGIIDYETRDVIDAGVRLFKEANVENNEGRRSKRGARRLKRRRRRHRIQRVKLLFDY  
NLLTDHSELSGINPYEARVKGLSQKLSEEEFSAALLHLAKRRGVHNVNEVEEDTGNELSTKE  
QISRNSKALEEKYVAELQLERLKKDGEVRGSINRFKTS DYVKEAKQLLKVQKAYHQLDQSF I  
DTYIDLLETRRYYEGPGE GSPFGWKDIKEWYEMLMGHCTYFPEELRSVKYAYNADLYNAL  
NDLNNLVITRDENEKLEYYEKFQIENVFKQKKKPTLKQIAKEILVNEEDIKGYRVTSTGKPEFT  
NLKVYHDIKDITARKEIENAE LLDQIAKILTIYQSSEDIQEELTNL NSELTQEEIEQISNLKGYTG  
THNLSLKAINLILDELWHTNDNQIAIFNRLKLV PPKVDLSQQKEIPTTLVDDFILSPVVKRSFIQS  
IKVINAIKKYGLPNDIII ELAREKNSKDAQKMINEMQKRNRQTNERIEEII RTTGKENAKYLIEKI  
KLHDMQEGKCLYSLEAIPLEDLLNPNFNYEVDHII PRSVSFDNSFN NKVLVKQEENSKKGNRT  
PFQYLSSSDSKISYETFKKHILNLA KGKGRISKTKKEYLLEERDINRFSVQKDFINRNLVDTRY  
ATRGLMNL LRSYFRVNNLDVKVKSINGGFTSFLRRKWKFKKERNKGYKHAEDALI ANADFI  
FKEWKKLDKAKKVMENQMFE EKQAESMPEIETE QEYKEIFITPHQIKHIKDFKDYKYSHRVDK  
KPNRELINDTL YSTRKDDKGNTLIVNNLNGLYDKDNDK LKLINKSPEKLLMYHHPQTYQKL  
KLIMEQYGDEKNPLYKY YEETGNYLTKYSKKN DNGPVIKKIKYYGNKLN AHL DITDDYPNSRNK  
VVKLSLKP YRFDVYLDNGVYKFVTVKNLDVIKKENYYEVNSKCYEEAKK LKISNQAEFIASF  
YNNDLIKINGEL YRVIGVNNDLLNRIEVNMIDITYREYLENMNDKRPPRII KTIASKTQSIKKYST  
DILGNLYEVKSKKHPQIIKKGSGGSKRTADGSEFEPK KKRKV

**CP1028-ABE8e**

MKRTADGSEFESP KKKR KVSEVEFSHEYW MRHALTLAKRARDEREVPVGAVLVLN NRVIGE  
GWNRAIGLHDPTAHAEIMALRQGGLVMQNYRLIDATLYVTFEPCVMCAGAMIHSRIGRVVFG  
VRNSKRGAAGSLMNVLNYPGMNHRVEITEGILADECAALLCDFYRMPRQVFNAQKKAQSSI  
NSGGSSGGSSGSETPGTSESATPESSGGSSGGSEIGKATAKYFFYSNIMNFFKTEITLANGE  
IRKRPLIETNGETGEIVWDKGRDFATVRKVL SMPQVNIVKKTEVQTGGFSKESILPKRNSDKLI  
ARKKDWDPKKYGGFDSPTVAYSVLVVAKVEKGKSKKLKSVKELLGITIMERS SFEKNPIDFLE  
AKGYKEVKKDLIIKLPKYSLFELENGRKRMLASAGELQKGNELALPSKYVNFLYLASHYEKLG  
GSPEDNEQKQLFVEQHKHYLDEIIIEQISEFSKRVLADANLDKVL SAYNKHRDKPIREQAENII  
HLFTLTNLGAPAAFKYFDTTIDRKRYTSTKEVL DATLIHQ SITGLYETRIDLSQLGGDGGSSGS  
GGSSGGSSGGSSGGMDKKYSIGLAIGTNSVGWAVITDEYKVP SKKFKVLGNTDRHSIKKNLI  
GALLFDSGETAEATRLKRTARRRYTRRKNRICYLQEIFSNEMAKVDD SFFHRLEESFLVEED  
KKHERHPIFGNIVDEVAYHEKYPTIYHLRKKLVDSTDKADLR LIYLALAHMIKFRGHFLIEGDLN  
PDNSDVKLFIQLVQTYNQLFEENPINASGVDAKAILSARLSKSRREN LIAQLPGEKKNGLF  
GNLIALSLGLTPNFKSNFDLAEDAKLQLSKD TYDDDLDNLLAQIGDQYADLFLAAKNLSDAILL  
SDILRVNTEITKAPLSASMIKRYDEHHQDLTLLKALVRQQLPEKYKEIFFDQSKNGYAGYIDGG  
ASQEEFYKFIKPILEKMDGTEELLVKNREDLLRKQRTFDNGSIPHQIHLGELHAILRRQEDFY  
PFLKDNREKIEKILTRIPYYVGPLARGNSRFAWMTRKSEETITPWNFE EVVDKGASAQSFIE  
RMTNFDKNLPNEKVLPHSLLYEYFTVYNELTKVKYVTEGMRKPAFLSGEQKKAIVDLLFKT  
NRKVTVKQLKEDYFKKIECFDSVEISGVEDRFNASLGT YHDLLKIIKDKDFLDNEENEDILEDIV  
LTTLTFEDREMIEERLKYAHLFDDKVMKQLKRRRYTGWGRLSRKLINGIRDKQSGKTILDFL  
KSDGFANRNFMQLIHDDSLTFKEDIQKAQVSGQGD SLHEHIANLAGSPA IKKGILQTVKVVDE  
LVKVMGRHKPENIVIEMARENQTTQKGQKNSRERMKRIEEGIKELGSQILKEHPVENTQLQN  
EKLYLYYLQNGRDMYVDQELDINRLSDYDVDHIVPQSFLKDDSIDNKVLTRSDKNRGKSDNV  
PSEEVVKKMKNYWRQLLNAKLITQRKFDNLTKAERGG SELDKAGFIKRQLVETRQITKHVA  
QILDSRMNTKYDENDKLIREVKVITLKSKLVSDFRKDFQFYK VREINNYHHAHDAYLNAVGT  
ALIKKYPKLESEFVYGDYKVYDVRKMIKSEQSGGSKRTADGSEFEPK KKRKV

**CP1028-ABE8e-dimer**

MKRTADGSEFESP KKKR KVSEVEFSHEYW MRHALTLAKRAWDEREVPVGAVLVHNNRVIG  
EGWNRPIGRHDPTAHAEIMALRQGGLVMQNYRLIDATLYVTLEPCVMCAGAMIHSRIGRVVFG  
GARDAKTGAAGSLMDVLHHPGMNHRVEITEGILADECAALLSDFFRMRRQE IKAQKKAQSS  
TDSGGSSGGSSGSETPGTSESATPESSGGSSGGSSSEVEFSHEYW MRHALTLAKRARDER  
EVPVGAVLVLN NRVIGEGWNRAIGLHDPTAHAEIMALRQGGLVMQNYRLIDATLYVTFEPCV  
MCAGAMIHSRIGRVVFGVRNSKRGAAGSLMNVLNYPGMNHRVEITEGILADECAALLCDFY  
RMPRQVFNAQKKAQSSINS GGSSGGSSGSETPGTSESATPESSGGSSGGSEIGKATAKYF  
FYSNIMNFFKTEITLANGEIRKRPLIETNGETGEIVWDKGRDFATVRKVL SMPQVNIVKKTEVQ  
TGGFSKESILPKRNSDKLIARKKDWDPKKYGGFDSPTVAYSVLVVAKVEKGKSKKLKSVKEL  
LGITIMERS SFEKNPIDFLEAKGYKEVKKDLIIKLPKYSLFELENGRKRMLASAGELQKGNELA  
LPSKYVNFLYLASHYEKLGSPEDNEQKQLFVEQHKHYLDEIIIEQISEFSKRVLADANLDKVL  
SAYNKHRDKPIREQAENIIHLFTLTNLGAPAAFKYFDTTIDRKRYTSTKEVL DATLIHQ SITGLY  
ETRIDLSQLGGDGGSSGGSSGGSSGGSSGGMDKKYSIGLAIGTNSVGWAVITDEYKVP  
SKKFKVLGNTDRHSIKKNLIGALLFDSGETAEATRLKRTARRRYTRRKNRICYLQEIFSNEMA  
KVDD SFFHRLEESFLVEEDKKHERHPIFGNIVDEVAYHEKYPTIYHLRKKLVDSTDKADLR LIY  
LALAHMIKFRGHFLIEGDLNPDNSDVKLFIQLVQTYNQLFEENPINASGVDAKAILSARLSK  
SRLENLIAQLPGEKKNGLFGNLIALSLGLTPNFKSNFDLAEDAKLQLSKD TYDDDLDNLLAQI  
GDQYADLFLAAKNLSDAILLSDILRVNTEITKAPLSASMIKRYDEHHQDLTLLKALVRQQLPEK  
YKEIFFDQSKNGYAGYIDGGASQEEFYKFIKPILEKMDGTEELLVKNREDLLRKQRTFDNGS  
IPHQIHLGELHAILRRQEDFY PFLKDNREKIEKILTRIPYYVGPLARGNSRFAWMTRKSEETIT

PWNFEEVVDKGASAQSFIERMTNFDKNLPNEKVLPKHSLLEYEYFTVYNELTKVKYVTEGMR  
KPAFLSGEQKKAIVDLLFKTNRKVTVKQLKEDYFKKIECFDSVEISGVEDRFNASLGTYHDLL  
KIIKDKDFLDNEENEDILEDIVLTLTLFEDREMIEERLKYAHLFDDKVMKQLKRRRYTGWGRL  
SRKLINGIRDKQSGKTILDFLKSDGFANRNFMLIHDDSLTFKEDIQKAQVSGQGDSLHEHIA  
NLAGSPAIKKGILQTVKVVDELVKVMGRHKPENIVIAMARENQTTQKGQKNSRERMKRIEEGI  
KELGSQILKEHPVENTQLQNEKLYLYLQNGRDMYVDQELDINRLSDYDVDHIVPQSFLKDD  
SIDNKVLTRSDKNRGKSDNVPSEEVVKKMKNYWRQLLNAKLITQRKFDNLTKAERGGLSEL  
DKAGFIKRQLVETRQITKHVAQILDSRMNTKYDENDKLIREVKVITLKSCLVSDFRKDFQFYKV  
REINNYHHAHDAYLNAVVG TALIKKYPKLESEFVYGDYKVYDVRKMIAKSEQSGGSKRTADG  
SEFEPKKRKY

### **CP1041-ABE8e**

MKRTADGSEFESPCKKRKYSEVEFSHEYWMRHALTLAKRARDEREVPVGAVLVLNNRVIGE  
GWNRAIGLHDPTAHAEIMALRQGGLVMQNYRLIDATLYVTFEPCVMCAGAMIHSRIGRVVFG  
VRNSKRGAAGSLMNVLNYPGMNHRVEITEGILADECAALLCDFYRMPRQVFNAQKKAQSSI  
NSGGSSGGSSGSETPGTSESATPESSGGSSGGSNIMNFFKTEITLANGEIRKRPLIETNGET  
GEIVWDKGRDFATVRKVL SMPQVNIKKTEVQTGGFSKESILPKRNSDKLIARKKDWDPKKY  
GGFDSPTVAYSVLVAKVEKGKSKLKS VKELLGITIMERS SFEKNPIDFLEAKGYKEVKKDLI  
IKLPKYSLFELNGRKRMLASAGELQKGNELALPSKYVNFY LASHYEKLKGGSPEDNEQKQL  
FVEQHKHYLDEIIEQISEFSKRVLADANLDKVL SAYNKH RDKPIREQAENIIHLFTLTNLGAPA  
AFKYFDTTIDRKRYTSTKEVLDATLIHQ SITGLYETRIDLSQLGGDGGSSGGSSGGSSGGSSG  
SSGGDKKYSIGLAIGTNSVGWAVITDEYKVPSKKFKVLGNTDRHSIKKNLIGALLFDSGETAE  
ATRLKRTARRRYTRRKNRICYLQEIFSNEMAKVDDSSFFHRLEESFLVEEDKKHERHPIFGNIV  
DEVAYHEKYPTIYHLRKKLVDSTDKADLRLIYLALAHMIKFRGHFLIEGDLNPDNSDVKLFIQ  
LVQTYNQLFEENPINASGVDAKAILSARLSKSRLENLIAQLPGEKKNGLFGNLIASLGLTPN  
FKSNFDLAEDAQLQSKD TYDDLDNLLAQIGDQYADLFLAAKNLSDAILLSDILRVNTEITKA  
PLSASMIKRYDEHHQDLTLLKALVRQQLPEKYKEIFFDQSKNGYAGYIDGGASQEEFYKFIKP  
ILEKMDGTEELLVKLNREDLLRKQRTFDNGSIPHQIHLGELHAILRRQEDFYFPLKDNREKIEKI  
LTFRIPYYVGPLARGNSRFAMTRKSEETITPWNFEEVVDKGASAQSFIERMTNFDKNLPNE  
KVLPKHSLLEYEYFTVYNELTKVKYVTEGMRKPAFLSGEQKKAIVDLLFKTNRKVTVKQLKEDY  
FKKIECFDSVEISGVEDRFNASLGTYHDLLKIIKDKDFLDNEENEDILEDIVLTLTLFEDREMIEE  
RLKYAHLFDDKVMKQLKRRRYTGWGRLSRKLINGIRDKQSGKTILDFLKSDGFANRNFML  
IHDDSLTFKEDIQKAQVSGQGDSLHEHIANLAGSPAIKKGILQTVKVVDELVKVMGRHKPENI  
VIAMARENQTTQKGQKNSRERMKRIEEGIKELGSQILKEHPVENTQLQNEKLYLYLQNGRD  
MYVDQELDINRLSDYDVDHIVPQSFLKDDSIDNKVLTRSDKNRGKSDNVPSEEVVKKMKNY  
WRQLLNAKLITQRKFDNLTKAERGGLSELDKAGFIKRQLVETRQITKHVAQILDSRMNTKYDE  
NDKLIREVKVITLKSCLVSDFRKDFQFYKVREINNYHHAHDAYLNAVVG TALIKKYPKLESEFV  
YGDYKVYDVRKMIAKSEQEIGKATAKYFFYSSGGSKRTADGSEFEPKKRKY

### **ABE8e(TadA-8e V106W)**

MKRTADGSEFESPCKKRKYSEVEFSHEYWMRHALTLAKRARDEREVPVGAVLVLNNRVIGE  
GWNRAIGLHDPTAHAEIMALRQGGLVMQNYRLIDATLYVTFEPCVMCAGAMIHSRIGRVVFG  
WRNSKRGAAGSLMNVLNYPGMNHRVEITEGILADECAALLCDFYRMPRQVFNAQKKAQSSI  
NSGGSSGGSSGSETPGTSESATPESSGGSSGGSDKKYSIGLAIGTNSVGWAVITDEYKVPS  
KKFKVLGNTDRHSIKKNLIGALLFDSGETAEATRLKRTARRRYTRRKNRICYLQEIFSNEMAK  
VDDSSFFHRLEESFLVEEDKKHERHPIFGNIVDEVAYHEKYPTIYHLRKKLVDSTDKADLRLIYL  
ALAHMIKFRGHFLIEGDLNPDNSDVKLFIQLVQTYNQLFEENPINASGVDAKAILSARLSKSR  
RLENLIAQLPGEKKNGLFGNLIASLGLTPNFKSNFDLAEDAQLQSKD TYDDLDNLLAQIG  
DQYADLFLAAKNLSDAILLSDILRVNTEITKAPLSASMIKRYDEHHQDLTLLKALVRQQLPEKY

KEIFFDQSKNGYAGYIDGGASQEEFYKFIKPILEKMDGTEELLVKLNREDLLRKQRTFDNGSI  
PHQIHLGELHAILRRQEDFYFPLKDNREKIEKILTFRIPYYVGPLARGNSRFAMTRKSEETIT  
PWNFEEVVDKGASAQSFIERMTNFDKNLPNEKVLPKHSLLYEYFTVYNELTKVKYVTEGMR  
KPAFLSGEQKKAIVDLLFKTNRKVTVKQLKEDYFKKIECFDSVEISGVEDRFNASLGTYHDL  
KIIKDKDFLDNEENEDILEDIVLTLTFEDREMIEERLKYAHLFDDKVMKQLKRRRYTGWGRL  
SRKLINGIRDKQSGKTILDFLKSDGFANRFMQLIHDDSLTFKEDIQKAQVSGQGDLSHEHIA  
NLAGSPAIKKGILQTVKVVDELVKVMGRHKPENIVIEMARENQTTQKGQKNSRERMKRIEEGI  
KELGSQILKEHPVENTQLQNEKLYLYLQNGRDMYVDQELDINRLSDYDVDHIVPQSFLKDD  
SIDNKVLTRSDKNRGKSDNVPSEEVVKKMKNYWRQLLNAKLITQRKFDNLTKAERGGLSEL  
DKAGFIKRQLVETRQITKHVAQILDSRMNTKYDENDKLIREVKVITLKSCLVSDFRKDFQFYKV  
REINNYHHAHDAYLNAVVGTAIIKKYPKLESEFVYGDYKVYDVRKMIKSEQEIGKATAKYFF  
YSNIMNFFKTEITLANGEIRKRPLIETNGETGEIVWDKGRDFATVRKVL SMPQVNIVKKTEVQT  
GGFSKESILPKRNSDKLIARKKDWDPKKGFFSPTVAVSVLVAKVEKKGSKKLSVKELL  
GITIMERSSEFEKNPIDFLEAKGYKEVKKDLIILPKYSLFELENGRKRMLASAGELQKGNELAL  
PSKYVNFYLYLASHYEKLGKSPEDNEQKQLFVEQHKHYLDEIIEQISEFSKRVLADANLDKVL  
AYNKHRDKPIREQAENIIHLFTLTNLGAPAAFYFDTTIDRKRYTSTKEVLDATLIHQSI  
GLYE TRIDLSQLGGDSGGSKRTADGSEFEPKKRKV

**SaABE8e(TadA-8e V106W)**

MKRTADGSEFESPKKKRKVSEVEFSHEYWMRHALTLAKRARDEREVPVGAVLVLNNRVIGE  
GWNRAIGLHDPTAHAEIMALRQGGLVMQNYRLIDATLYVTFEPCVMCAGAMIHSRIGRVVFG  
WRNSKRGAAGSLMNVLNYPGMNHRVEITEGILADECAALLCDFYRMPRQVFNAQKKAQSSI  
NSGGSSGGSSGSETPGTSESATPESSGGSSGGSGKRNILGLAIGITSVGYGIIDYETRDVID  
AGVRLFKEANVENEGRRSKRGARRLKRRRRRHRIQRVKLLFDYNLLTDHSELSGINPYEAR  
VKGLSQKLSEEEFSAALLHLAKRRGVHNVNEVEEDTGNELSTKEQISRNSKALEEKYVAELQ  
LERLKKDGEVRGSINRFKTSYVKEAKQLLVQKAYHQLDQSFIDTYIDLLETRRTYYEGPGE  
GSPFGWKDIKEWYEMLMGHCTYFPEELRSVKYAYNADLYNALNDLNNLVITRDENEKLEYY  
EKFQIIENVFKQKKKPTLKQIAKEILVNEEDIKGYRVTSTGKPEFTNLKVYHDIKDITARKEIEN  
AELLDQIAKILTIIYQSSEDIQEELTNLNSLQEEIEQISNLKGYTGTHNLSLKAINLILDELWHT  
NDNQIAIFNRLKLVPKKVDLSQQKEIPTTLVDDFILSPVVKRSFIQSIKVINAIKKYGLPNDIIEL  
AREKNSKDAQKMINEMQKRNRQTNERIEEIIRTTGKENAKYLIEKIKLHDMQEGKCLYSLEAIP  
LEDLLNPFNYEVDHIIIPRSVSFDNSFNKVLVKQEENSKKGNRTPFQYLSSSDSKISYETFK  
KHILNLAGKGRISKTKKEYLLEERDINRFSVQKDFINRNLVDTRYATRGLMNLRSYFRVNN  
LDVKVKSINGGFTSFLRRKWKFKKERNKGYKHAEDALIANADFIFKEWKLDKAKKVMEN  
QMFEKQAESMPEIETEQEYKEIFITPHQIKHIKDFKDYKYSHRVDKKPNRELINDTLYSTRKD  
DKGNTLIVNNLNGLYDKDNDKLLKLINKSPEKLLMYHHPQTYQKLKLIMEQYGDEKNPLYK  
YYEETGNLYTKYSKKDNGPVIKKIKYYGNKLNALHDITDDYPNSRNKVVKLSLKPFRFDVYLD  
NGVYKFVTVKNLDVIKKENYYEVNSKCYEEAKKLLKISNQAEFIASFYNNDLIKINGELYRVIG  
VNNDLLNRIEVMIDITYREYLENMNDKRPPRIIKTIASKTQSIKKYSTDILGNLYEVKSKKHPQI  
IKKGGSGSKRTADGSEFEPKKRKV

**LbABE8e(TadA-8e V106W)**

MKRTADGSEFESPKKKRKVSEVEFSHEYWMRHALTLAKRARDEREVPVGAVLVLNNRVIGE  
GWNRAIGLHDPTAHAEIMALRQGGLVMQNYRLIDATLYVTFEPCVMCAGAMIHSRIGRVVFG  
WRNSKRGAAGSLMNVLNYPGMNHRVEITEGILADECAALLCDFYRMPRQVFNAQKKAQSSI  
NSGGSSGGSSGSETPGTSESATPESSGGSSGGSSKLEKFTNCYSLSKTLRFKAIPVGKTQE  
NIDNKRLLEVEDEKRAEDYKGVKLLDRYLSFINDVLHSIKLKNLNNYISLFRKKTRTEKENKE  
LENLEINLRKEIAKAFKGNEGYKSLFKKDIETILPEFLDDKDEIALVNSFNNGFTTAFTGFFDNRE  
NMFSEEAKSTSIAFRGINENLTRYISNMDIFEKVDAIFDKHEVQEIKEKILNSDYDVEDFFEGEF

FNFVLTQEGIDVYNAIIGGFVTESGEKIKGLNEYINLYNQKTKQKLPKFKPLYKQVLS DRESLS  
FYGEGYTSDEEVLEVFRNTLNKNSEIFSSIKKLEKLFKNFDEYSSAGIFVKNNGPAISTISKDIFG  
EWNVIRDKWNAEYDDIHLKKKAVVTEKEYEDDRRKSFKKIGSFSLEQLQEYADADLSVVEKLG  
EIIIQKVDEIYKVYGSSEKLFDAADFVLEKSLKKNDAVVAIMKDLLDSVKSFENYIKAFFGEGKET  
NRDEFYGFVFLAYDILLKVDHIYDAIRNYVTQKPYSKDKFKLYFQNPQFMGGWDKDKETDY  
RATILRYGSKYYLAIMDKKYAKCLQKIDKDDVNGNYEKINYKLLPGPNKMLPKVFFSKKWMA  
YYNPSEDIQKIYKNGTFFKKGDMFNLNDCHKLIDFFKDSISRYPKWSNAYDFNFSETEKYKDIA  
GFYREVEEQGYKVSFESASKKEVDKLVVEEGKLYMFQIYNKDFSDKSHGTPNLHTMYFKLLF  
DENNHGQIRLSGGAELFMRRASLKKEELVVHPANSPIANKNPDNPKKTTTTLSYDVYKDKRFS  
EDQYELHIPIAINKCPKNIFKINTEVRVLLKHDDNPYVIGIARGERNLLYIVVVDGKGNIVEQYSL  
NEIINNFNGIRIKTDYHSLLDKKEKERFEARQNWTSIENIKELKAGYISQVVKICELVEKYDAVI  
ALEDLNSGFKNRSRVKVEKQVYQKFEKMLIDKLNVMVDKKSNPCATGGALKGYQITNKFESFK  
SMSTQNGFIFYIPAWLTSKIDPSTGFVNLLKTKYTSIADSKKFISFDRIMYVPEEDLFEFALDY  
KNFSRTDADYIKKWKLYSYGNRIRIFRNPKNVDFWEEVCLTSAYKELFNKYGINYQQGDI  
RALLCEQSDKAFYSSFMALMSLMLQMRNSITGRTDVFLLISPVKNSDGIFYDSRNYEAQENA  
ILPKNADANGAYNIARKVLWAIGQFKKAEDEKLDKVKIAISNKEWLEYAQT SVKSGGSKRTAD  
GSEFEPKKKRKV

**ABE8e(TadA-8e V82G)**

MKRTADGSEFESPKKKRKVSEVEFSHEYWMRHALTLAKRARDEREVPVGAVLVLNNRVIGE  
GWNRAIGLHDPTAHAEIMALRQGGLVMQNYRLIDATLYVTFEPCVMCAGAMIHSRIGRVVFG  
VRNSKRGAAAGSLMNVLNYPGMNHRVEITEGILADECAALLCDFYRMPRQVFNAQKKAQSSI  
NSGGSSGGSSGSETPGTSESATPESSGGSSGGSDKKYSIGLAIGTNSVGWAVITDEYKVP  
KKFKVLGNTDRHSIKKNLIGALLFDSGETAEATRLKRTARRRYTRRKNRICYLQEIFSNEMAK  
VDDSFHRLEESFLVEEDKKHERHPIFGNIVDEVAYHEKYPTIYHLRKKLVDSTDKADLRLIYL  
ALAHMIKFRGHFLIEGDLNPDNSDVKLFIQLVQTYNQLFEENPINASGVDAKAILSARLSKSR  
RLENLIAQLPGEKKNLFGNLIALSLGLTPNFKSNFDLAEDAKLQLSKDTYDDDLNLLAQIG  
DQYADLFLAAKNLSDAILLSDILRVNTEITKAPLSASMIKRYDEHHQDLTLLKALVRQQLPEKY  
KEIFFDQSKNGYAGYIDGGASQEEFYKFIKPILEKMDGTEELLVVLNREDLLRKQRTFDNGSI  
PHQIHLGELHAILRRQEDFYFPLKDNREKIEKILTFRIPYYVGPLARGNSRFAMTRKSEETIT  
PWNFEVVDKGGASAQSFIERMTNFDKNLPNEKVLPKHSLLEYFTVYNELTKVKYVTEGMR  
KPAFLSGEQKKAIVDLLFKTNRKVTVKQLKEDYFKKIECFDSVEISGVEDRFNASLGTYHDLL  
KIIKDKDFLDNEENEDILEDIVLTLTFEDREMIEERLKYAHLFDDKVMKQLKRRRYTGWGRL  
SRKLINGIRDKQSGKTILDFLKSDGFANRNFMLIHDDSLTFKEDIQKAQVSGQGDLSLHEHIA  
NLAGSPAIKKGILQTVKVDELVKVMGRHKPENIVIAMARENQTTQKGQKNSRERMKRIEEGI  
KELGSQILKEHPVENTQLQNEKLYLYLQNGRDMYVDQELDINRLSDYDVDHIVPQSFLKDD  
SIDNKVLTRSDKNRKGSDNVPSEEVVKKMKNYWRQLLNAKLITQRKFDNLTKAERGGLSEL  
DKAGFIKRQLVETRQITKHVAQILDSRMNTKYDENDKLIREVKVITLKSCLVSDFRKDFQFYKV  
REINNYHHAHDAYLNAVVG TALIKKYPKLESEFVYGDYKVYDVRKMIKSEQEIGKATAKYFF  
YSNIMNFFKTEITLANGEIRKRPLIETNGETGEIVWDKGRDFATVRKVL SMPQVNIVKKTEVQT  
GGFSKESILPKRNSDKLIARKKDWDPKKGFDSPVAVSVLVVAKVEKGKSKKLKSVKELL  
GITIMERSSEFKNPIDFLEAKGYKEVKKDLIILPKYSLFELENGRKRMLASAGELQKGNELAL  
PSKYVNFLYLASHYEKLGSPEDNEQKQLFVEQHKHYLDEIIEQISEFSKRVLADANL DKVLS  
AYNKHRDKPIREQAENIIHLFTLTNLGAPAAFKYFDTTIDRKRYTSTKEVLDATLIHQ SITGLYE  
TRIDLSQLGGDSGGSKRTADGSEFEPKKKRKV

**ABE8e(TadA-8e K20A R21A)**

MKRTADGSEFESPKKKRKVSEVEFSHEYWMRHALTLAKRARDEREVPVGAVLVLNNRVIGE  
GWNRAIGLHDPTAHAEIMALRQGGLVMQNYRLIDATLYVTFEPCVMCAGAMIHSRIGRVVFG

VRNSKRGAAAGSLMNVLNYPGMNHRVEITEGILADECAALLCDFYRMPRQVFNAQKKAQSSI  
NSGGSSGGSSGSETPGTSESATPESSGGSSGGSDKKYSIGLAIGTNSVGWAVITDEYKVPS  
KKFKVLGNTDRHSIKKNLIGALLFDSGETAEATRLKRTARRRYTRRKNRICYLQEIFSNEMAK  
VDDSSFFHRLEESFLVEEDKKHERHPIFGNIVDEVAYHEKYPTIYHLRKKLVDSTDKADLRILIY  
ALAHMIKFRGHFLIEGDLNPDNSDVKLFIQLVQTYNQLFEENPINASGVDAKAILSARLSKSR  
RLENLIAQLPGEKKNGLFGNLIASLGLTPNFKSNFDLAEDAQLQLSKDTYDDDLNLLAQIG  
DQYADLFLAAKNLSDAILLSDILRVNTEITKAPLSASMIKRYDEHHQDLTLLKALVRQQLPEKY  
KEIFFDQSKNGYAGYIDGGASQEEFYKFIKPILEKMDGTEELLVKLNREDLLRKQRTFDNGSI  
PHQIHLGELHAILRRQEDFYFPLKDNREKIEKILTFRIPYYVGPLARGNSRFAMTRKSEETIT  
PWNFEVVDKGAQAQSFIERMTNFDKNLPNEKVLPHKSHLLYEYFTVYNELTKVKYVTEGMR  
KPAFLSGEQKKAIVDLLFKTNRKVTVKQLKEDYFKKIECFDSVEISGVEDRFNASLGTYHDLL  
KIIKDKDFLDNEENEDILEDIVLTLTLFEDREMIEERLKYAHLFDDKVMKQLKRRRYTGWGRL  
SRKLINGIRDKQSGKTILDFLKSDGFANRNFMLIHDDSLTFKEDIQKAQVSGQGDLSLHEHIA  
NLAGSPAIKKGILQTVKVVDELVKVMGRHKPENIVIAMARENQTTQKGQKNSRERMKRIEEGI  
KELGSQILKEHPVENTQLQNEKLYLYLQNGRDMYVDQELDINRLSDYDVDHIVPQSFLKDD  
SIDNKVLTRSDKNRGKSDNVPSEEVVKKMKNYWRQLLNAKLITQRKFDNLTKAERGGLSEL  
DKAGFIKRQLVETRQITKHVAQILDSRMNTKYDENDKLIREVKVITLKSCLVSDFRKDFQFYKV  
REINNYHHAHDAYLNAVVGTAIIKKYPKLESEFVYGDYKVYDVRKMIKSEQEIGKATAKYFF  
YSNIMNFFKTEITLANGEIRKRPLIETNGETGEIVWDKGRDFATVRKVL SMPQVNIVKKTEVQT  
GGFSKESILPKRNSDKLIARKKDWDPKKGFFSPTVAVSVLVVAKVEKKGKSKKLKSVKELL  
GITIMERSSEFEKNPIDFLEAKGYKEVKKDLIIKLPKYSLFELENGRKRMLASAGELQKGNELAL  
PSKYVNFLYLASHYEKLGKSPEDNEQKQLFVEQHKHYLDEIIEQISEFSKRVILADANLDKVL  
AYNKHRDKPIREQAENIIHLFTLTNLGAPAAFYFDTTIDRKRYTSTKEVL DATLIHQ SITGLYE  
TRIDLSQLGGDSGGSKRTADGSEFEPKKRKY
